# Supplementary material for: Identification of Inflammatory Proteomics Networks of Toll-like Receptor 4 through Immunoprecipitation-Based Chemical Cross-Linking Proteomics
Source: MDPI journal article supplement (doi:10.3390/proteomes10030031), 2022-09-01
Supplement: s1 [file s1]

# Identification of Inflammatory Proteomics Networks of Toll-like Receptor 4 through Immunoprecipitation-Based Chemical Cross-Linking Proteomics

A.D.A. Shahinuzzaman <sup>1,2</sup>, Abu Hena Mostafa Kamal <sup>1,3</sup>, Jayanta K. Chakrabarty <sup>1,4</sup>, Aurchie Rahman <sup>1</sup> and Saiful M. Chowdhury <sup>1,\*</sup>

<sup>1</sup> Department of Chemistry and Biochemistry, The University of Texas at Arlington, Arlington, TX 76019, USA; [ada.shahinuzzaman@mavs.uta.edu](mailto:ada.shahinuzzaman@mavs.uta.edu) (A.S.); [abuhenamostafa.kamal@bcm.edu](mailto:abuhenamostafa.kamal@bcm.edu) (A.H.M.K.); [jayanta.chakrabarty@mavs.uta.edu](mailto:jayanta.chakrabarty@mavs.uta.edu) (J.K.C.); [aurchie.rahman@mavs.uta.edu](mailto:aurchie.rahman@mavs.uta.edu) (A.R.)

<sup>2</sup> Pharmaceutical Sciences Research Division, Bangladesh Council of Scientific and Industrial Research (BCSIR), Dhaka 1205, Bangladesh

<sup>3</sup> Advanced Technology Cores, Dan L Duncan Comprehensive Cancer Center, Baylor College of Medicine, Houston, TX 77030, USA

<sup>4</sup> Quantitative Proteomics and Metabolomics Center, Columbia University, New York, NY 10027, USA

\* Correspondence: [schowd@uta.edu](mailto:schowd@uta.edu); Tel.: +1-817-272-5439

## Supplementary Figures

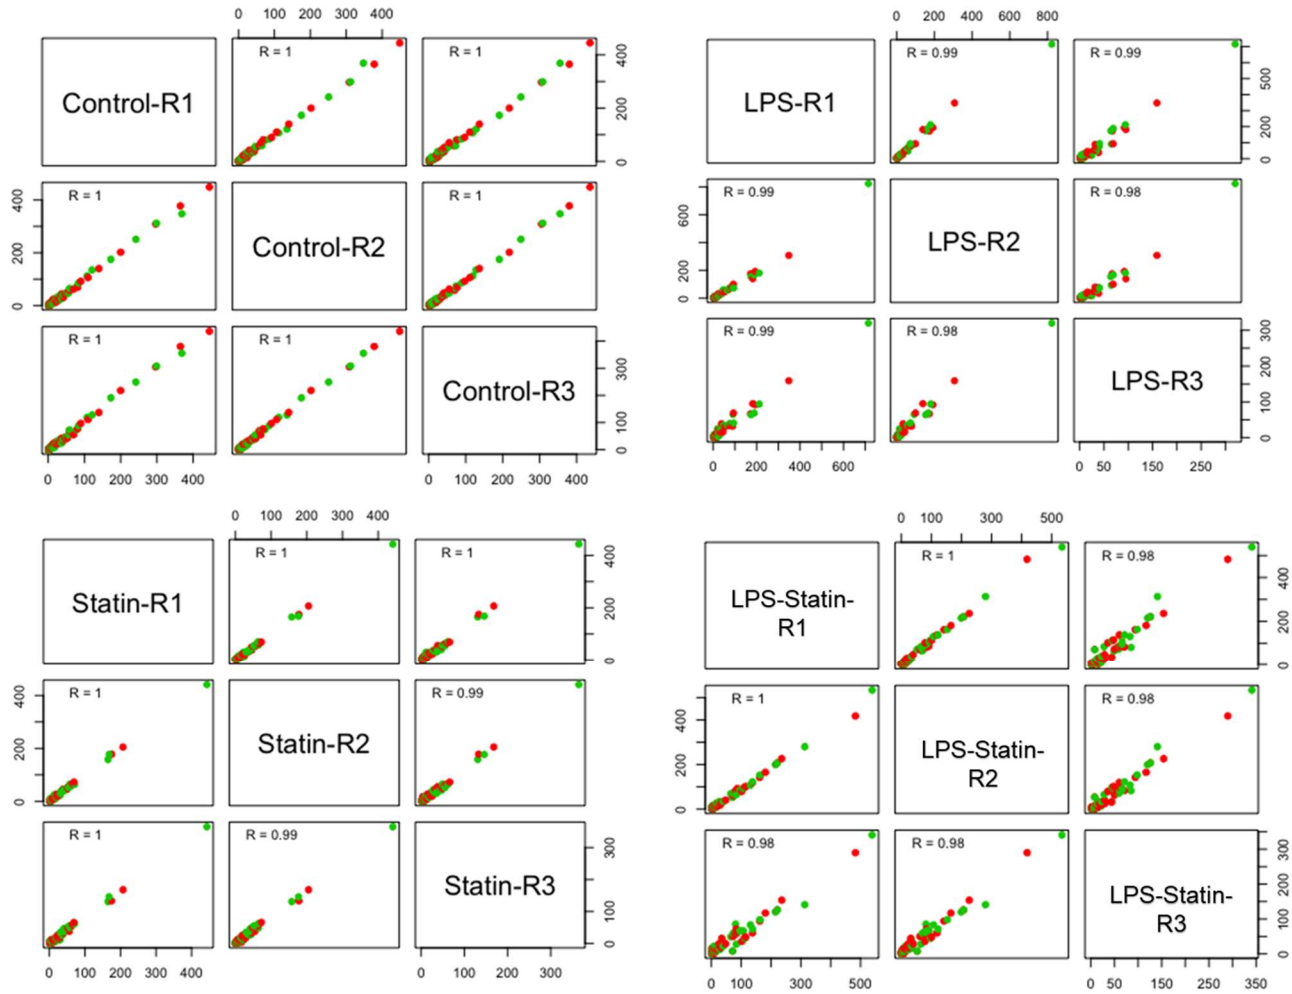

**Figure S1.** Scatter plots and pairwise correlations among the biological replicates showing significant correlation patterns among replicates of Control sample, LPS, Statin and LPS-Statin treated samples without cross-linker. The PSMs (Peptide Spectral counts) of replicates are plotted against each other across x and y-axis, correspondingly. Every spot symbolizes the abundances of a proteins and corresponds to Pearson's correlation coefficient ( $R^2$ ) of 1. The scatter plot and pairwise correlation analysis was performed by R package ver. 3.5.3.

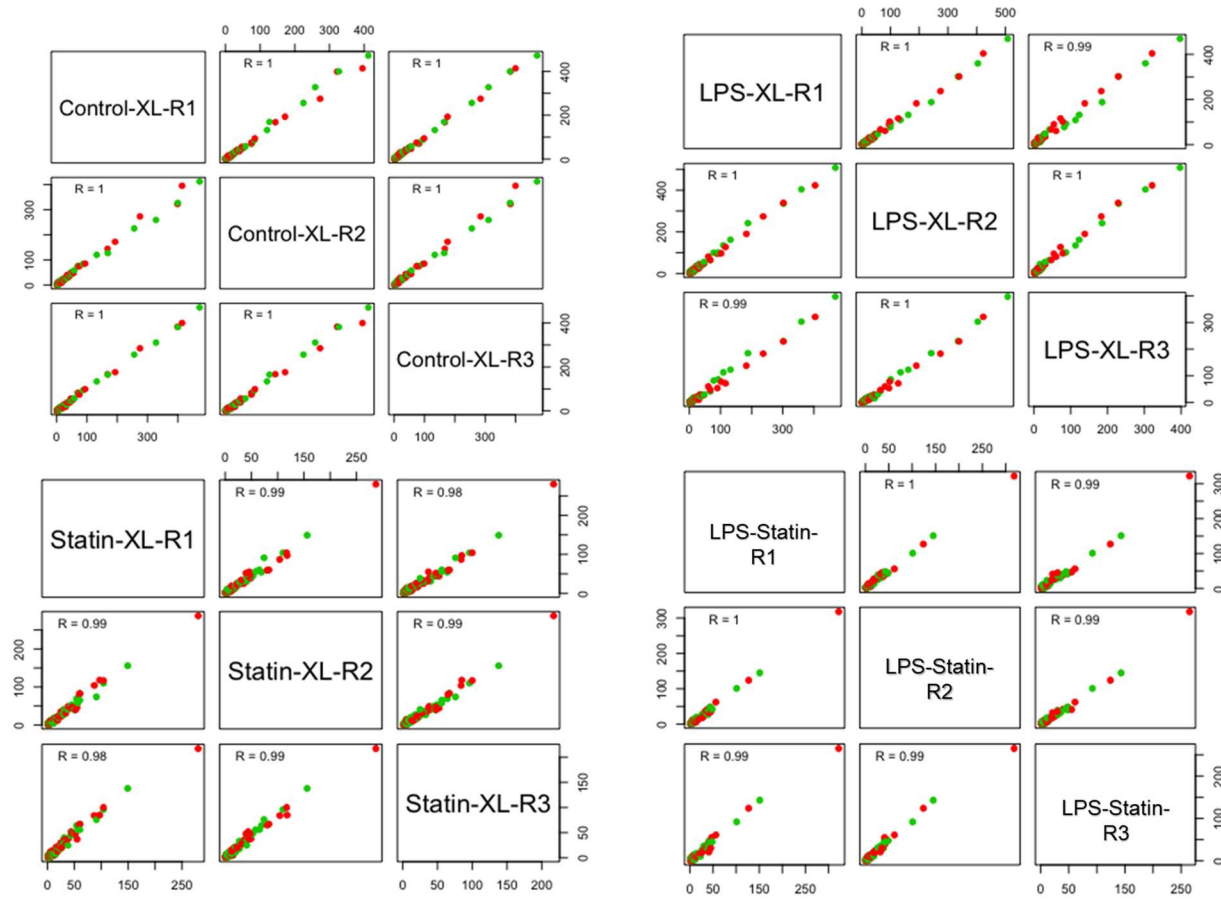

**Figure S2.** Scatter plots and pairwise correlations among the biological replicates showing significant correlation patterns among replicates of Control sample, LPS, Statin and LPS-Statin treated samples with cross-linker treatment. The PSMs (Peptide Spectral counts) of replicates are plotted against each other across x and y-axis, correspondingly. Every spot symbolizes the abundances of a proteins and corresponds to Pearson's correlation coefficient ( $R^2$ ) of 1. The scatter plot and pairwise correlation analysis was performed by R package ver. 3.5.3.

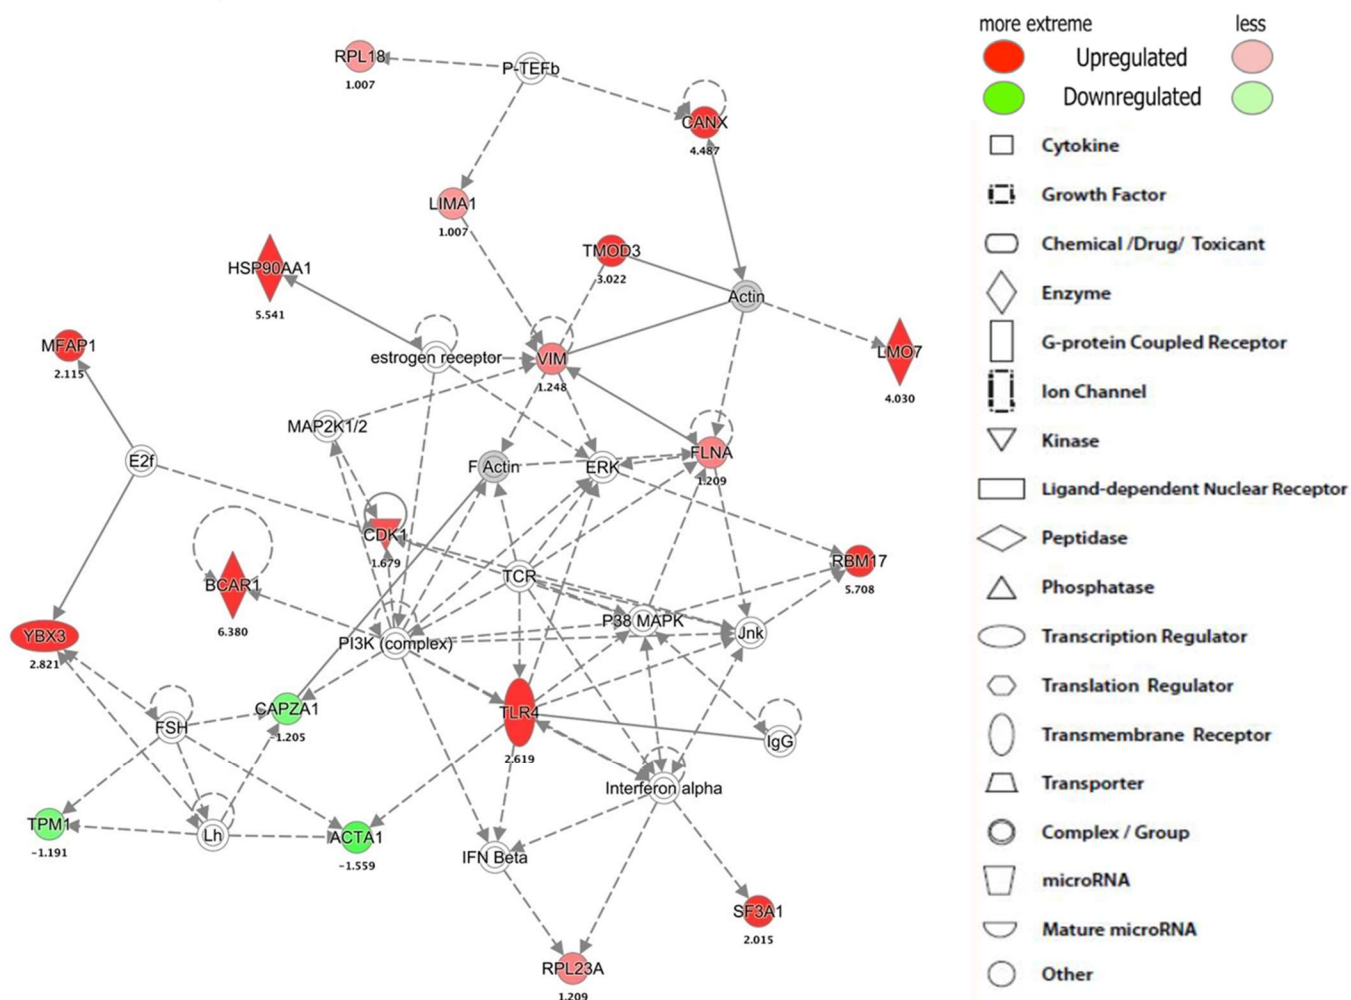

**Figure S3.** TLR4 targeted protein network with expression profile. The interaction network shown was generated using IPA bioinformatics software upon treatment of LPS in HA-TLR4-HEK293 cells.

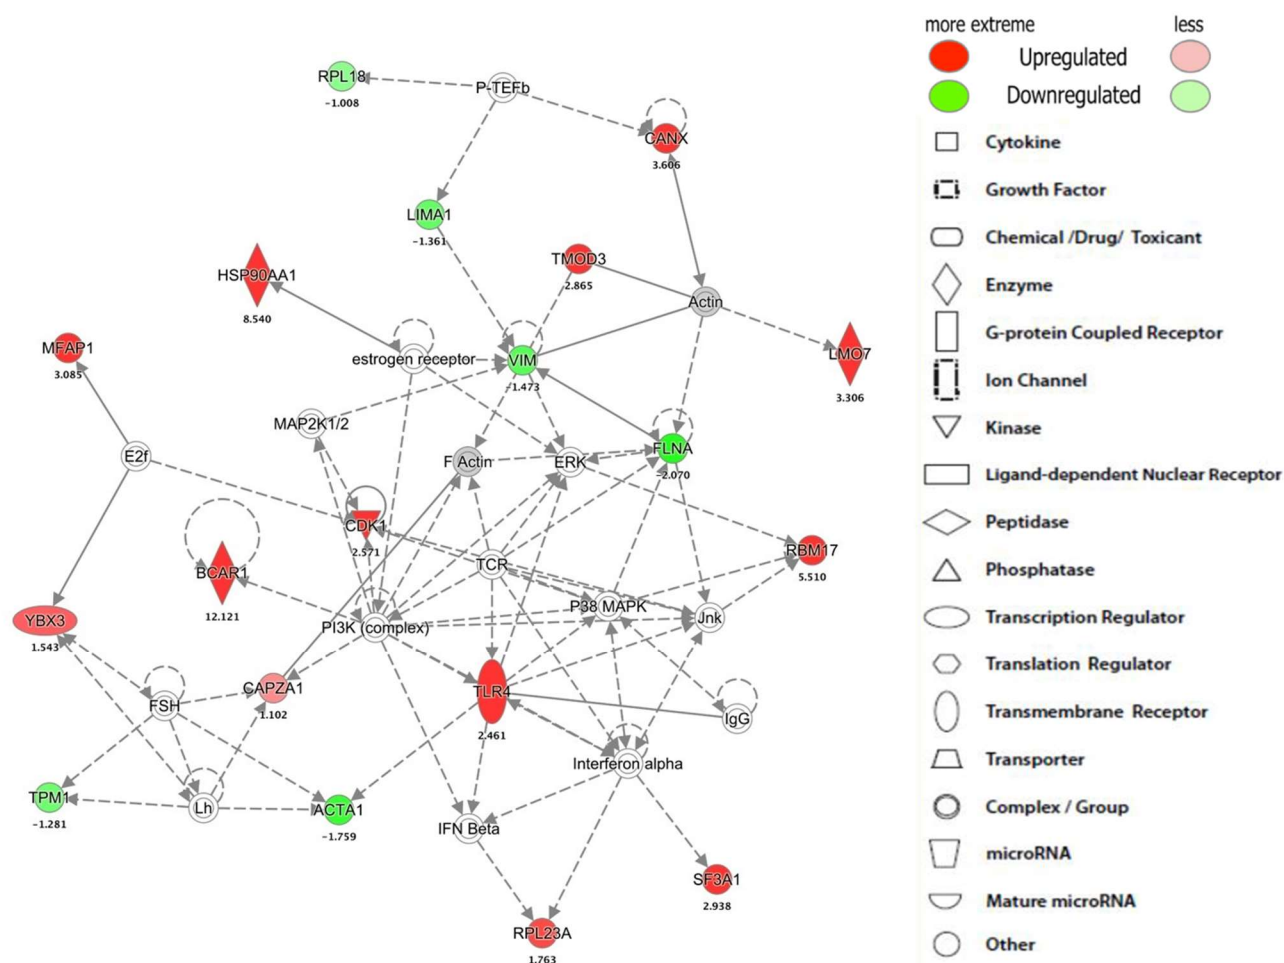

**Figure S4.** TLR4 targeted protein network with expression profile. The interaction network shown was generated using IPA bioinformatics software upon treatment of LPS-Statin in HA-TLR4-HEK293 cells.

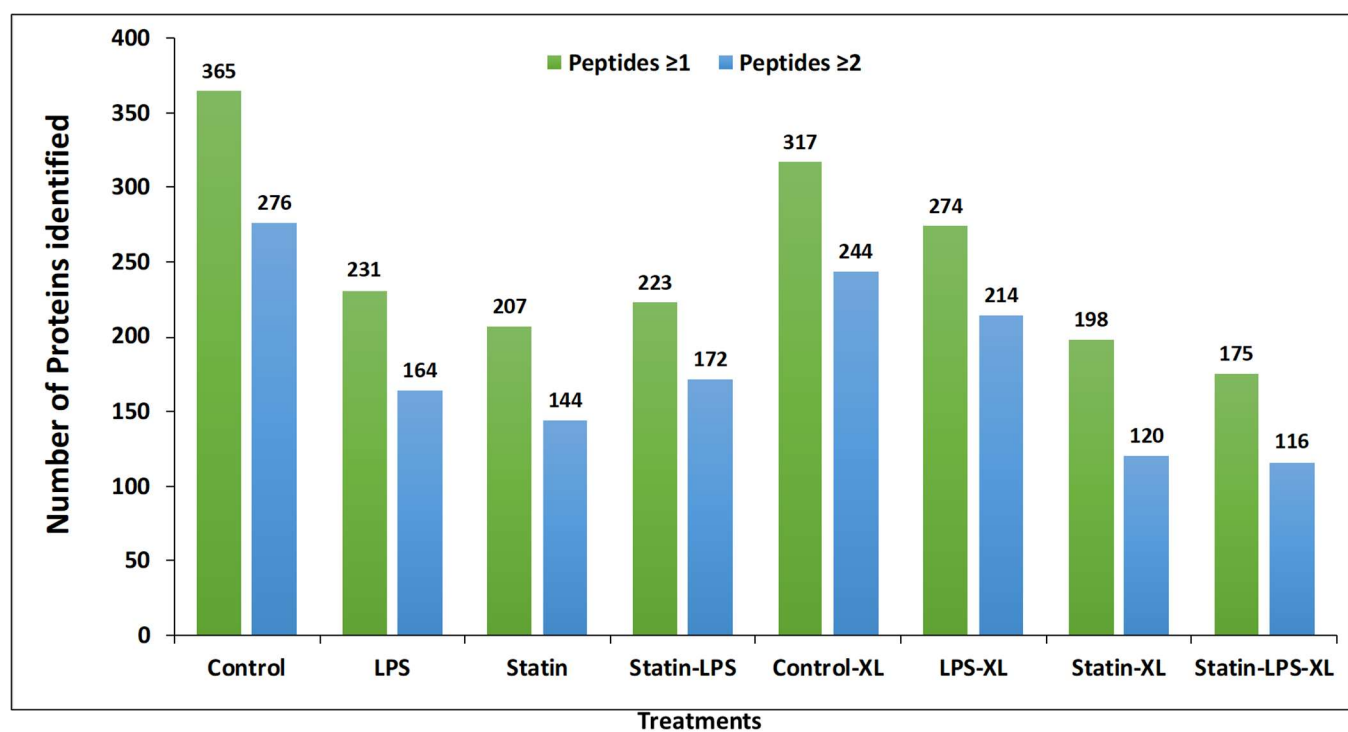

**Figure S5.** The number of proteins identified with or without cross-linkers across each treatment conditions where at least 1 or 2 peptides identified for each sample.
