# Supplementary material for: Identification of Inflammatory Proteomics Networks of Toll-like Receptor 4 through Immunoprecipitation-Based Chemical Cross-Linking Proteomics
Source: Proteomes. 2022 Sep 1;10(3):31. doi: 10.3390/proteomes10030031 (PMC9506174; doi:10.3390/proteomes10030031)
Supplement: Supplementary file 1 [file proteomes-10-00031-s001.zip]

Archive with 8 entries (8 files):
- Supplementary Materials.pdf
- Supplementary-Table -S1.xlsx
- Supplementary-Table -S2.xlsx
- Supplementary-Table -S3.xlsx
- Supplementary-Table -S4.xlsx
- Supplementary-Table -S5.xlsx
- Supplementary-Table -S6.xlsx
- Supplementary-Table -S7.xlsx
