# Supplementary material for: Identification of Inflammatory Proteomics Networks of Toll-like Receptor 4 through Immunoprecipitation-Based Chemical Cross-Linking Proteomics
Source: Proteomes. 2022 Sep 1;10(3):31. doi: 10.3390/proteomes10030031 (PMC9506174; doi:10.3390/proteomes10030031)
Supplement: Supplementary file 1 [file proteomes-10-00031-s001.zip › Supplementary-Table -S1.xlsx]

## Sheet: Proteins Nor. PSMs
Table S1. Detailed information about list of identified proteins in HEK293 cells upon treatment with Statin and/or LPS, alone or in combination with or without cross-linker (XL)
Accession	Description	Gene Name	Exp. q-value	Coverage	Peptides	PSMs	Protein Groups	MW [kDa]	calc. pI	Control PSMs			Control Nor. PSMs			Avg. Nor. PSM	SD Value	LPS PSMs			LPS Nor. PSMs			Avg. Nor. PSM	SD Value	Statin-PSMs			Statin Nor. PSMs			Avg. Nor. PSM	SD Value	LPS-Statin-PSMs			LPS-StatinNor. PSMs			Avg. Nor. PSM	SD Value	Control XL PSMs			Control XL Nor. PSMs			Avg. Nor. PSM	SD Value
										R1	R2	R3	R1	R2	R3			R1	R2	R3	R1	R2	R3			R1	R2	R3	R1	R2	R3			R1	R2	R3	R1	R2	R3			R1	R2	R3	R1	R2	R3
Q9BU76	Multiple myeloma tumor-associated protein 2	MMTAG2	0	19.7719	4	39	1	29.4	10.02	1	1	1	0.0174581	0.0174429	0.0172921	0.0173977	9.17828e-05	5	6	2	0.142939	0.171135	0.0589797	0.124351	0.0583424									1	4	2	0.0335458	0.125117	0.064	0.074221	0.0466335	3	1	1	0.0526316	0.0190512	0.0174917	0.0297248	0.0198531
B4DRM3	cDNA FLJ54492, highly similar to Eukaryotic translation initiation factor 4B		0	7.46753	3	38	1	69.7	5.67	1	1	1	0.0174581	0.0174429	0.0172921	0.0173977	9.17828e-05																	2	1	1	0.0670916	0.0312793	0.032	0.043457	0.0204713	2	1	1	0.0350877	0.0190512	0.0174917	0.0238769	0.00974013
Q9H9B4	Sideroflexin-1	SFXN1	0	8.69565	2	19	1	35.6	9.07	1	1	1	0.0174581	0.0174429	0.0172921	0.0173977	9.17828e-05																	2	1	1	0.0670916	0.0312793	0.032	0.043457	0.0204713	1	1	1	0.0175439	0.0190512	0.0174917	0.0180289	0.000885735
F8WAR4	MICOS complex subunit	CHCHD3	0	18.2573	5	22	1	27.7	6.64	1	1	1	0.0174581	0.0174429	0.0172921	0.0173977	9.17828e-05																	3	1	1	0.100637	0.0312793	0.032	0.0546389	0.0398375	2	3	3	0.0350877	0.0571537	0.0524751	0.0482388	0.011627
A0A024RDF6	Heterogeneous nuclear ribonucleoprotein D-like, isoform CRA_a	HNRPDL	0	6.19048	2	37	1	46.4	9.57	1	1	1	0.0174581	0.0174429	0.0172921	0.0173977	9.17828e-05
P62318	Small nuclear ribonucleoprotein Sm D3	SNRPD3	0.002	7.93651	1	21	1	13.9	10.32	1	1	1	0.0174581	0.0174429	0.0172921	0.0173977	9.17828e-05	2	1	2	0.0571755	0.0285225	0.0589797	0.0482259	0.0170874	1	1	1	0.0393546	0.0374813	0.0403714	0.0390691	0.00146608
A0A087WZN1	Isocitrate dehydrogenase [NAD] subunit, mitochondrial	IDH3B	0	4.39276	1	8	1	42.4	8.46	1	1	1	0.0174581	0.0174429	0.0172921	0.0173977	9.17828e-05																									1	1	1	0.0175439	0.0190512	0.0174917	0.0180289	0.000885735
P61626	Lysozyme C	LYZ	0	14.1892	2	9	1	16.5	9.16	1	1	1	0.0174581	0.0174429	0.0172921	0.0173977	9.17828e-05																									1	1	1	0.0175439	0.0190512	0.0174917	0.0180289	0.000885735
I3L504	Eukaryotic translation initiation factor 5A-1	EIF5A	0	10.7527	2	13	1	20.5	5.25	1	1	1	0.0174581	0.0174429	0.0172921	0.0173977	9.17828e-05																									2	1	2	0.0350877	0.0190512	0.0349834	0.0297075	0.00922869
Q9BUP0	EF-hand domain-containing protein D1	EFHD1	0	16.318	3	8	1	26.9	5.39	1	1	1	0.0174581	0.0174429	0.0172921	0.0173977	9.17828e-05																									3	1	1	0.0526316	0.0190512	0.0174917	0.0297248	0.0198531
O94832	Unconventional myosin-Id	MYO1D	0	4.57256	4	16	1	116.1	9.39	1	1	1	0.0174581	0.0174429	0.0172921	0.0173977	9.17828e-05																									3	1	1	0.0526316	0.0190512	0.0174917	0.0297248	0.0198531
Q01449	Myosin regulatory light chain 2, atrial isoform	MYL7	0.002	5.71429	1	11	1	19.4	4.88	1	1	1	0.0174581	0.0174429	0.0172921	0.0173977	9.17828e-05
F6N0C4	Protein Rev (Fragment)	rev	0.002	10.989	1	14	1	10.3	8.63	1	1	1	0.0174581	0.0174429	0.0172921	0.0173977	9.17828e-05
B0AZQ4	Structural maintenance of chromosomes protein		0	3.12243	3	9	1	141.4	7.18	1	1	1	0.0174581	0.0174429	0.0172921	0.0173977	9.17828e-05
A8K486	Peptidyl-prolyl cis-trans isomerase		0	23.6364	3	5	1	18	6.9	1	1	1	0.0174581	0.0174429	0.0172921	0.0173977	9.17828e-05
P78371	T-complex protein 1 subunit beta	CCT2	0.004	2.24299	1	8	1	57.5	6.46	1	1	1	0.0174581	0.0174429	0.0172921	0.0173977	9.17828e-05
Q14204	Cytoplasmic dynein 1 heavy chain 1	DYNC1H1	0	0.516573	2	5	1	532.1	6.4	1	1	1	0.0174581	0.0174429	0.0172921	0.0173977	9.17828e-05
A0A024R7M6	GATA zinc finger domain containing 2A, isoform CRA_a	GATAD2A	0.003	1.73502	1	6	1	68.1	9.94	1	1	1	0.0174581	0.0174429	0.0172921	0.0173977	9.17828e-05
Q9UPQ0	LIM and calponin homology domains-containing protein 1	LIMCH1	0	6.09418	4	11	1	121.8	6.47	1	1	1	0.0174581	0.0174429	0.0172921	0.0173977	9.17828e-05
A0A024RAM4	Microtubule-associated protein 1B, isoform CRA_b	MAP1B	0	1.01297	2	6	1	270.5	4.81	1	1	1	0.0174581	0.0174429	0.0172921	0.0173977	9.17828e-05
A0A0S2Z4A5	DNA helicase (Fragment)	MCM7	0	4.03338	2	3	1	81.3	6.46	1	1	1	0.0174581	0.0174429	0.0172921	0.0173977	9.17828e-05
A8MYK1	39S ribosomal protein L23, mitochondrial	MRPL23	0	7.8534	1	3	1	21.8	11.62	1	1	1	0.0174581	0.0174429	0.0172921	0.0173977	9.17828e-05
H7BZJ3	Protein disulfide-isomerase A3 (Fragment)	PDIA3	0	21.1382	2	10	1	13.5	7.3	1	1	1	0.0174581	0.0174429	0.0172921	0.0173977	9.17828e-05
Q9HCY8	Protein S100-A14	S100A14	0.002	14.4231	1	3	1	11.7	5.24	1	1	1	0.0174581	0.0174429	0.0172921	0.0173977	9.17828e-05
P05109	Protein S100-A8	S100A8	0.002	11.828	1	5	1	10.8	7.03	1	1	1	0.0174581	0.0174429	0.0172921	0.0173977	9.17828e-05
X6RAL5	Histone deacetylase complex subunit SAP18	SAP18	0	7.55814	1	6	1	19.5	9.8	1	1	1	0.0174581	0.0174429	0.0172921	0.0173977	9.17828e-05
F8VXC8	SWI/SNF complex subunit SMARCC2	SMARCC2	0	1.68675	1	4	1	136.1	5.71	1	1	1	0.0174581	0.0174429	0.0172921	0.0173977	9.17828e-05
P28290	Sperm-specific antigen 2	SSFA2	0	3.49484	3	8	1	138.3	5.19	1	1	1	0.0174581	0.0174429	0.0172921	0.0173977	9.17828e-05
Q9Y3F4	Serine-threonine kinase receptor-associated protein	STRAP	0.002	5.14286	1	7	1	38.4	5.12	1	1	1	0.0174581	0.0174429	0.0172921	0.0173977	9.17828e-05
Q7L0Y3	Mitochondrial ribonuclease P protein 1	TRMT10C	0.002	2.72953	1	4	1	47.3	9.36	1	1	1	0.0174581	0.0174429	0.0172921	0.0173977	9.17828e-05
Q14157	Ubiquitin-associated protein 2-like	UBAP2L	0.002	1.37994	1	4	1	114.5	7.11	1	1	1	0.0174581	0.0174429	0.0172921	0.0173977	9.17828e-05
Q5BKZ1	DBIRD complex subunit ZNF326	ZNF326	0.002	2.74914	1	3	1	65.6	5.15	1	1	1	0.0174581	0.0174429	0.0172921	0.0173977	9.17828e-05
A0A024RBF6	HCG26523, isoform CRA_a	hCG_26523	0	12.4138	3	41	1	17.3	10.2	2	2	2	0.0349162	0.0348857	0.0345841	0.0347954	0.000183566	2	2	1	0.0571755	0.0570451	0.0294898	0.0479035	0.0159468	1	1	1	0.0393546	0.0374813	0.0403714	0.0390691	0.00146608	1	3	2	0.0335458	0.093838	0.064	0.0637946	0.0301466	2	3	4	0.0350877	0.0571537	0.0699668	0.0540694	0.0176429
Q9UHX1	Poly(U)-binding-splicing factor PUF60	PUF60	0	12.5224	4	32	1	59.8	5.29	2	2	2	0.0349162	0.0348857	0.0345841	0.0347954	0.000183566																	2	1	1	0.0670916	0.0312793	0.032	0.043457	0.0204713
B4DJM5	cDNA FLJ61294, highly similar to Keratin, type I cytoskeletal 17		0	16.9492	3	20	1	18.9	8.13	2	2	2	0.0349162	0.0348857	0.0345841	0.0347954	0.000183566									2	3	2	0.0787092	0.112444	0.0807428	0.0906319	0.018917
P51991	Heterogeneous nuclear ribonucleoprotein A3	HNRNPA3	0	11.9048	3	28	1	39.6	9.01	2	2	2	0.0349162	0.0348857	0.0345841	0.0347954	0.000183566																									1	2	1	0.0175439	0.0381025	0.0174917	0.0243793	0.0118846
P12273	Prolactin-inducible protein	PIP	0	43.8356	5	15	1	16.6	8.05	2	2	2	0.0349162	0.0348857	0.0345841	0.0347954	0.000183566																									2	1	1	0.0350877	0.0190512	0.0174917	0.0238769	0.00974013
Q96N67	Dedicator of cytokinesis protein 7	DOCK7	0	1.16822	2	22	1	242.4	6.8	2	2	2	0.0349162	0.0348857	0.0345841	0.0347954	0.000183566																									2	2	2	0.0350877	0.0381025	0.0349834	0.0360579	0.00177147
D3DUK1	Breast cancer anti-estrogen resistance 1, isoform CRA_a	BCAR1	0	16.7793	10	106	1	95.1	5.74	3	3	3	0.0523743	0.0523286	0.0518762	0.052193	0.000275348	6	6	5	0.171527	0.171135	0.147449	0.16337	0.0137895	6	10	8	0.236128	0.374813	0.322971	0.311304	0.0700749	12	10	7	0.402549	0.312793	0.224	0.313114	0.0892752	6	7	6	0.105263	0.133359	0.10495	0.114524	0.0163121
P61163	Alpha-centractin	ACTR1A	0	15.4255	4	28	1	42.6	6.64	4	4	4	0.0698324	0.0697715	0.0691683	0.0695907	0.000367131
P06733	Alpha-enolase	ENO1	0	32.0276	9	89	1	47.1	7.39	6	6	6	0.104749	0.104657	0.103752	0.104386	0.000550697	2	1	2	0.0571755	0.0285225	0.0589797	0.0482259	0.0170874	6	5	2	0.236128	0.187406	0.0807428	0.168092	0.0794725	2	3	1	0.0670916	0.093838	0.032	0.0643099	0.0310127	6	4	9	0.105263	0.076205	0.157425	0.112964	0.0411541
A0A024R4Q8	Ribosomal protein S5, isoform CRA_a	RPS5	0	41.6667	8	232	1	22.9	9.72	18	18	18	0.314246	0.313972	0.311257	0.313158	0.00165209	3	8	4	0.0857633	0.22818	0.117959	0.143968	0.0746858	2	2	3	0.0787092	0.0749625	0.121114	0.0915953	0.0256327	6	3	3	0.201275	0.093838	0.096	0.130371	0.061414	15	19	20	0.263158	0.361974	0.349834	0.324988	0.0538898
P62851	40S ribosomal protein S25	RPS25	0	35.2	5	304	1	13.7	10.11	9	9	10	0.157123	0.156986	0.172921	0.162343	0.00916063	12	12	12	0.343053	0.34227	0.353878	0.3464	0.00648745	12	11	8	0.472255	0.412294	0.322971	0.402507	0.0751215	10	12	13	0.335458	0.375352	0.416	0.375603	0.0402716	11	9	12	0.192982	0.171461	0.2099	0.191448	0.0192654
P46776	60S ribosomal protein L27a	RPL27A	0	28.3784	4	169	1	16.6	11	5	5	6	0.0872905	0.0872144	0.103752	0.0927524	0.00952632	5	6	5	0.142939	0.171135	0.147449	0.153841	0.015146	6	7	6	0.236128	0.262369	0.242229	0.246908	0.0137323	5	6	5	0.167729	0.187676	0.16	0.171802	0.0142804	5	8	9	0.0877193	0.15241	0.157425	0.132518	0.0388779
P14649	Myosin light chain 6B	MYL6B	0	28.3654	5	243	1	22.8	5.73	16	15	16	0.27933	0.261643	0.276673	0.272549	0.00953736	7	6	7	0.200114	0.171135	0.206429	0.192559	0.0188206	7	6	7	0.275482	0.224888	0.2826	0.26099	0.0314674	7	8	6	0.234821	0.250235	0.192	0.225685	0.030173	15	12	10	0.263158	0.228615	0.174917	0.22223	0.0444657
P62847	40S ribosomal protein S24	RPS24	0	28.5714	3	93	1	15.4	10.78	8	9	9	0.139665	0.156986	0.155629	0.15076	0.00963244	2	1	2	0.0571755	0.0285225	0.0589797	0.0482259	0.0170874	1	1	1	0.0393546	0.0374813	0.0403714	0.0390691	0.00146608	3	4	1	0.100637	0.125117	0.032	0.0859182	0.0482721	8	9	7	0.140351	0.171461	0.122442	0.144751	0.0248042
A0A0S2Z4Z6	Serine/arginine repetitive matrix 1 isoform 2 (Fragment)	SRRM1	0	9.69499	5	73	1	103.9	11.84	3	3	4	0.0523743	0.0523286	0.0691683	0.0579571	0.0097092	1	1	1	0.0285878	0.0285225	0.0294898	0.0288667	0.000540621																	5	4	3	0.0877193	0.076205	0.0524751	0.0721331	0.0179715
P08708	40S ribosomal protein S17	RPS17	0	59.2593	8	211	1	15.5	9.85	10	9	10	0.174581	0.156986	0.172921	0.168163	0.00971478	14	15	10	0.400229	0.427838	0.294898	0.374322	0.0701543	9	10	12	0.354191	0.374813	0.484457	0.404487	0.0700194	16	13	12	0.536733	0.406631	0.384	0.442455	0.0824276	10	15	13	0.175439	0.285769	0.227392	0.229533	0.0551962
F4ZW66	NF110b		0	11.0245	8	49	1	95.7	8.81	6	7	7	0.104749	0.1221	0.121044	0.115964	0.00972749																									2	4	2	0.0350877	0.076205	0.0349834	0.0487587	0.0237692
J3KN67	Tropomyosin alpha-3 chain	TPM3	0	28.4211	8	96	1	33.2	4.77	9	8	9	0.157123	0.139543	0.155629	0.150765	0.00974707	3	5	2	0.0857633	0.142613	0.0589797	0.0957852	0.0427077	2	1	4	0.0787092	0.0374813	0.161486	0.0925587	0.0631516	3	4	4	0.100637	0.125117	0.128	0.117918	0.0150349	6	7	8	0.105263	0.133359	0.139934	0.126185	0.0184148
Q6IPI1	60S ribosomal protein L29	RPL29	0	14.2857	2	131	1	17.9	11.66	5	6	6	0.0872905	0.104657	0.103752	0.0985667	0.00977596	2	2	3	0.0571755	0.0570451	0.0884695	0.0675634	0.0181053	3	1	3	0.118064	0.0374813	0.121114	0.0922198	0.0474295	2	3	3	0.0670916	0.093838	0.096	0.0856432	0.0161025	3	5	3	0.0526316	0.0952562	0.0524751	0.0667876	0.0246547
P42766	60S ribosomal protein L35	RPL35	0	30.0813	4	169	1	14.5	11.05	5	6	6	0.0872905	0.104657	0.103752	0.0985667	0.00977596	5	2	3	0.142939	0.0570451	0.0884695	0.0961511	0.0434591	3	3	3	0.118064	0.112444	0.121114	0.117207	0.00439823	3	3	5	0.100637	0.093838	0.16	0.118158	0.036395	11	10	9	0.192982	0.190512	0.157425	0.180307	0.0198544
Q15366	Poly(rC)-binding protein 2	PCBP2	0	18.9041	5	62	1	38.6	6.79	5	6	6	0.0872905	0.104657	0.103752	0.0985667	0.00977596																									6	6	5	0.105263	0.114307	0.0874585	0.102343	0.0136606
Q9BZK3	Putative nascent polypeptide-associated complex subunit alpha-like protein	NACAP1	0	13.1455	2	29	1	23.3	4.59	2	2	3	0.0349162	0.0348857	0.0518762	0.0405594	0.00980066									2	2	1	0.0787092	0.0749625	0.0403714	0.064681	0.0211359									3	3	1	0.0526316	0.0571537	0.0174917	0.0424257	0.0217115
A0A024R6W0	Aspartate aminotransferase	GOT2	0	13.0233	5	15	1	47.4	9.01	2	2	3	0.0349162	0.0348857	0.0518762	0.0405594	0.00980066
A8K329	cDNA FLJ76656, highly similar to Homo sapiens scaffold attachment factor B (SAFB), mRNA		0	4.0393	3	11	1	102.7	5.44	2	2	3	0.0349162	0.0348857	0.0518762	0.0405594	0.00980066
P62249	40S ribosomal protein S16	RPS16	0	57.5342	9	132	1	16.4	10.21	7	6	7	0.122207	0.104657	0.121044	0.115969	0.00981389	6	6	6	0.171527	0.171135	0.176939	0.1732	0.00324373	7	7	7	0.275482	0.262369	0.2826	0.273484	0.0102625	6	4	8	0.201275	0.125117	0.256	0.194131	0.0657332	6	6	6	0.105263	0.114307	0.10495	0.108174	0.00531441
Q53Z07	NPC-A-16	RPL9	0	28.6458	5	81	1	21.9	9.95	6	5	6	0.104749	0.0872144	0.103752	0.0985718	0.00984841	5	3	3	0.142939	0.0855676	0.0884695	0.105659	0.0323182	1	1	2	0.0393546	0.0374813	0.0807428	0.0525262	0.0244542	2	3	3	0.0670916	0.093838	0.096	0.0856432	0.0161025	10	7	8	0.175439	0.133359	0.139934	0.149577	0.0226368
P00558	Phosphoglycerate kinase 1	PGK1	0	25.6595	8	48	1	44.6	8.1	5	4	5	0.0872905	0.0697715	0.0864603	0.0811741	0.00988367																									3	5	5	0.0526316	0.0952562	0.0874585	0.0784488	0.0226957
O00488	Zinc finger protein 593	ZNF593	0	18.6567	2	17	1	15.2	9.82	1	1	2	0.0174581	0.0174429	0.0345841	0.0231617	0.00989211	1	1	1	0.0285878	0.0285225	0.0294898	0.0288667	0.000540621									1	1	1	0.0335458	0.0312793	0.032	0.032275	0.00115799
P18077	60S ribosomal protein L35a	RPL35A	0	10.9091	1	28	1	12.5	11.06	1	1	2	0.0174581	0.0174429	0.0345841	0.0231617	0.00989211	2	2	2	0.0571755	0.0570451	0.0589797	0.0577334	0.00108124	1	2	1	0.0393546	0.0749625	0.0403714	0.0515628	0.0202711	2	1	2	0.0670916	0.0312793	0.064	0.0541236	0.0198441	2	1	1	0.0350877	0.0190512	0.0174917	0.0238769	0.00974013
P26368	Splicing factor U2AF 65 kDa subunit	U2AF2	0	9.68421	3	17	1	53.5	9.09	1	1	2	0.0174581	0.0174429	0.0345841	0.0231617	0.00989211																	2	1	2	0.0670916	0.0312793	0.064	0.0541236	0.0198441
Q9BZL4	Protein phosphatase 1 regulatory subunit 12C	PPP1R12C	0	5.24297	3	41	1	84.8	5.57	1	1	2	0.0174581	0.0174429	0.0345841	0.0231617	0.00989211	4	5	6	0.114351	0.142613	0.176939	0.144634	0.0313429	3	1	3	0.118064	0.0374813	0.121114	0.0922198	0.0474295	3	2	4	0.100637	0.0625586	0.128	0.0970653	0.0328666	1	2	1	0.0175439	0.0381025	0.0174917	0.0243793	0.0118846
A8K517	Ribosomal protein S23, isoform CRA_a	RPS23	0	23.7762	3	66	1	15.8	10.49	1	1	2	0.0174581	0.0174429	0.0345841	0.0231617	0.00989211	5	4	7	0.142939	0.11409	0.206429	0.154486	0.0472399	6	4	8	0.236128	0.149925	0.322971	0.236341	0.0865233	6	7	5	0.201275	0.218955	0.16	0.19341	0.0302543
Q5D862	Filaggrin-2	FLG2	0	0.501882	1	18	1	247.9	8.31	1	1	2	0.0174581	0.0174429	0.0345841	0.0231617	0.00989211
B4DWA7	Serine hydroxymethyltransferase		0	7.21248	3	13	1	56.3	9.42	1	1	2	0.0174581	0.0174429	0.0345841	0.0231617	0.00989211																									1	1	2	0.0175439	0.0190512	0.0349834	0.0238595	0.00966301
Q13045	Protein flightless-1 homolog	FLII	0	4.33412	4	14	1	144.7	6.05	1	1	2	0.0174581	0.0174429	0.0345841	0.0231617	0.00989211																									2	1	2	0.0350877	0.0190512	0.0349834	0.0297075	0.00922869
A8K521	DNA helicase		0	3.81471	2	7	1	82.2	8.37	1	1	2	0.0174581	0.0174429	0.0345841	0.0231617	0.00989211
A0A024R2T6	DEAH (Asp-Glu-Ala-His) box polypeptide 30, isoform CRA_b	DHX30	0	3.18258	3	4	1	133.9	8.78	1	1	2	0.0174581	0.0174429	0.0345841	0.0231617	0.00989211
P12268	Inosine-5'-monophosphate dehydrogenase 2	IMPDH2	0	3.89105	2	13	1	55.8	6.9	1	1	2	0.0174581	0.0174429	0.0345841	0.0231617	0.00989211
D3DSQ0	Pericentriolar material 1, isoform CRA_a	PCM1	0	1.58103	3	5	1	228.4	5.02	1	1	2	0.0174581	0.0174429	0.0345841	0.0231617	0.00989211
K7ELC2	40S ribosomal protein S15	RPS15	0	29.6053	4	59	1	17.7	10.39	4	3	4	0.0698324	0.0523286	0.0691683	0.0637764	0.00991965	4	2	3	0.114351	0.0570451	0.0884695	0.0866219	0.0286976	2	3	4	0.0787092	0.112444	0.161486	0.117546	0.0416235	4	4	6	0.134183	0.125117	0.192	0.150433	0.0362819	3	5	3	0.0526316	0.0952562	0.0524751	0.0667876	0.0246547
Q9NZI8	Insulin-like growth factor 2 mRNA-binding protein 1	IGF2BP1	0	15.5979	6	36	1	63.4	9.2	4	3	4	0.0698324	0.0523286	0.0691683	0.0637764	0.00991965																									3	5	3	0.0526316	0.0952562	0.0524751	0.0667876	0.0246547
Q08J23	tRNA (cytosine(34)-C(5))-methyltransferase	NSUN2	0	7.1708	4	33	1	86.4	6.77	3	2	3	0.0523743	0.0348857	0.0518762	0.0463787	0.00995634
A0A024R2Q4	Ribosomal protein L15	RPL15	0	11.2745	2	27	1	24.1	11.62	3	2	3	0.0523743	0.0348857	0.0518762	0.0463787	0.00995634																									2	2	2	0.0350877	0.0381025	0.0349834	0.0360579	0.00177147
B2RBR9	cDNA, FLJ95650, highly similar to Homo sapiens karyopherin (importin) beta 1 (KPNB1), mRNA		0	7.19178	5	30	1	97.1	4.78	1	2	2	0.0174581	0.0348857	0.0345841	0.028976	0.00997593																	1	2	1	0.0335458	0.0625586	0.032	0.0427015	0.0172142	2	1	1	0.0350877	0.0190512	0.0174917	0.0238769	0.00974013
A0A024RDQ8	Replication factor C (Activator 1) 3, 38kDa, isoform CRA_a	RFC3	0	7.86517	2	10	1	40.5	8.34	1	2	2	0.0174581	0.0348857	0.0345841	0.028976	0.00997593																									1	1	1	0.0175439	0.0190512	0.0174917	0.0180289	0.000885735
P62244	40S ribosomal protein S15a	RPS15A	0	24.6154	4	24	1	14.8	10.13	1	2	2	0.0174581	0.0348857	0.0345841	0.028976	0.00997593	1	4	2	0.0285878	0.11409	0.0589797	0.0672192	0.0433426																	2	1	2	0.0350877	0.0190512	0.0349834	0.0297075	0.00922869
Q6PJJ2	RRP1 protein (Fragment)	RRP1	0	5.36481	2	15	1	53.4	9.48	1	2	2	0.0174581	0.0348857	0.0345841	0.028976	0.00997593																									2	1	2	0.0350877	0.0190512	0.0349834	0.0297075	0.00922869
J3QR44	Cyclin-dependent kinase 11B	CDK11B	0	3.89937	2	17	1	92.6	5.54	1	2	2	0.0174581	0.0348857	0.0345841	0.028976	0.00997593
Q9H444	Charged multivesicular body protein 4b	CHMP4B	0	11.1607	2	9	1	24.9	4.82	1	2	2	0.0174581	0.0348857	0.0345841	0.028976	0.00997593
A0A024R7U6	DNA helicase	MCM4	0	4.05562	2	6	1	96.5	6.74	1	2	2	0.0174581	0.0348857	0.0345841	0.028976	0.00997593
A0A024RBB7	Nucleosome assembly protein 1-like 1, isoform CRA_a	NAP1L1	0.002	4.34783	1	10	1	45.3	4.46	1	2	2	0.0174581	0.0348857	0.0345841	0.028976	0.00997593
A0A0S2Z4Z9	Non-POU domain containing octamer-binding isoform 1 (Fragment)	NONO	0	9.97877	5	28	1	54.2	8.95	2	1	2	0.0349162	0.0174429	0.0345841	0.0289811	0.00999375																	1	1	1	0.0335458	0.0312793	0.032	0.032275	0.00115799	1	2	1	0.0175439	0.0381025	0.0174917	0.0243793	0.0118846
P49207	60S ribosomal protein L34	RPL34	0	15.3846	3	30	1	13.3	11.47	2	1	2	0.0349162	0.0174429	0.0345841	0.0289811	0.00999375																	1	1	1	0.0335458	0.0312793	0.032	0.032275	0.00115799	1	2	1	0.0175439	0.0381025	0.0174917	0.0243793	0.0118846
P27824	Calnexin	CANX	0	14.6959	7	137	1	67.5	4.6	2	1	2	0.0349162	0.0174429	0.0345841	0.0289811	0.00999375	13	15	11	0.371641	0.427838	0.324388	0.374622	0.0517894	11	13	9	0.4329	0.487256	0.363343	0.427833	0.062112	11	11	11	0.369004	0.344073	0.352	0.355025	0.0127379	5	3	3	0.0877193	0.0571537	0.0524751	0.0657827	0.0191411
B2RMV2	CYTSA protein	CYTSA	0	13.6079	13	111	1	124.5	5.76	2	1	2	0.0349162	0.0174429	0.0345841	0.0289811	0.00999375	8	13	10	0.228702	0.370793	0.294898	0.298131	0.0711005	9	12	10	0.354191	0.449775	0.403714	0.40256	0.0478024	12	15	10	0.402549	0.46919	0.32	0.397246	0.0747362
A0A087WUZ3	Spectrin beta chain	SPTBN1	0	22.9079	41	205	1	274.7	5.57	2	1	2	0.0349162	0.0174429	0.0345841	0.0289811	0.00999375	42	30	38	1.20069	0.855676	1.12061	1.05899	0.180571	6	7	8	0.236128	0.262369	0.322971	0.273823	0.0445405	17	16	17	0.570278	0.500469	0.544	0.538249	0.0352581	4	5	3	0.0701754	0.0952562	0.0524751	0.0726356	0.0214964
O95425	Supervillin	SVIL	0	3.74887	6	21	1	247.6	6.98	2	1	2	0.0349162	0.0174429	0.0345841	0.0289811	0.00999375	2	1	1	0.0571755	0.0285225	0.0294898	0.038396	0.0162708																	2	3	1	0.0350877	0.0571537	0.0174917	0.0365777	0.019873
Q14247	Src substrate cortactin	CTTN	0	9.63636	4	17	1	61.5	5.4	2	1	2	0.0349162	0.0174429	0.0345841	0.0289811	0.00999375																									3	1	2	0.0526316	0.0190512	0.0349834	0.0355554	0.0167975
D3DTX6	Neurabin-2	PPP1R9B	0	11.7503	8	35	1	89.3	4.97	1	2	1	0.0174581	0.0348857	0.0172921	0.023212	0.0101101	1	2	2	0.0285878	0.0570451	0.0589797	0.0482042	0.0170158									4	3	2	0.134183	0.093838	0.064	0.0973404	0.0352224	4	4	4	0.0701754	0.076205	0.0699668	0.0721157	0.00354294
H0Y4Z8	Chromosome 9 open reading frame 86, isoform CRA_b	RABL6	0	6.57534	3	19	1	79.6	5.22	1	2	1	0.0174581	0.0348857	0.0172921	0.023212	0.0101101
Q92499	ATP-dependent RNA helicase DDX1	DDX1	0	1.75676	1	11	1	82.4	7.23	1	2	1	0.0174581	0.0348857	0.0172921	0.023212	0.0101101																									1	1	1	0.0175439	0.0190512	0.0174917	0.0180289	0.000885735
P29401	Transketolase	TKT	0	5.939	2	17	1	67.8	7.66	1	2	1	0.0174581	0.0348857	0.0172921	0.023212	0.0101101
Q96CT7	Coiled-coil domain-containing protein 124	CCDC124	0	10.3139	2	15	1	25.8	9.54	1	2	1	0.0174581	0.0348857	0.0172921	0.023212	0.0101101
P99999	Cytochrome c	CYCS	0	13.3333	1	5	1	11.7	9.57	1	2	1	0.0174581	0.0348857	0.0172921	0.023212	0.0101101
Q08211	ATP-dependent RNA helicase A	DHX9	0	3.54331	3	13	1	140.9	6.84	1	2	1	0.0174581	0.0348857	0.0172921	0.023212	0.0101101
Q8NF37	Lysophosphatidylcholine acyltransferase 1	LPCAT1	0	2.43446	1	7	1	59.1	6.02	1	2	1	0.0174581	0.0348857	0.0172921	0.023212	0.0101101
B0YJ88	Radixin	RDX	0	4.11664	2	5	1	68.5	6.37	1	2	1	0.0174581	0.0348857	0.0172921	0.023212	0.0101101
Q08945	FACT complex subunit SSRP1	SSRP1	0	3.66714	2	5	1	81	6.87	1	2	1	0.0174581	0.0348857	0.0172921	0.023212	0.0101101
P31689	DnaJ homolog subfamily A member 1	DNAJA1	0	9.57179	3	27	1	44.8	7.08	2	1	1	0.0349162	0.0174429	0.0172921	0.023217	0.010132	2	1	2	0.0571755	0.0285225	0.0589797	0.0482259	0.0170874									2	1	2	0.0670916	0.0312793	0.064	0.0541236	0.0198441
S4R3N1	HSPE1-MOB4 readthrough	HSPE1-MOB4	0	5.36398	1	19	1	29.7	6.16	2	1	1	0.0349162	0.0174429	0.0172921	0.023217	0.010132																									1	1	1	0.0175439	0.0190512	0.0174917	0.0180289	0.000885735
O94973	AP-2 complex subunit alpha-2	AP2A2	0	3.51438	2	10	1	103.9	6.96	2	1	1	0.0349162	0.0174429	0.0172921	0.023217	0.010132
B4E0L0	cDNA FLJ54030, highly similar to Polymerase delta-interacting protein 3		0	6.16438	2	6	1	48.1	9.92	2	1	1	0.0349162	0.0174429	0.0172921	0.023217	0.010132
Q9Y3Y2	Chromatin target of PRMT1 protein	CHTOP	0	10.4839	2	10	1	26.4	12.23	2	1	1	0.0349162	0.0174429	0.0172921	0.023217	0.010132
Q13242	Serine/arginine-rich splicing factor 9	SRSF9	0	14.4796	3	6	1	25.5	8.65	2	1	1	0.0349162	0.0174429	0.0172921	0.023217	0.010132
B7Z4C8	60S ribosomal protein L31	RPL31	0	17.6923	2	41	1	15.1	10.37	2	3	2	0.0349162	0.0523286	0.0345841	0.0406097	0.0101503	1	2	2	0.0285878	0.0570451	0.0589797	0.0482042	0.0170158									3	2	2	0.100637	0.0625586	0.064	0.075732	0.0215807
Q16891	MICOS complex subunit MIC60	IMMT	0	12.1372	8	43	1	83.6	6.48	2	3	2	0.0349162	0.0523286	0.0345841	0.0406097	0.0101503	2	2	3	0.0571755	0.0570451	0.0884695	0.0675634	0.0181053									3	4	2	0.100637	0.125117	0.064	0.0965849	0.0307595	2	4	2	0.0350877	0.076205	0.0349834	0.0487587	0.0237692
A6NHL2	Tubulin alpha chain-like 3	TUBAL3	0	8.29596	4	55	1	49.9	6.05	2	3	2	0.0349162	0.0523286	0.0345841	0.0406097	0.0101503	3	4	5	0.0857633	0.11409	0.147449	0.115768	0.0308771	2	3	2	0.0787092	0.112444	0.0807428	0.0906319	0.018917	4	4	4	0.134183	0.125117	0.128	0.1291	0.00463198	1	2	2	0.0175439	0.0381025	0.0349834	0.0302099	0.0110794
E7EVA0	Microtubule-associated protein	MAP4	0	1.95908	3	13	1	245.3	6.23	2	3	2	0.0349162	0.0523286	0.0345841	0.0406097	0.0101503																									1	1	1	0.0175439	0.0190512	0.0174917	0.0180289	0.000885735
B2R8R5	cDNA, FLJ94025, highly similar to Homo sapiens tripartite motif-containing 28 (TRIM28), mRNA		0	8.26347	5	23	1	88.5	5.77	2	3	2	0.0349162	0.0523286	0.0345841	0.0406097	0.0101503																									2	1	2	0.0350877	0.0190512	0.0349834	0.0297075	0.00922869
B7Z809	cDNA FLJ56016, highly similar to C-1-tetrahydrofolate synthase, cytoplasmic		0	5	4	15	1	110.4	8.56	2	3	2	0.0349162	0.0523286	0.0345841	0.0406097	0.0101503
P36542	ATP synthase subunit gamma, mitochondrial	ATP5C1	0	14.094	4	33	1	33	9.22	2	2	1	0.0349162	0.0348857	0.0172921	0.0290313	0.0101665																									4	2	4	0.0701754	0.0381025	0.0699668	0.0594149	0.0184574
Q9NR30	Nucleolar RNA helicase 2	DDX21	0	3.32056	2	12	1	87.3	9.28	2	2	1	0.0349162	0.0348857	0.0172921	0.0290313	0.0101665																									1	1	1	0.0175439	0.0190512	0.0174917	0.0180289	0.000885735
J3KPP4	Cisplatin resistance-associated overexpressed protein, isoform CRA_b	LUC7L3	0	6.54397	2	22	1	58.2	9.92	2	2	1	0.0349162	0.0348857	0.0172921	0.0290313	0.0101665																									2	1	3	0.0350877	0.0190512	0.0524751	0.035538	0.0167165
B2R6J2	cDNA, FLJ92973, highly similar to Homo sapiens villin 2 (ezrin) (VIL2), mRNA		0	6.31399	3	9	1	69.4	6.27	2	2	1	0.0349162	0.0348857	0.0172921	0.0290313	0.0101665
P27708	CAD protein	CAD	0	2.24719	3	9	1	242.8	6.46	2	2	1	0.0349162	0.0348857	0.0172921	0.0290313	0.0101665
Q0KKI6	Immunoblobulin light chain (Fragment)		0	9.58904	2	57	1	24	8.06	3	2	2	0.0523743	0.0348857	0.0345841	0.0406147	0.0101852	3	5	4	0.0857633	0.142613	0.117959	0.115445	0.028508	2	4	2	0.0787092	0.149925	0.0807428	0.103126	0.0405422	2	4	4	0.0670916	0.125117	0.128	0.106736	0.0343636	2	1	2	0.0350877	0.0190512	0.0349834	0.0297075	0.00922869
Q59EI9	ADP,ATP carrier protein, liver isoform T2 variant (Fragment)		0	13.9319	4	33	1	35.4	9.85	3	2	2	0.0523743	0.0348857	0.0345841	0.0406147	0.0101852
E5KNY5	Leucine-rich PPR-motif containing	LRPPRC	0	3.01291	3	25	1	157.8	6.13	3	2	2	0.0523743	0.0348857	0.0345841	0.0406147	0.0101852																									2	3	2	0.0350877	0.0571537	0.0349834	0.0424083	0.0127701
Q15717	ELAV-like protein 1	ELAVL1	0	10.7362	3	20	1	36.1	9.17	3	2	2	0.0523743	0.0348857	0.0345841	0.0406147	0.0101852
Q96AG4	Leucine-rich repeat-containing protein 59	LRRC59	0	20.5212	6	27	1	34.9	9.57	3	2	2	0.0523743	0.0348857	0.0345841	0.0406147	0.0101852
P03243	E1B 55 kDa protein		0	13.1048	6	52	1	55	7.3	3	4	3	0.0523743	0.0697715	0.0518762	0.0580073	0.0101911	1	2	2	0.0285878	0.0570451	0.0589797	0.0482042	0.0170158	3	2	3	0.118064	0.0749625	0.121114	0.104714	0.0258102	4	3	2	0.134183	0.093838	0.064	0.0973404	0.0352224	3	2	2	0.0526316	0.0381025	0.0349834	0.0419058	0.00941879
Q86UE4	Protein LYRIC	MTDH	0	8.93471	4	20	1	63.8	9.32	3	4	3	0.0523743	0.0697715	0.0518762	0.0580073	0.0101911
B2R4R9	HCG26477	RPS28	0	46.3768	3	68	1	7.8	10.7	4	5	4	0.0698324	0.0872144	0.0691683	0.075405	0.0102326	4	2	3	0.114351	0.0570451	0.0884695	0.0866219	0.0286976	2	4	2	0.0787092	0.149925	0.0807428	0.103126	0.0405422	3	4	3	0.100637	0.125117	0.096	0.107252	0.015645	6	6	3	0.105263	0.114307	0.0524751	0.0906819	0.0333957
P62861	40S ribosomal protein S30	FAU	0	33.8983	4	101	1	6.6	12.15	4	3	3	0.0698324	0.0523286	0.0518762	0.0580124	0.0102389	1	1	5	0.0285878	0.0285225	0.147449	0.0681865	0.0686435																	5	6	5	0.0877193	0.114307	0.0874585	0.0964951	0.0154265
A0A087WTP3	Far upstream element-binding protein 2	KHSRP	0	11.1111	6	38	1	73	7.71	4	3	3	0.0698324	0.0523286	0.0518762	0.0580124	0.0102389	1	1	1	0.0285878	0.0285225	0.0294898	0.0288667	0.000540621																	5	2	1	0.0877193	0.0381025	0.0174917	0.0477712	0.0360984
A8K9C4	Elongation factor 1-alpha		0	13.8528	5	100	1	50.2	9.01	3	3	2	0.0523743	0.0523286	0.0345841	0.046429	0.010258	8	4	8	0.228702	0.11409	0.235919	0.192904	0.0683498	4	7	7	0.157418	0.262369	0.2826	0.234129	0.0671991	5	7	4	0.167729	0.218955	0.128	0.171561	0.0455986	4	2	3	0.0701754	0.0381025	0.0524751	0.0535843	0.0160652
Q92522	Histone H1x	H1FX	0	22.5352	4	41	1	22.5	10.76	3	3	2	0.0523743	0.0523286	0.0345841	0.046429	0.010258																									1	2	1	0.0175439	0.0381025	0.0174917	0.0243793	0.0118846
Q14203	Dynactin subunit 1	DCTN1	0	6.10329	6	16	1	141.6	5.81	3	3	2	0.0523743	0.0523286	0.0345841	0.046429	0.010258
Q96GA3	Protein LTV1 homolog	LTV1	0	4	1	17	1	54.8	4.91	3	3	2	0.0523743	0.0523286	0.0345841	0.046429	0.010258
P23396	40S ribosomal protein S3	RPS3	0	44.4444	9	136	1	26.7	9.66	5	6	5	0.0872905	0.104657	0.0864603	0.0928027	0.0102747	8	8	15	0.228702	0.22818	0.442347	0.299743	0.123499	8	8	6	0.314837	0.29985	0.242229	0.285638	0.0383336	9	10	11	0.301912	0.312793	0.352	0.322235	0.026345	2	4	2	0.0350877	0.076205	0.0349834	0.0487587	0.0237692
A0A0S2Z5H3	Clathrin interactor 1 isoform 2 (Fragment)	CLINT1	0	10.8865	5	27	1	70.3	6.58	5	4	4	0.0872905	0.0697715	0.0691683	0.0754101	0.0102932																									2	3	5	0.0350877	0.0571537	0.0874585	0.0599	0.0262932
P62424	60S ribosomal protein L7a	RPL7A	0	26.3158	7	75	1	30	10.61	6	7	6	0.104749	0.1221	0.103752	0.1102	0.0103175	2	2	1	0.0571755	0.0570451	0.0294898	0.0479035	0.0159468									2	4	1	0.0670916	0.125117	0.032	0.0747363	0.047027	4	2	5	0.0701754	0.0381025	0.0874585	0.0652455	0.0250446
Q9BRT6	Protein LLP homolog	LLPH	0	29.4574	3	31	1	15.2	10.37	4	4	3	0.0698324	0.0697715	0.0518762	0.0638267	0.0103495																									2	4	2	0.0350877	0.076205	0.0349834	0.0487587	0.0237692
Q96HS1	Serine/threonine-protein phosphatase PGAM5, mitochondrial	PGAM5	0	10.7266	3	40	1	32	8.68	4	4	3	0.0698324	0.0697715	0.0518762	0.0638267	0.0103495																									3	3	4	0.0526316	0.0571537	0.0699668	0.0599174	0.00899196
Q13813	Spectrin alpha chain, non-erythrocytic 1	SPTAN1	0	22.2492	44	255	1	284.4	5.35	6	6	5	0.104749	0.104657	0.0864603	0.0986221	0.0105325	35	42	37	1.00057	1.19795	1.09112	1.09655	0.098799	5	5	13	0.196773	0.187406	0.524828	0.303003	0.192164	22	19	16	0.738007	0.594307	0.512	0.614772	0.114385	5	7	5	0.0877193	0.133359	0.0874585	0.102845	0.0264256
P26373	60S ribosomal protein L13	RPL13	0	39.3365	11	134	1	24.2	11.65	11	12	11	0.192039	0.209314	0.190213	0.197189	0.0105408	4	3	4	0.114351	0.0855676	0.117959	0.105959	0.0177517	2	2	3	0.0787092	0.0749625	0.121114	0.0915953	0.0256327	4	4	4	0.134183	0.125117	0.128	0.1291	0.00463198	10	12	9	0.175439	0.228615	0.157425	0.18716	0.0370139
A8K4W0	40S ribosomal protein S3a	RPS3A	0	40.1515	12	237	1	29.9	9.73	17	16	16	0.296788	0.279086	0.276673	0.284182	0.0109831	6	7	9	0.171527	0.199658	0.265408	0.212198	0.0481808	8	10	5	0.314837	0.374813	0.201857	0.297169	0.0878209	9	6	10	0.301912	0.187676	0.32	0.269863	0.0717481	13	12	16	0.22807	0.228615	0.279867	0.245517	0.0297489
A0A024R7T3	Heterogeneous nuclear ribonucleoprotein F, isoform CRA_a	HNRPF	0	18.3133	5	161	1	45.6	5.58	13	12	14	0.226955	0.209314	0.242089	0.22612	0.0164032	6	5	4	0.171527	0.142613	0.117959	0.144033	0.0268119	6	7	3	0.236128	0.262369	0.121114	0.206537	0.0751327	5	6	6	0.167729	0.187676	0.192	0.182468	0.0129465	11	10	14	0.192982	0.190512	0.244884	0.20946	0.0307031
B7Z596	Tropomyosin alpha-1 chain	TPM1	0	22.1818	6	111	1	31.7	4.89	7	6	8	0.122207	0.104657	0.138337	0.121733	0.0168446	7	7	6	0.200114	0.199658	0.176939	0.192237	0.0132505	5	4	6	0.196773	0.149925	0.242229	0.196309	0.0461535	8	5	7	0.268366	0.156397	0.224	0.216254	0.0563853	6	4	5	0.105263	0.076205	0.0874585	0.0896422	0.0146516
Q92614	Unconventional myosin-XVIIIa	MYO18A	0	15.3359	24	152	1	233	6.3	6	5	7	0.104749	0.0872144	0.121044	0.104336	0.0169188	21	20	24	0.600343	0.570451	0.707756	0.626183	0.0722078	2	1	1	0.0787092	0.0374813	0.0403714	0.0521873	0.023014	10	9	2	0.335458	0.281514	0.064	0.226991	0.143708	10	9	8	0.175439	0.171461	0.139934	0.162278	0.0194526
Q6ZN40	Tropomyosin 1 (Alpha), isoform CRA_f	TPM1	0	15.6442	5	60	1	37.4	4.72	5	4	6	0.0872905	0.0697715	0.103752	0.0869381	0.0169932	3	5	2	0.0857633	0.142613	0.0589797	0.0957852	0.0427077	2	1	3	0.0787092	0.0374813	0.121114	0.0791016	0.0418179	3	2	2	0.100637	0.0625586	0.064	0.075732	0.0215807	3	3	3	0.0526316	0.0571537	0.0524751	0.0540868	0.0026572
Q92804	TATA-binding protein-associated factor 2N	TAF15	0	10.1351	3	64	1	61.8	8.02	2	3	4	0.0349162	0.0523286	0.0691683	0.0521377	0.0171268																									4	4	4	0.0701754	0.076205	0.0699668	0.0721157	0.00354294
A8K259	cDNA FLJ78501, highly similar to Homo sapiens serpin peptidase inhibitor, clade H (heat shock protein 47), member 1, (collagen binding protein 1) (SERPINH1), mRNA		0	15.5502	5	30	1	46.5	8.69	2	3	4	0.0349162	0.0523286	0.0691683	0.0521377	0.0171268																									2	3	3	0.0350877	0.0571537	0.0524751	0.0482388	0.011627
Q01844	RNA-binding protein EWS	EWSR1	0	8.07927	3	33	1	68.4	9.33	2	3	4	0.0349162	0.0523286	0.0691683	0.0521377	0.0171268																									3	2	3	0.0526316	0.0381025	0.0524751	0.0477364	0.00834356
B5BU08	U2 small nuclear RNA auxillary factor 1 isoform a	U2AF1	0	8.75	2	35	1	27.9	8.54	3	2	4	0.0523743	0.0348857	0.0691683	0.0521428	0.0171424																									2	2	3	0.0350877	0.0381025	0.0524751	0.0418884	0.00929139
P60174	Triosephosphate isomerase	TPI1	0	24.1259	5	50	1	30.8	5.92	1	2	3	0.0174581	0.0348857	0.0518762	0.03474	0.0172095	1	2	1	0.0285878	0.0570451	0.0294898	0.0383742	0.0161757	3	5	4	0.118064	0.187406	0.161486	0.155652	0.0350374	3	3	1	0.100637	0.093838	0.032	0.0754918	0.0378181
B3KM36	cDNA FLJ10153 fis, clone HEMBA1003417, highly similar to BAG family molecular chaperone regulator 2		0	13.2701	3	21	1	23.7	6.7	1	2	3	0.0174581	0.0348857	0.0518762	0.03474	0.0172095	1	1	1	0.0285878	0.0285225	0.0294898	0.0288667	0.000540621																	2	2	3	0.0350877	0.0381025	0.0524751	0.0418884	0.00929139
Q13151	Heterogeneous nuclear ribonucleoprotein A0	HNRNPA0	0	10.1639	2	24	1	30.8	9.29	2	1	3	0.0349162	0.0174429	0.0518762	0.0347451	0.0172173																									2	1	1	0.0350877	0.0190512	0.0174917	0.0238769	0.00974013
Q59EA2	Coronin (Fragment)		0	8.18363	4	29	1	56.3	8.19	2	1	3	0.0349162	0.0174429	0.0518762	0.0347451	0.0172173																									2	3	2	0.0350877	0.0571537	0.0349834	0.0424083	0.0127701
A8K7D9	Importin subunit alpha		0	12.2873	4	19	1	57.8	5.4	2	1	3	0.0349162	0.0174429	0.0518762	0.0347451	0.0172173	1	2	1	0.0285878	0.0570451	0.0294898	0.0383742	0.0161757																	2	1	1	0.0350877	0.0190512	0.0174917	0.0238769	0.00974013
Q13185	Chromobox protein homolog 3	CBX3	0	23.4973	3	13	1	20.8	5.33	2	1	3	0.0349162	0.0174429	0.0518762	0.0347451	0.0172173
P62701	40S ribosomal protein S4, X isoform	RPS4X	0	35.3612	9	367	1	29.6	10.15	16	18	17	0.27933	0.313972	0.293965	0.295755	0.0173903	20	18	17	0.571755	0.513406	0.501327	0.528829	0.0376624	17	18	16	0.669028	0.674663	0.645943	0.663211	0.015218	18	15	23	0.603824	0.46919	0.736	0.603005	0.133407	14	15	17	0.245614	0.285769	0.297359	0.276247	0.0271546
D3DQ70	SERPINE1 mRNA binding protein 1, isoform CRA_d	SERBP1	0	14.4086	5	179	1	50.9	9.33	9	11	10	0.157123	0.191872	0.172921	0.173972	0.0173982	3	5	2	0.0857633	0.142613	0.0589797	0.0957852	0.0427077	3	5	3	0.118064	0.187406	0.121114	0.142195	0.039184	6	7	6	0.201275	0.218955	0.192	0.204077	0.0136943	11	13	9	0.192982	0.247666	0.157425	0.199358	0.0454571
P55081	Microfibrillar-associated protein 1	MFAP1	0	27.3349	12	191	1	51.9	4.98	7	9	8	0.122207	0.156986	0.138337	0.139176	0.0174048	4	8	6	0.114351	0.22818	0.176939	0.173157	0.0570088	4	6	6	0.157418	0.224888	0.242229	0.208178	0.0448062	9	6	9	0.301912	0.187676	0.288	0.259196	0.0623276	11	10	10	0.192982	0.190512	0.174917	0.186137	0.00979529
A0A024R2K4	Leucine rich repeat (In FLII) interacting protein 2, isoform CRA_b	LRRFIP2	0	7.27763	4	51	1	84.1	6.98	5	7	6	0.0872905	0.1221	0.103752	0.104381	0.0174133																	3	2	2	0.100637	0.0625586	0.064	0.075732	0.0215807	4	4	5	0.0701754	0.076205	0.0874585	0.0779463	0.0087721
H0YKD8	60S ribosomal protein L28	RPL28	0	19.4118	5	51	1	19.1	11.46	5	7	6	0.0872905	0.1221	0.103752	0.104381	0.0174133																									6	4	4	0.105263	0.076205	0.0699668	0.0838116	0.0188376
B7Z6Z4	Myosin light polypeptide 6	MYL6	0	36.9748	9	418	1	26.7	5.08	26	28	27	0.453911	0.4884	0.466886	0.469732	0.0174202	16	10	10	0.457404	0.285225	0.294898	0.345843	0.0967362	15	10	12	0.590319	0.374813	0.484457	0.483196	0.107759	18	16	15	0.603824	0.500469	0.48	0.528098	0.0663748	20	23	23	0.350877	0.438179	0.402309	0.397122	0.0438813
P62854	40S ribosomal protein S26	RPS26	0	20.8696	2	73	1	13	11	3	5	4	0.0523743	0.0872144	0.0691683	0.0695856	0.0174238	1	1	2	0.0285878	0.0285225	0.0589797	0.0386966	0.0175656	2	2	2	0.0787092	0.0749625	0.0807428	0.0781382	0.00293216									4	7	4	0.0701754	0.133359	0.0699668	0.091167	0.0365393
P37802	Transgelin-2	TAGLN2	0	34.1709	5	35	1	22.4	8.25	3	5	4	0.0523743	0.0872144	0.0691683	0.0695856	0.0174238									2	3	1	0.0787092	0.112444	0.0403714	0.0771748	0.0360607
O14654	Insulin receptor substrate 4	IRS4	0	14.0016	11	47	1	133.7	8.44	3	5	4	0.0523743	0.0872144	0.0691683	0.0695856	0.0174238																									7	3	4	0.122807	0.0571537	0.0699668	0.0833092	0.0348009
B4DR52	Histone H2B		0	14.4578	2	39	1	18	10.32	2	4	3	0.0349162	0.0697715	0.0518762	0.052188	0.0174297																									3	4	5	0.0526316	0.076205	0.0874585	0.0720983	0.0177729
P14625	Endoplasmin	HSP90B1	0	11.7061	8	84	1	92.4	4.84	1	3	2	0.0174581	0.0523286	0.0345841	0.0347903	0.0174362	5	1	2	0.142939	0.0285225	0.0589797	0.0768137	0.0592563	6	3	5	0.236128	0.112444	0.201857	0.183476	0.0638577	4	3	2	0.134183	0.093838	0.064	0.0973404	0.0352224
Q9H2W6	39S ribosomal protein L46, mitochondrial	MRPL46	0	13.2616	3	18	1	31.7	7.05	1	3	2	0.0174581	0.0523286	0.0345841	0.0347903	0.0174362																									1	1	1	0.0175439	0.0190512	0.0174917	0.0180289	0.000885735
P48047	ATP synthase subunit O, mitochondrial	ATP5O	0	17.8404	3	11	1	23.3	9.96	3	1	2	0.0523743	0.0174429	0.0345841	0.0348004	0.0174667
Q6NVC0	SLC25A5 protein (Fragment)	SLC25A5	0	13.9319	4	66	1	35.3	9.82	5	3	4	0.0872905	0.0523286	0.0691683	0.0695958	0.0174849	1	1	1	0.0285878	0.0285225	0.0294898	0.0288667	0.000540621	1	2	1	0.0393546	0.0749625	0.0403714	0.0515628	0.0202711	4	1	4	0.134183	0.0312793	0.128	0.0978208	0.0577095	2	1	2	0.0350877	0.0190512	0.0349834	0.0297075	0.00922869
O43175	D-3-phosphoglycerate dehydrogenase	PHGDH	0	13.5084	6	71	1	56.6	6.71	5	3	4	0.0872905	0.0523286	0.0691683	0.0695958	0.0174849	3	4	4	0.0857633	0.11409	0.117959	0.105938	0.0175782	2	5	2	0.0787092	0.187406	0.0807428	0.115619	0.0621776	7	3	5	0.234821	0.093838	0.16	0.162886	0.0705356
Q14444	Caprin-1	CAPRIN1	0	5.78279	4	37	1	78.3	5.25	5	3	4	0.0872905	0.0523286	0.0691683	0.0695958	0.0174849																									4	1	2	0.0701754	0.0190512	0.0349834	0.0414034	0.0261598
P28289	Tropomodulin-1	TMOD1	0	31.4763	8	51	1	40.5	5.1	6	4	5	0.104749	0.0697715	0.0864603	0.0869935	0.0174946																									6	6	7	0.105263	0.114307	0.122442	0.114004	0.00859336
P62280	40S ribosomal protein S11	RPS11	0	13.2911	3	64	1	18.4	10.3	2	3	1	0.0349162	0.0523286	0.0172921	0.0348456	0.0175184	5	5	4	0.142939	0.142613	0.117959	0.134504	0.0143287	6	4	5	0.236128	0.149925	0.201857	0.19597	0.0434017	6	5	4	0.201275	0.156397	0.128	0.16189	0.036945	4	2	3	0.0701754	0.0381025	0.0524751	0.0535843	0.0160652
O75947	ATP synthase subunit d, mitochondrial	ATP5H	0	20.4969	2	9	1	18.5	5.3	2	3	1	0.0349162	0.0523286	0.0172921	0.0348456	0.0175184
Q4LE64	NUMA1 variant protein (Fragment)	NUMA1 variant protein	0	5.32768	8	32	1	238.7	5.81	3	2	1	0.0523743	0.0348857	0.0172921	0.0348507	0.0175411																									3	1	1	0.0526316	0.0190512	0.0174917	0.0297248	0.0198531
P26038	Moesin	MSN	0	12.1317	7	26	1	67.8	6.4	3	2	1	0.0523743	0.0348857	0.0172921	0.0348507	0.0175411																									2	2	2	0.0350877	0.0381025	0.0349834	0.0360579	0.00177147
O00159	Unconventional myosin-Ic	MYO1C	0	8.37253	6	24	1	121.6	9.41	3	2	1	0.0523743	0.0348857	0.0172921	0.0348507	0.0175411																									1	1	3	0.0175439	0.0190512	0.0524751	0.0296901	0.0197468
O14602	Eukaryotic translation initiation factor 1A, Y-chromosomal	EIF1AY	0	20.8333	3	19	1	16.4	5.24	3	2	1	0.0523743	0.0348857	0.0172921	0.0348507	0.0175411																									2	1	1	0.0350877	0.0190512	0.0174917	0.0238769	0.00974013
O95782	AP-2 complex subunit alpha-1	AP2A1	0	5.62948	4	14	1	107.5	7.03	3	2	1	0.0523743	0.0348857	0.0172921	0.0348507	0.0175411
V9HWB8	Pyruvate kinase	HEL-S-30	0	23.3522	10	59	1	57.9	7.84	3	4	2	0.0523743	0.0697715	0.0345841	0.0522433	0.0175941	1	1	2	0.0285878	0.0285225	0.0589797	0.0386966	0.0175656																	4	6	1	0.0701754	0.114307	0.0174917	0.0673249	0.0484708
A8MXP9	Matrin-3	MATR3	0	5.47486	3	16	1	99.9	6.04	3	4	2	0.0523743	0.0697715	0.0345841	0.0522433	0.0175941
Q53G49	Ribosomal protein L19 (Fragment)		0	18.8776	4	58	1	23.5	11.4	4	3	2	0.0698324	0.0523286	0.0345841	0.0522484	0.0176243	2	1	2	0.0571755	0.0285225	0.0589797	0.0482259	0.0170874	1	2	3	0.0393546	0.0749625	0.121114	0.0784771	0.040993	2	1	3	0.0670916	0.0312793	0.096	0.0647903	0.0324216	2	3	1	0.0350877	0.0571537	0.0174917	0.0365777	0.019873
A0A024RDB4	Heterogeneous nuclear ribonucleoprotein D (AU-rich element RNA binding protein 1, 37kDa), isoform CRA_c	HNRPD	0	16.369	4	108	1	36.2	8.1	4	5	3	0.0698324	0.0872144	0.0518762	0.069641	0.0176699									2	2	1	0.0787092	0.0749625	0.0403714	0.064681	0.0211359									6	5	4	0.105263	0.0952562	0.0699668	0.0901621	0.0181913
P13010	X-ray repair cross-complementing protein 5	XRCC5	0	8.19672	5	56	1	82.7	5.81	4	5	3	0.0698324	0.0872144	0.0518762	0.069641	0.0176699									1	2	1	0.0393546	0.0749625	0.0403714	0.0515628	0.0202711									4	3	2	0.0701754	0.0571537	0.0349834	0.0541042	0.0177931
A4D0V4	Capping protein (Actin filament) muscle Z-line, alpha 2	CAPZA2	0	17.1329	4	40	1	32.9	5.85	4	5	3	0.0698324	0.0872144	0.0518762	0.069641	0.0176699																									5	4	3	0.0877193	0.076205	0.0524751	0.0721331	0.0179715
P42166	Lamina-associated polypeptide 2, isoform alpha	TMPO	0	13.6888	6	29	1	75.4	7.66	4	5	3	0.0698324	0.0872144	0.0518762	0.069641	0.0176699
Q53F64	Heterogeneous nuclear ribonucleoprotein AB isoform a variant (Fragment)		0	13.8554	4	113	1	36	7.42	5	6	4	0.0872905	0.104657	0.0691683	0.0870387	0.0177458	2	3	3	0.0571755	0.0855676	0.0884695	0.0770709	0.0172909	5	1	2	0.196773	0.0374813	0.0807428	0.104999	0.0823695	3	1	3	0.100637	0.0312793	0.096	0.0759722	0.0387746	6	6	5	0.105263	0.114307	0.0874585	0.102343	0.0136606
A0A024R4K3	Malate dehydrogenase	MDH2	0	25.1479	6	46	1	35.5	8.68	5	6	4	0.0872905	0.104657	0.0691683	0.0870387	0.0177458									1	2	1	0.0393546	0.0749625	0.0403714	0.0515628	0.0202711									1	3	3	0.0175439	0.0571537	0.0524751	0.0423909	0.0216449
P06396	Gelsolin	GSN	0	11.3811	6	34	1	85.6	6.28	5	6	4	0.0872905	0.104657	0.0691683	0.0870387	0.0177458																									2	3	3	0.0350877	0.0571537	0.0524751	0.0482388	0.011627
E9PAV3	Nascent polypeptide-associated complex subunit alpha, muscle-specific form	NACA	0	3.36862	5	207	1	205.3	9.58	10	9	8	0.174581	0.156986	0.138337	0.156634	0.0181248	8	12	9	0.228702	0.34227	0.265408	0.278794	0.0579553	10	9	9	0.393546	0.337331	0.363343	0.36474	0.0281333	10	7	10	0.335458	0.218955	0.32	0.291471	0.0632743	10	8	13	0.175439	0.15241	0.227392	0.18508	0.0384096
Q59GY2	Ribosomal protein L4 variant (Fragment)		0	22.9025	9	115	1	49	11.02	10	11	9	0.174581	0.191872	0.155629	0.174027	0.0181279	1	1	2	0.0285878	0.0285225	0.0589797	0.0386966	0.0175656	3	2	1	0.118064	0.0749625	0.0403714	0.0777992	0.0389238	5	4	2	0.167729	0.125117	0.064	0.118949	0.0521389	6	6	4	0.105263	0.114307	0.0699668	0.0965125	0.0234298
Q8N1C8	HSPA9 protein (Fragment)	HSPA9	0	24.5228	13	173	1	73.8	6.37	11	12	10	0.192039	0.209314	0.172921	0.191425	0.0182047	4	4	1	0.114351	0.11409	0.0294898	0.085977	0.0489195	1	1	1	0.0393546	0.0374813	0.0403714	0.0390691	0.00146608	2	5	3	0.0670916	0.156397	0.096	0.106496	0.0455683	11	12	12	0.192982	0.228615	0.2099	0.210499	0.0178238
A0A0D9SF53	ATP-dependent RNA helicase DDX3X	DDX3X	0	22.2374	14	171	1	81.4	8.07	11	12	10	0.192039	0.209314	0.172921	0.191425	0.0182047	8	6	10	0.228702	0.171135	0.294898	0.231579	0.0619316	5	9	8	0.196773	0.337331	0.322971	0.285692	0.0773401	10	12	9	0.335458	0.375352	0.288	0.332937	0.0437305	8	6	6	0.140351	0.114307	0.10495	0.11987	0.0183441
A0A0A0MRM8	Unconventional myosin-VI	MYO6	0	16.4405	16	121	1	144.9	8.56	12	11	10	0.209497	0.191872	0.172921	0.19143	0.0182923	2	4	3	0.0571755	0.11409	0.0884695	0.0865784	0.0285044																	9	13	14	0.157895	0.247666	0.244884	0.216815	0.0510453
Q5HYL6	Putative uncharacterized protein DKFZp686E1899	DKFZp686E1899	0	38.3523	11	201	1	39.5	5.19	18	19	17	0.314246	0.331415	0.293965	0.313208	0.0187463	4	4	5	0.114351	0.11409	0.147449	0.125297	0.0191849	2	2	1	0.0787092	0.0749625	0.0403714	0.064681	0.0211359	7	2	4	0.234821	0.0625586	0.128	0.141793	0.0869553	22	20	23	0.385965	0.381025	0.402309	0.389766	0.0111395
A0A024R1Q8	Ribosomal protein L23, isoform CRA_b	RPL23	0	52.8571	6	407	1	14.9	10.51	12	12	14	0.209497	0.209314	0.242089	0.2203	0.0188698	28	39	33	0.800457	1.11238	0.973164	0.962	0.15626	35	30	32	1.37741	1.12444	1.29189	1.26458	0.128678	25	26	29	0.838645	0.813262	0.928	0.859969	0.0602679	6	11	12	0.105263	0.209564	0.2099	0.174909	0.0603154
P46781	40S ribosomal protein S9	RPS9	0	39.1753	8	92	1	22.6	10.65	5	5	7	0.0872905	0.0872144	0.121044	0.0985164	0.0195099	5	4	3	0.142939	0.11409	0.0884695	0.115166	0.0272506	2	1	2	0.0787092	0.0374813	0.0807428	0.0656444	0.0244112	5	4	3	0.167729	0.125117	0.096	0.129615	0.0360754	5	5	3	0.0877193	0.0952562	0.0524751	0.0784835	0.0228371
B2R4P2	cDNA, FLJ92164, highly similar to Homo sapiens peroxiredoxin 1 (PRDX1), mRNA		0	31.6583	6	111	1	22.2	8.38	4	4	6	0.0698324	0.0697715	0.103752	0.0811188	0.0196013	4	3	2	0.114351	0.0855676	0.0589797	0.0862994	0.027693	5	5	6	0.196773	0.187406	0.242229	0.208803	0.0293241	4	5	1	0.134183	0.156397	0.032	0.107527	0.0663442	4	2	2	0.0701754	0.0381025	0.0349834	0.0477538	0.0194803
A0A0S2Z4G4	Tropomyosin 3 isoform 1 (Fragment)	TPM3	0	39.1129	11	190	1	29	4.78	13	11	13	0.226955	0.191872	0.224797	0.214541	0.0196621	11	13	11	0.314465	0.370793	0.324388	0.336549	0.0300684	9	7	8	0.354191	0.262369	0.322971	0.313177	0.0466882	13	12	8	0.436095	0.375352	0.256	0.355816	0.0916233	8	9	9	0.140351	0.171461	0.157425	0.156412	0.0155799
Q13344	Fus-like protein (Fragment)		0	3.0303	2	58	1	53.3	9.42	2	2	4	0.0349162	0.0348857	0.0691683	0.0463234	0.0197842																									2	3	4	0.0350877	0.0571537	0.0699668	0.0540694	0.0176429
A7BI36	p180/ribosome receptor	RRBP1	0	5.19481	6	26	1	165.6	8.97	2	2	4	0.0349162	0.0348857	0.0691683	0.0463234	0.0197842																									2	1	2	0.0350877	0.0190512	0.0349834	0.0297075	0.00922869
A0A0S2Z491	Nucleophosmin isoform 2 (Fragment)	NPM1	0	26.5306	5	60	1	32.6	4.78	5	7	7	0.0872905	0.1221	0.121044	0.110145	0.0197996																									4	4	3	0.0701754	0.076205	0.0524751	0.0662852	0.012334
P67936	Tropomyosin alpha-4 chain	TPM4	0	32.2581	10	97	1	28.5	4.69	8	6	8	0.139665	0.104657	0.138337	0.127553	0.0198393	5	8	4	0.142939	0.22818	0.117959	0.163026	0.0577909	3	2	4	0.118064	0.0749625	0.161486	0.118171	0.0432617	5	4	4	0.167729	0.125117	0.128	0.140282	0.0238133	4	4	5	0.0701754	0.076205	0.0874585	0.0779463	0.0087721
A0A024R814	Ribosomal protein L7, isoform CRA_a	RPL7	0	16.9884	4	51	1	30.4	10.71	4	6	6	0.0698324	0.104657	0.103752	0.0927473	0.0198501	1	1	1	0.0285878	0.0285225	0.0294898	0.0288667	0.000540621									1	1	1	0.0335458	0.0312793	0.032	0.032275	0.00115799	1	3	3	0.0175439	0.0571537	0.0524751	0.0423909	0.0216449
J3KTL2	Serine/arginine-rich-splicing factor 1	SRSF1	0	35.5731	8	55	1	28.3	10.08	4	6	6	0.0698324	0.104657	0.103752	0.0927473	0.0198501																									3	3	5	0.0526316	0.0571537	0.0874585	0.0657479	0.0189373
F8W7C6	60S ribosomal protein L10	RPL10	0	26.3804	3	43	1	18.6	9.95	1	1	3	0.0174581	0.0174429	0.0518762	0.0289257	0.0198757	3	3	2	0.0857633	0.0855676	0.0589797	0.0767702	0.0154074	2	4	4	0.0787092	0.149925	0.161486	0.13004	0.044828	4	3	3	0.134183	0.093838	0.096	0.108007	0.0226949	1	1	1	0.0175439	0.0190512	0.0174917	0.0180289	0.000885735
A0A087WVQ6	Clathrin heavy chain	CLTC	0	2.02501	3	13	1	191.9	5.69	1	1	3	0.0174581	0.0174429	0.0518762	0.0289257	0.0198757
V9HWK0	Signal recognition particle subunit SRP72	HEL103	0	4.91803	2	13	1	74.6	9.26	1	1	3	0.0174581	0.0174429	0.0518762	0.0289257	0.0198757
P15880	40S ribosomal protein S2	RPS2	0	10.5802	3	11	1	31.3	10.24	1	1	3	0.0174581	0.0174429	0.0518762	0.0289257	0.0198757
P04406	Glyceraldehyde-3-phosphate dehydrogenase	GAPDH	0	25.0746	6	118	1	36	8.46	7	5	7	0.122207	0.0872144	0.121044	0.110155	0.0198758	1	2	1	0.0285878	0.0570451	0.0294898	0.0383742	0.0161757	4	3	2	0.157418	0.112444	0.0807428	0.116868	0.0385288	2	1	2	0.0670916	0.0312793	0.064	0.0541236	0.0198441	6	6	7	0.105263	0.114307	0.122442	0.114004	0.00859336
A0A024R608	Ribosomal protein, large, P1, isoform CRA_a	RPLP1	0	28.9474	2	45	1	11.5	4.32	3	5	5	0.0523743	0.0872144	0.0864603	0.0753497	0.0199008	2	1	4	0.0571755	0.0285225	0.117959	0.0678858	0.0456702	1	2	1	0.0393546	0.0749625	0.0403714	0.0515628	0.0202711	4	1	1	0.134183	0.0312793	0.032	0.0658208	0.0592046	4	2	3	0.0701754	0.0381025	0.0524751	0.0535843	0.0160652
B3KSL5	cDNA FLJ36545 fis, clone TRACH2006670, highly similar to RNA-binding protein Luc7-like 2		0	18.1122	6	54	1	46.5	10.01	6	4	6	0.104749	0.0697715	0.103752	0.0927575	0.0199127																									4	4	8	0.0701754	0.076205	0.139934	0.095438	0.038652
Q9HBB3	60S ribosomal protein L6		0	22.1453	5	63	1	32.9	10.58	5	3	5	0.0872905	0.0523286	0.0864603	0.0753598	0.0199499	1	1	1	0.0285878	0.0285225	0.0294898	0.0288667	0.000540621	1	2	1	0.0393546	0.0749625	0.0403714	0.0515628	0.0202711									3	4	2	0.0526316	0.076205	0.0349834	0.0546067	0.0206817
P23246	Splicing factor, proline- and glutamine-rich	SFPQ	0	4.80905	3	62	1	76.1	9.44	4	2	4	0.0698324	0.0348857	0.0691683	0.0579621	0.0199875	1	3	4	0.0285878	0.0855676	0.117959	0.0773716	0.045246	1	3	1	0.0393546	0.112444	0.0403714	0.0640566	0.0419076	2	2	2	0.0670916	0.0625586	0.064	0.0645501	0.00231599	3	3	3	0.0526316	0.0571537	0.0524751	0.0540868	0.0026572
F8W6H6	Unconventional myosin-Va	MYO5A	0	3.55795	5	22	1	215.2	8.51	1	3	3	0.0174581	0.0523286	0.0518762	0.0405543	0.0200032																									2	3	2	0.0350877	0.0571537	0.0349834	0.0424083	0.0127701
P27348	14-3-3 protein theta	YWHAQ	0	17.551	4	42	1	27.7	4.78	3	1	3	0.0523743	0.0174429	0.0518762	0.0405645	0.0200254	2	1	1	0.0571755	0.0285225	0.0294898	0.038396	0.0162708	1	2	2	0.0393546	0.0749625	0.0807428	0.06502	0.022414	3	3	2	0.100637	0.093838	0.064	0.0861584	0.0194886	3	2	3	0.0526316	0.0381025	0.0524751	0.0477364	0.00834356
P22695	Cytochrome b-c1 complex subunit 2, mitochondrial	UQCRC2	0	22.2958	7	37	1	48.4	8.63	3	1	3	0.0523743	0.0174429	0.0518762	0.0405645	0.0200254	3	1	1	0.0857633	0.0285225	0.0294898	0.0479252	0.0327723	1	3	1	0.0393546	0.112444	0.0403714	0.0640566	0.0419076	4	2	2	0.134183	0.0625586	0.064	0.0869139	0.0409427	1	2	3	0.0175439	0.0381025	0.0524751	0.0360405	0.0175567
Q53G47	LUC7-like isoform b variant (Fragment)		0	16.1725	5	24	1	43.7	9.98	3	1	3	0.0523743	0.0174429	0.0518762	0.0405645	0.0200254																									2	2	3	0.0350877	0.0381025	0.0524751	0.0418884	0.00929139
Q13435	Splicing factor 3B subunit 2	SF3B2	0	6.36872	5	43	1	100.2	5.67	1	3	1	0.0174581	0.0523286	0.0172921	0.0290263	0.0201806	1	3	3	0.0285878	0.0855676	0.0884695	0.0675416	0.0337662	3	4	2	0.118064	0.149925	0.0807428	0.116244	0.034627	3	2	3	0.100637	0.0625586	0.096	0.0863987	0.0207759	2	2	2	0.0350877	0.0381025	0.0349834	0.0360579	0.00177147
B2R4C0	60S ribosomal protein L18a		0	19.8864	3	17	1	20.7	10.71	1	3	1	0.0174581	0.0523286	0.0172921	0.0290263	0.0201806
J3KQN4	60S ribosomal protein L36a	RPL36A	0	12.6761	2	32	1	16.4	10.43	3	1	1	0.0523743	0.0174429	0.0172921	0.0290364	0.0202113	3	3	2	0.0857633	0.0855676	0.0589797	0.0767702	0.0154074	1	1	1	0.0393546	0.0374813	0.0403714	0.0390691	0.00146608									2	1	3	0.0350877	0.0190512	0.0524751	0.035538	0.0167165
A0A140VK53	Testicular secretory protein Li 53		0	2.07122	4	20	1	299.4	12.06	3	1	1	0.0523743	0.0174429	0.0172921	0.0290364	0.0202113	1	1	1	0.0285878	0.0285225	0.0294898	0.0288667	0.000540621																	2	2	2	0.0350877	0.0381025	0.0349834	0.0360579	0.00177147
A0A0U1RRH7	Histone H2A		0	16.4706	2	78	1	18.5	11.52	2	4	2	0.0349162	0.0697715	0.0345841	0.0464239	0.0202203	2	4	3	0.0571755	0.11409	0.0884695	0.0865784	0.0285044	1	2	1	0.0393546	0.0749625	0.0403714	0.0515628	0.0202711	2	3	3	0.0670916	0.093838	0.096	0.0856432	0.0161025	5	2	4	0.0877193	0.0381025	0.0699668	0.0652629	0.0251406
Q99623	Prohibitin-2	PHB2	0	9.699	3	28	1	33.3	9.83	3	3	1	0.0523743	0.0523286	0.0172921	0.040665	0.0202416
Q14498	RNA-binding protein 39	RBM39	0	8.67925	3	15	1	59.3	10.1	3	3	1	0.0523743	0.0523286	0.0172921	0.040665	0.0202416
Q59G24	Activated RNA polymerase II transcription cofactor 4 variant (Fragment)		0	40.2985	6	48	1	15.1	9.38	4	2	2	0.0698324	0.0348857	0.0345841	0.0464341	0.0202641	2	3	2	0.0571755	0.0855676	0.0589797	0.0672409	0.015897	1	5	4	0.0393546	0.187406	0.161486	0.129416	0.0790645	3	2	1	0.100637	0.0625586	0.032	0.0650653	0.0343873	3	2	3	0.0526316	0.0381025	0.0524751	0.0477364	0.00834356
A0A024R5Z7	Annexin	ANXA2	0	23.3038	6	54	1	38.6	7.75	4	4	2	0.0698324	0.0697715	0.0345841	0.0580627	0.020333									2	1	1	0.0787092	0.0374813	0.0403714	0.0521873	0.023014	1	1	2	0.0335458	0.0312793	0.064	0.0429417	0.0182722	2	4	3	0.0350877	0.076205	0.0524751	0.0545893	0.02064
P62888	60S ribosomal protein L30	RPL30	0	49.5652	6	132	1	12.8	9.63	6	4	4	0.104749	0.0697715	0.0691683	0.0812295	0.0203704	8	5	3	0.228702	0.142613	0.0884695	0.153261	0.0707202									3	3	6	0.100637	0.093838	0.192	0.128825	0.0548166	4	5	5	0.0701754	0.0952562	0.0874585	0.0842967	0.0128359
A8K9L8	cDNA FLJ76964, highly similar to Homo sapiens tropomodulin 2 (neuronal) (TMOD2), mRNA		0	13.9601	4	90	1	39.6	5.27	7	9	7	0.122207	0.156986	0.121044	0.133412	0.0204235	2	3	3	0.0571755	0.0855676	0.0884695	0.0770709	0.0172909									3	2	3	0.100637	0.0625586	0.096	0.0863987	0.0207759	7	9	8	0.122807	0.171461	0.139934	0.144734	0.0246798
P11940	Polyadenylate-binding protein 1	PABPC1	0	14.4654	8	56	1	70.6	9.5	7	9	7	0.122207	0.156986	0.121044	0.133412	0.0204235																									3	3	2	0.0526316	0.0571537	0.0349834	0.0482562	0.0117149
A8K7N0	cDNA FLJ75556, highly similar to Homo sapiens ribosomal protein L14, mRNA		0	28.4404	5	95	1	23.6	10.84	7	5	5	0.122207	0.0872144	0.0864603	0.0986271	0.020424	1	1	1	0.0285878	0.0285225	0.0294898	0.0288667	0.000540621									2	2	3	0.0670916	0.0625586	0.096	0.0752167	0.018141	5	4	4	0.0877193	0.076205	0.0699668	0.0779637	0.00900599
A0A0C4DG17	40S ribosomal protein SA	RPSA	0	21.3333	5	128	1	33.3	4.87	7	5	5	0.122207	0.0872144	0.0864603	0.0986271	0.020424	4	4	4	0.114351	0.11409	0.117959	0.115467	0.00216248	7	3	5	0.275482	0.112444	0.201857	0.196594	0.0816465	3	4	3	0.100637	0.125117	0.096	0.107252	0.015645	4	6	3	0.0701754	0.114307	0.0524751	0.078986	0.0318439
B2R7W4	cDNA, FLJ93632, highly similar to Homo sapiens heterogeneous nuclear ribonucleoprotein R (HNRPR), mRNA		0	13.5861	7	54	1	70.9	7.74	7	5	5	0.122207	0.0872144	0.0864603	0.0986271	0.020424																									8	6	5	0.140351	0.114307	0.0874585	0.114039	0.0264472
P05387	60S acidic ribosomal protein P2	RPLP2	0	84.3478	6	119	1	11.7	4.54	10	8	8	0.174581	0.139543	0.138337	0.15082	0.0205863	6	5	8	0.171527	0.142613	0.235919	0.183353	0.0477639	2	2	5	0.0787092	0.0749625	0.201857	0.11851	0.0722054	7	4	4	0.234821	0.125117	0.128	0.162646	0.0625216	5	6	6	0.0877193	0.114307	0.10495	0.102326	0.013487
P62913	60S ribosomal protein L11	RPL11	0	25.8427	5	246	1	20.2	9.6	10	8	8	0.174581	0.139543	0.138337	0.15082	0.0205863	12	10	14	0.343053	0.285225	0.412858	0.347045	0.0639097	13	10	8	0.51161	0.374813	0.322971	0.403131	0.0974554	7	11	11	0.234821	0.344073	0.352	0.310298	0.0654852	7	7	11	0.122807	0.133359	0.192409	0.149525	0.0375113
A0A0A0MTS2	Glucose-6-phosphate isomerase (Fragment)	GPI	0	12.9145	6	57	1	64.8	9.04	7	7	5	0.122207	0.1221	0.0864603	0.110256	0.0206075																									3	7	7	0.0526316	0.133359	0.122442	0.102811	0.0437979
V9HWE1	Epididymis luminal protein 113	HEL113	0	63.5193	36	1458	1	53.6	5.12	83	85	86	1.44902	1.48264	1.48712	1.47293	0.0208234	56	58	58	1.60091	1.65431	1.71041	1.65521	0.0547531	25	24	30	0.983865	0.89955	1.21114	1.03152	0.16117	26	27	23	0.872191	0.844542	0.736	0.817577	0.071988	71	76	72	1.24561	1.44789	1.2594	1.31764	0.113017
Q59F66	DEAD box polypeptide 17 isoform p82 variant (Fragment)		0	17.7748	11	212	1	81	7.93	16	16	14	0.27933	0.279086	0.242089	0.266835	0.021431	6	6	10	0.171527	0.171135	0.294898	0.21252	0.0713419	5	10	7	0.196773	0.374813	0.2826	0.284728	0.0890389	8	8	11	0.268366	0.250235	0.352	0.2902	0.0542825	8	9	6	0.140351	0.171461	0.10495	0.138921	0.0332786
P35527	Keratin, type I cytoskeletal 9	KRT9	0	58.9085	29	2130	1	62	5.24	76	75	74	1.32682	1.30822	1.27961	1.30488	0.0237775	55	57	60	1.57233	1.62578	1.76939	1.65583	0.10191	78	79	71	3.06966	2.96102	2.86637	2.96568	0.101724	62	64	60	2.07984	2.00188	1.92	2.00057	0.0799275	92	85	97	1.61404	1.61936	1.69669	1.64336	0.0462637
B2R5W3	Poly [ADP-ribose] polymerase		0	20.4142	18	246	1	113	8.88	21	20	23	0.36662	0.348857	0.397717	0.371065	0.0247314	6	8	10	0.171527	0.22818	0.294898	0.231535	0.0617542	7	7	6	0.275482	0.262369	0.242229	0.260026	0.0167501	6	8	7	0.201275	0.250235	0.224	0.22517	0.0245009	14	15	15	0.245614	0.285769	0.262375	0.264586	0.0201684
P22626	Heterogeneous nuclear ribonucleoproteins A2/B1	HNRNPA2B1	0	33.711	10	227	1	37.4	8.95	14	16	17	0.244413	0.279086	0.293965	0.272488	0.0254262	3	3	5	0.0857633	0.0855676	0.147449	0.10626	0.035671	2	5	5	0.0787092	0.187406	0.201857	0.155991	0.0673168	5	3	7	0.167729	0.093838	0.224	0.161856	0.0652795	16	12	13	0.280702	0.228615	0.227392	0.24557	0.0304315
V9HW26	ATP synthase subunit alpha	HEL-S-123m	0	33.6347	15	291	1	59.7	9.13	10	11	13	0.174581	0.191872	0.224797	0.197083	0.0255103	7	8	3	0.200114	0.22818	0.0884695	0.172255	0.0739046	6	8	5	0.236128	0.29985	0.201857	0.245945	0.0497287	4	9	6	0.134183	0.281514	0.192	0.202566	0.0742315	13	8	15	0.22807	0.15241	0.262375	0.214285	0.0562638
Q59GE4	Ribosomal protein S10 variant (Fragment)		0	19.5402	4	93	1	19.8	9.91	9	10	12	0.157123	0.174429	0.207505	0.179685	0.025599																	1	1	1	0.0335458	0.0312793	0.032	0.032275	0.00115799	9	7	8	0.157895	0.133359	0.139934	0.143729	0.0127007
P55795	Heterogeneous nuclear ribonucleoprotein H2	HNRNPH2	0	13.363	4	139	1	49.2	6.3	9	8	11	0.157123	0.139543	0.190213	0.162293	0.0257274	3	4	3	0.0857633	0.11409	0.0884695	0.0961076	0.015632	2	2	2	0.0787092	0.0749625	0.0807428	0.0781382	0.00293216	1	4	1	0.0335458	0.125117	0.032	0.0635544	0.0533207	5	6	7	0.0877193	0.114307	0.122442	0.108156	0.0181602
P38159	RNA-binding motif protein, X chromosome	RBMX	0	14.8338	5	71	1	42.3	10.05	5	6	8	0.0872905	0.104657	0.138337	0.110095	0.0259538																									4	3	2	0.0701754	0.0571537	0.0349834	0.0541042	0.0177931
D3DRX6	Kinesin-like protein	KIF5B	0	9.96885	7	30	1	109.6	6.51	4	5	7	0.0698324	0.0872144	0.121044	0.0926971	0.0260425
P10809	60 kDa heat shock protein, mitochondrial	HSPD1	0	29.3194	13	149	1	61	5.87	4	6	7	0.0698324	0.104657	0.121044	0.0985114	0.0261533	4	5	1	0.114351	0.142613	0.0294898	0.0954845	0.0588741	7	8	4	0.275482	0.29985	0.161486	0.245606	0.0738621	1	5	6	0.0335458	0.156397	0.192	0.127314	0.0831341	5	6	3	0.0877193	0.114307	0.0524751	0.084834	0.031017
P26599	Polypyrimidine tract-binding protein 1	PTBP1	0	12.9944	5	36	1	57.2	9.17	3	2	5	0.0523743	0.0348857	0.0864603	0.0579068	0.0262286
Q53SS8	Epididymis secretory protein Li 85	PCBP1	0	21.9101	6	47	1	37.5	7.09	2	4	5	0.0349162	0.0697715	0.0864603	0.063716	0.0263002									1	1	1	0.0393546	0.0374813	0.0403714	0.0390691	0.00146608	1	2	1	0.0335458	0.0625586	0.032	0.0427015	0.0172142	6	4	4	0.105263	0.076205	0.0699668	0.0838116	0.0188376
B3KXM2	Serine/threonine-protein phosphatase		0	16.707	5	86	1	45.8	7.4	4	2	5	0.0698324	0.0348857	0.0864603	0.0637262	0.0263239	7	9	9	0.200114	0.256703	0.265408	0.240742	0.0354527	2	4	1	0.0787092	0.149925	0.0403714	0.0896685	0.055593	8	7	5	0.268366	0.218955	0.16	0.215774	0.0542532	4	5	6	0.0701754	0.0952562	0.10495	0.0901273	0.0179457
Q02413	Desmoglein-1	DSG1	0	5.05243	4	22	1	113.7	5.03	4	2	5	0.0698324	0.0348857	0.0864603	0.0637262	0.0263239
F4ZW62	NF45		0	24.359	6	33	1	43	5.26	4	7	6	0.0698324	0.1221	0.103752	0.0985616	0.0265177																									2	2	3	0.0350877	0.0381025	0.0524751	0.0418884	0.00929139
Q96T67	TOB3		0	13.1488	6	58	1	65.1	9.33	3	6	5	0.0523743	0.104657	0.0864603	0.081164	0.0265408	1	2	4	0.0285878	0.0570451	0.117959	0.067864	0.0456575	1	3	2	0.0393546	0.112444	0.0807428	0.0775137	0.0366514	2	4	1	0.0670916	0.125117	0.032	0.0747363	0.047027	4	3	5	0.0701754	0.0571537	0.0874585	0.0715959	0.0152022
Q5JR94	40S ribosomal protein S8	RPS8	0	28.8462	5	182	1	24.2	10.32	13	10	12	0.226955	0.174429	0.207505	0.202963	0.0265562	4	5	5	0.114351	0.142613	0.147449	0.134804	0.0178773	6	7	6	0.236128	0.262369	0.242229	0.246908	0.0137323	5	4	7	0.167729	0.125117	0.224	0.172282	0.0495983	11	10	9	0.192982	0.190512	0.157425	0.180307	0.0198544
D1CS55	Toll-like receptor 4	TLR4	0	20.5006	13	341	1	95.7	6.3	11	8	10	0.192039	0.139543	0.172921	0.168168	0.0265689	22	25	22	0.628931	0.713063	0.648776	0.66359	0.0439791	14	16	19	0.550964	0.5997	0.767057	0.63924	0.113343	20	20	21	0.670916	0.625586	0.672	0.656167	0.0264894	9	9	9	0.157895	0.171461	0.157425	0.16226	0.00797161
Q6IPH7	RPL14 protein	RPL14	0	32.7273	6	83	1	23.8	10.93	7	4	6	0.122207	0.0697715	0.103752	0.0985769	0.026598	1	2	2	0.0285878	0.0570451	0.0589797	0.0482042	0.0170158									1	1	1	0.0335458	0.0312793	0.032	0.032275	0.00115799	7	6	5	0.122807	0.114307	0.0874585	0.108191	0.018451
F8W0W8	Serine/threonine-protein phosphatase	PPP1CC	0	20.7831	5	101	1	38.2	6.83	6	3	5	0.104749	0.0523286	0.0864603	0.0811792	0.026606	7	9	9	0.200114	0.256703	0.265408	0.240742	0.0354527	2	5	3	0.0787092	0.187406	0.121114	0.129077	0.0547843	9	8	7	0.301912	0.250235	0.224	0.258716	0.0396424	5	6	7	0.0877193	0.114307	0.122442	0.108156	0.0181602
A0A024R321	Filamin B, beta (Actin binding protein 278), isoform CRA_a	FLNB	0	4.76735	9	48	1	280.3	5.94	4	1	3	0.0698324	0.0174429	0.0518762	0.0463838	0.0266231																									7	3	6	0.122807	0.0571537	0.10495	0.0949703	0.0339453
P04350	Tubulin beta-4A chain	TUBB4A	0	49.3243	16	773	1	49.6	4.88	36	36	39	0.628492	0.627943	0.67439	0.643609	0.0266593	41	38	38	1.1721	1.08386	1.12061	1.12552	0.0443254	26	23	22	1.02322	0.862069	0.888171	0.924486	0.0864954	41	38	41	1.37538	1.18861	1.312	1.292	0.0949747	33	28	35	0.578947	0.533435	0.612209	0.574864	0.0395456
J3QQ67	60S ribosomal protein L18 (Fragment)	RPL18	0	25.7895	5	127	1	21.8	11.72	4	7	5	0.0698324	0.1221	0.0864603	0.0927976	0.0267039	4	2	4	0.114351	0.0570451	0.117959	0.0964518	0.0341749	2	6	3	0.0787092	0.224888	0.121114	0.14157	0.0752055	3	2	3	0.100637	0.0625586	0.096	0.0863987	0.0207759	3	4	6	0.0526316	0.076205	0.10495	0.0779289	0.0262019
P62917	60S ribosomal protein L8	RPL8	0	10.5058	2	59	1	28	11.03	2	4	1	0.0349162	0.0697715	0.0172921	0.0406599	0.026707	1	2	1	0.0285878	0.0570451	0.0294898	0.0383742	0.0161757																	1	1	1	0.0175439	0.0190512	0.0174917	0.0180289	0.000885735
E9PB61	THO complex subunit 4	ALYREF	0	20.4545	3	37	1	27.5	11.05	5	2	3	0.0872905	0.0348857	0.0518762	0.0580175	0.0267367	1	2	1	0.0285878	0.0570451	0.0294898	0.0383742	0.0161757	3	1	2	0.118064	0.0374813	0.0807428	0.0787626	0.0403277	74	69							1	4	3	0.0175439	0.076205	0.0524751	0.0487413	0.0295083
A4D1G5	40S ribosomal protein S27	LOC392748	0	14.1892	2	27	1	16.9	9.55	4	2	1	0.0698324	0.0348857	0.0172921	0.0406701	0.0267435																	3	1	2	0.100637	0.0312793	0.064	0.0653056	0.0346974	2	2	1	0.0350877	0.0381025	0.0174917	0.0302273	0.0111319
A0A024RBH2	Cytoskeleton-associated protein 4, isoform CRA_c	CKAP4	0	17.1096	7	40	1	66	5.92	4	3	1	0.0698324	0.0523286	0.0172921	0.0464844	0.0267533																									2	3	2	0.0350877	0.0571537	0.0349834	0.0424083	0.0127701
P62277	40S ribosomal protein S13	RPS13	0	22.5166	4	50	1	17.2	10.54	6	3	4	0.104749	0.0523286	0.0691683	0.0754152	0.0267625	2	1	2	0.0571755	0.0285225	0.0589797	0.0482259	0.0170874	1	3	3	0.0393546	0.112444	0.121114	0.0909709	0.0449107	3	3	1	0.100637	0.093838	0.032	0.0754918	0.0378181	3	3	3	0.0526316	0.0571537	0.0524751	0.0540868	0.0026572
B2R8Z8	cDNA, FLJ94136, highly similar to Homo sapiens synaptotagmin binding, cytoplasmic RNA interacting protein (SYNCRIP), mRNA		0	13.1621	7	24	1	69.6	8.76	4	5	2	0.0698324	0.0872144	0.0345841	0.063877	0.0268158																									2	3	1	0.0350877	0.0571537	0.0174917	0.0365777	0.019873
B4DWA6	cDNA FLJ60094, highly similar to F-actin capping protein subunit beta		0	26.8657	9	80	1	37.5	6.14	10	7	8	0.174581	0.1221	0.138337	0.145006	0.0268686																									7	11	10	0.122807	0.209564	0.174917	0.169096	0.0436703
Q53H88	Dynactin 2 variant (Fragment)		0	23.399	7	47	1	44.8	5.12	5	6	3	0.0872905	0.104657	0.0518762	0.0812746	0.0268999																									4	5	8	0.0701754	0.0952562	0.139934	0.101788	0.0353348
B2RAH5	Protein phosphatase 1 regulatory subunit		0	23.3981	21	318	1	115.3	5.43	5	7	4	0.0872905	0.1221	0.0691683	0.092853	0.0269008	38	43	43	1.08634	1.22647	1.26806	1.19362	0.0952124	15	24	22	0.590319	0.89955	0.888171	0.79268	0.175342	32	33	28	1.07347	1.03222	0.896	1.00056	0.0928714	3	3	2	0.0526316	0.0571537	0.0349834	0.0482562	0.0117149
P30050	60S ribosomal protein L12	RPL12	0	42.4242	5	106	1	17.8	9.42	13	10	11	0.226955	0.174429	0.190213	0.197199	0.0269512	1	1	3	0.0285878	0.0285225	0.0884695	0.0485266	0.0345916	1	1	1	0.0393546	0.0374813	0.0403714	0.0390691	0.00146608	2	3	2	0.0670916	0.093838	0.064	0.0749765	0.0164075	9	9	6	0.157895	0.171461	0.10495	0.144769	0.0351447
P49411	Elongation factor Tu, mitochondrial	TUFM	0	28.3186	10	111	1	49.5	7.61	8	10	7	0.139665	0.174429	0.121044	0.145046	0.0270959	5	3	6	0.142939	0.0855676	0.176939	0.135148	0.0461811	3	3	1	0.118064	0.112444	0.0403714	0.090293	0.0433246	9	5	5	0.301912	0.156397	0.16	0.206103	0.0829928	8	3	11	0.140351	0.0571537	0.192409	0.129971	0.0682222
A0A0A6YYL6	Protein RPL17-C18orf32	RPL17-C18orf32	0	24.5614	5	137	1	26.4	10.1	9	11	8	0.157123	0.191872	0.138337	0.162444	0.0271613	8	8	7	0.228702	0.22818	0.206429	0.221104	0.0127115	5	7	7	0.196773	0.262369	0.2826	0.247247	0.0448672	5	7	5	0.167729	0.218955	0.16	0.182228	0.0320406	7	6	8	0.122807	0.114307	0.139934	0.125683	0.0130528
Q86Y46	Keratin, type II cytoskeletal 73	KRT73	0	9.25926	6	225	1	58.9	7.23	12	10	9	0.209497	0.174429	0.155629	0.179852	0.0273407	5	5	5	0.142939	0.142613	0.147449	0.144334	0.00270311	2	6	5	0.0787092	0.224888	0.201857	0.168485	0.0785959	6	4	3	0.201275	0.125117	0.096	0.140797	0.0543607	8	9	14	0.140351	0.171461	0.244884	0.185565	0.0536747
Q8WVX7	Ribosomal protein S19 (Fragment)		0	46.4968	8	189	1	17.3	10.52	12	13	10	0.209497	0.226757	0.172921	0.203058	0.0274899	2	1	1	0.0571755	0.0285225	0.0294898	0.038396	0.0162708	1	2	2	0.0393546	0.0749625	0.0807428	0.06502	0.022414	1	2	2	0.0335458	0.0625586	0.064	0.0533681	0.0171818	9	10	10	0.157895	0.190512	0.174917	0.174441	0.0163141
A0A024RAZ7	Heterogeneous nuclear ribonucleoprotein A1, isoform CRA_b	HNRPA1	0	21.7742	7	99	1	38.7	9.13	12	13	10	0.209497	0.226757	0.172921	0.203058	0.0274899																									4	9	6	0.0701754	0.171461	0.10495	0.115529	0.0514649
A3R0T7	Liver histone H1e		0	30.137	10	290	1	21.9	11.03	14	12	11	0.244413	0.209314	0.190213	0.214647	0.027491	6	4	6	0.171527	0.11409	0.176939	0.154185	0.0348287	6	7	4	0.236128	0.262369	0.161486	0.219994	0.0523409	8	9	7	0.268366	0.281514	0.224	0.25796	0.030136	9	6	11	0.157895	0.114307	0.192409	0.15487	0.0391383
G8JLB6	Heterogeneous nuclear ribonucleoprotein H	HNRNPH1	0	15.0424	5	207	1	51.2	6.8	13	13	16	0.226955	0.226757	0.276673	0.243462	0.0287618	7	7	4	0.200114	0.199658	0.117959	0.172577	0.047301	5	6	5	0.196773	0.224888	0.201857	0.207839	0.0149816	4	7	4	0.134183	0.218955	0.128	0.160379	0.0508222	8	10	11	0.140351	0.190512	0.192409	0.174424	0.0295234
P62979	Ubiquitin-40S ribosomal protein S27a	RPS27A	0	36.5385	4	82	1	18	9.64	6	6	9	0.104749	0.104657	0.155629	0.121678	0.029402	2	2	2	0.0571755	0.0570451	0.0589797	0.0577334	0.00108124	2	1	2	0.0787092	0.0374813	0.0807428	0.0656444	0.0244112	4	2	4	0.134183	0.0625586	0.128	0.108247	0.0396881	6	8	10	0.105263	0.15241	0.174917	0.144197	0.0355458
O43684	Mitotic checkpoint protein BUB3	BUB3	0	18.5976	5	51	1	37.1	6.84	4	4	7	0.0698324	0.0697715	0.121044	0.0868828	0.0295849																	2	4	3	0.0670916	0.125117	0.096	0.0960696	0.0290129	4	3	3	0.0701754	0.0571537	0.0524751	0.0599348	0.00917204
Q5EC54	Heterogeneous nuclear ribonucleoprotein K transcript variant	HNRPK	0	23.9224	8	128	1	51	5.33	5	8	8	0.0872905	0.139543	0.138337	0.121723	0.0298258	3	5	1	0.0857633	0.142613	0.0294898	0.0859553	0.0565617	3	5	2	0.118064	0.187406	0.0807428	0.128738	0.0541269	3	5	4	0.100637	0.156397	0.128	0.128345	0.0278812	6	4	5	0.105263	0.076205	0.0874585	0.0896422	0.0146516
Q15084	Protein disulfide-isomerase A6	PDIA6	0	21.1364	8	114	1	48.1	5.08	10	7	10	0.174581	0.1221	0.172921	0.156534	0.0298321	2	1	1	0.0571755	0.0285225	0.0294898	0.038396	0.0162708																	5	8	9	0.0877193	0.15241	0.157425	0.132518	0.0388779
Q2M2I5	Keratin, type I cytoskeletal 24	KRT24	0	5.33333	3	107	1	55.1	4.96	2	5	5	0.0349162	0.0872144	0.0864603	0.0695303	0.0299791									3	4	4	0.118064	0.149925	0.161486	0.143158	0.022488	3	3	3	0.100637	0.093838	0.096	0.0968251	0.00347398	3	6	5	0.0526316	0.114307	0.0874585	0.0847992	0.0309238
L0R588	Alternative protein C11orf48	C11orf48	0	16.3522	2	52	1	18.4	11.3	1	4	4	0.0174581	0.0697715	0.0691683	0.0521326	0.0300305																	1	1	1	0.0335458	0.0312793	0.032	0.032275	0.00115799	2	2	2	0.0350877	0.0381025	0.0349834	0.0360579	0.00177147
Q562R0	Actin-like protein (Fragment)	ACT	0	28.1553	2	28	1	11.5	6.35	4	1	4	0.0698324	0.0174429	0.0691683	0.0521478	0.0300572
B4DLN1	cDNA FLJ60124, highly similar to Mitochondrial dicarboxylate carrier		0	10.4072	2	14	1	48.1	9.52	4	1	1	0.0698324	0.0174429	0.0172921	0.0348558	0.0302907
O95831	Apoptosis-inducing factor 1, mitochondrial	AIFM1	0	13.0506	6	26	1	66.9	8.95	5	2	2	0.0872905	0.0348857	0.0345841	0.0522535	0.0303433	1	1	2	0.0285878	0.0285225	0.0589797	0.0386966	0.0175656									2	1	1	0.0670916	0.0312793	0.032	0.043457	0.0204713	1	1	1	0.0175439	0.0190512	0.0174917	0.0180289	0.000885735
Q59GK9	Ribosomal protein L21 variant (Fragment)		0	20.2454	2	40	1	18.9	10.54	5	5	2	0.0872905	0.0872144	0.0345841	0.0696963	0.0304081																									3	3	3	0.0526316	0.0571537	0.0524751	0.0540868	0.0026572
Q53GG0	Epithelial protein lost in neoplasm beta variant (Fragment)		0	40.0527	25	365	1	85.2	6.84	25	27	29	0.436453	0.470958	0.50147	0.469627	0.0325291	6	9	10	0.171527	0.256703	0.294898	0.241043	0.0631591	6	4	3	0.236128	0.149925	0.121114	0.169056	0.0598456	5	5	9	0.167729	0.156397	0.288	0.204042	0.0729303	44	43	39	0.77193	0.819204	0.682176	0.75777	0.0696026
V9HW04	Serine/threonine-protein phosphatase	HEL-S-80p	0	25.3823	6	127	1	37.2	6.19	4	2	6	0.0698324	0.0348857	0.103752	0.0694902	0.0344346	10	12	13	0.285878	0.34227	0.383368	0.337172	0.0489446	4	7	7	0.157418	0.262369	0.2826	0.234129	0.0671991	13	10	9	0.436095	0.312793	0.288	0.34563	0.0793203	5	7	7	0.0877193	0.133359	0.122442	0.114507	0.023832
A0A024QZK8	Heterogeneous nuclear ribonucleoprotein H3 (2H9), isoform CRA_a	HNRPH3	0	8.67052	2	24	1	36.9	6.87	4	2	6	0.0698324	0.0348857	0.103752	0.0694902	0.0344346
G3V1L9	Tight junction protein 1 (Zona occludens 1), isoform CRA_a	TJP1	0	6.3914	10	43	1	197.3	6.67	3	1	5	0.0523743	0.0174429	0.0864603	0.0520925	0.0345096	5	3	4	0.142939	0.0855676	0.117959	0.115489	0.0287653									4	3	4	0.134183	0.093838	0.128	0.118674	0.0217294
B2RA03	cDNA, FLJ94640, highly similar to Homo sapiens keratin 18 (KRT18), mRNA		0	16.5116	7	93	1	48	5.38	5	9	7	0.0872905	0.156986	0.121044	0.121774	0.0348534																									4	9	8	0.0701754	0.171461	0.139934	0.12719	0.0518315
A0A087X0X3	Heterogeneous nuclear ribonucleoprotein M	HNRNPM	0	33.0137	18	202	1	77.5	8.78	18	21	22	0.314246	0.3663	0.380425	0.353657	0.0348543																	1	2	1	0.0335458	0.0625586	0.032	0.0427015	0.0172142	16	19	11	0.280702	0.361974	0.192409	0.278361	0.0848068
P62081	40S ribosomal protein S7	RPS7	0	27.3196	7	100	1	22.1	10.1	5	1	3	0.0872905	0.0174429	0.0518762	0.0522032	0.034925	4	4	5	0.114351	0.11409	0.147449	0.125297	0.0191849	5	4	4	0.196773	0.149925	0.161486	0.169395	0.0244048	5	5	4	0.167729	0.156397	0.128	0.150709	0.0204661	4	3	4	0.0701754	0.0571537	0.0699668	0.0657653	0.00745857
Q04837	Single-stranded DNA-binding protein, mitochondrial	SSBP1	0	43.2432	5	59	1	17.2	9.6	7	9	5	0.122207	0.156986	0.0864603	0.121884	0.0352639																									3	1	4	0.0526316	0.0190512	0.0699668	0.0472165	0.0258861
P81605	Dermcidin	DCD	0	35.4545	4	171	1	11.3	6.54	11	9	7	0.192039	0.156986	0.121044	0.15669	0.0354983	4	2	3	0.114351	0.0570451	0.0884695	0.0866219	0.0286976	4	3	3	0.157418	0.112444	0.121114	0.130325	0.0238603	3	2	2	0.100637	0.0625586	0.064	0.075732	0.0215807	5	7	8	0.0877193	0.133359	0.139934	0.120337	0.0284386
B3KML9	cDNA FLJ11352 fis, clone HEMBA1000020, highly similar to Tubulin beta-2C chain		0	46.8514	16	1021	1	44.6	4.93	48	44	47	0.837989	0.767486	0.812727	0.806067	0.0357198	51	46	53	1.45798	1.31204	1.56296	1.44432	0.126018	42	32	32	1.65289	1.1994	1.29189	1.38139	0.23963	55	53	53	1.84502	1.6578	1.696	1.73294	0.098923	46	40	45	0.807018	0.76205	0.787126	0.785398	0.0225336
P16989	Y-box-binding protein 3	YBX3	0	13.7097	4	78	1	40.1	9.77	3	2	6	0.0523743	0.0348857	0.103752	0.0636708	0.0357961	4	6	4	0.114351	0.171135	0.117959	0.134482	0.031794	5	3	3	0.196773	0.112444	0.121114	0.143444	0.0463875	2	2	1	0.0670916	0.0625586	0.032	0.0538834	0.0190866	2	3	4	0.0350877	0.0571537	0.0699668	0.0540694	0.0176429
H0YH81	ATP synthase subunit beta (Fragment)	ATP5B	0	28.7293	7	74	1	38.2	5.55	1	2	5	0.0174581	0.0348857	0.0864603	0.0462681	0.0358817	7	3	6	0.200114	0.0855676	0.176939	0.154207	0.0605623	4	7	4	0.157418	0.262369	0.161486	0.193758	0.0594538	2	8	3	0.0670916	0.250235	0.096	0.137775	0.0984593	1	1	1	0.0175439	0.0190512	0.0174917	0.0180289	0.000885735
E7ETY2	Treacle protein	TCOF1	0	4.50269	5	72	1	152.2	8.85	1	5	4	0.0174581	0.0872144	0.0691683	0.0579469	0.0362067	2	1	2	0.0571755	0.0285225	0.0589797	0.0482259	0.0170874	1	1	2	0.0393546	0.0374813	0.0807428	0.0525262	0.0244542									4	2	3	0.0701754	0.0381025	0.0524751	0.0535843	0.0160652
B4DE59	cDNA FLJ60424, highly similar to Junction plakoglobin		0	14.3872	8	140	1	62.6	5.17	6	10	7	0.104749	0.174429	0.121044	0.133407	0.036448	4	8	4	0.114351	0.22818	0.117959	0.153497	0.0647029	4	5	4	0.157418	0.187406	0.161486	0.16877	0.016267	4	2	4	0.134183	0.0625586	0.128	0.108247	0.0396881	4	6	4	0.0701754	0.114307	0.0699668	0.0848166	0.0255401
M0QZM1	Heterogeneous nuclear ribonucleoprotein M (Fragment)	HNRNPM	0	37.5979	10	60	1	40	6.73	7	11	8	0.122207	0.191872	0.138337	0.150805	0.0364677																									8	6	4	0.140351	0.114307	0.0699668	0.108208	0.0355862
Q00839	Heterogeneous nuclear ribonucleoprotein U	HNRNPU	0	9.69697	5	55	1	90.5	6	7	4	3	0.122207	0.0697715	0.0518762	0.0812848	0.0365515									2	3	2	0.0787092	0.112444	0.0807428	0.0906319	0.018917	5	3	2	0.167729	0.093838	0.064	0.108522	0.0534008	2	3	3	0.0350877	0.0571537	0.0524751	0.0482388	0.011627
P62750	60S ribosomal protein L23a	RPL23A	0	42.9487	8	180	1	17.7	10.45	7	10	6	0.122207	0.174429	0.103752	0.133463	0.036658	6	6	4	0.171527	0.171135	0.117959	0.15354	0.0308147	8	8	7	0.314837	0.29985	0.2826	0.299096	0.0161316	8	7	8	0.268366	0.218955	0.256	0.247774	0.0257122	8	10	7	0.140351	0.190512	0.122442	0.151102	0.0352858
A8K0T9	cDNA FLJ75422, highly similar to Homo sapiens capping protein (actin filament) muscle Z-line, alpha 1, mRNA		0	34.965	6	131	1	32.9	5.69	9	12	8	0.157123	0.209314	0.138337	0.168258	0.0367758	5	6	3	0.142939	0.171135	0.0884695	0.134181	0.0420229	1	1	2	0.0393546	0.0374813	0.0807428	0.0525262	0.0244542	6	6	5	0.201275	0.187676	0.16	0.182984	0.0210337	13	8	13	0.22807	0.15241	0.227392	0.202624	0.043488
Q8IWP6	Tubulin beta chain		0	58.6517	19	1055	1	49.7	4.92	48	44	45	0.837989	0.767486	0.778143	0.794539	0.0380037	54	49	55	1.54374	1.3976	1.62194	1.52109	0.11387	43	33	32	1.69225	1.23688	1.29189	1.407	0.248553	57	55	55	1.91211	1.72036	1.76	1.79749	0.101222	43	42	43	0.754386	0.800152	0.752143	0.768894	0.0270941
A2A3R6	40S ribosomal protein S6	RPS6	0	30.1205	6	109	1	28.7	10.84	6	6	10	0.104749	0.104657	0.172921	0.127442	0.0393855	4	6	4	0.114351	0.171135	0.117959	0.134482	0.031794	3	8	7	0.118064	0.29985	0.2826	0.233505	0.100346	8	4	8	0.268366	0.125117	0.256	0.216495	0.0793762	2	5	3	0.0350877	0.0952562	0.0524751	0.0609397	0.0309645
P83731	60S ribosomal protein L24	RPL24	0	19.1083	3	82	1	17.8	11.25	4	8	4	0.0698324	0.139543	0.0691683	0.0928479	0.0404405	2	2	2	0.0571755	0.0570451	0.0589797	0.0577334	0.00108124									1	1	2	0.0335458	0.0312793	0.064	0.0429417	0.0182722	4	1	2	0.0701754	0.0190512	0.0349834	0.0414034	0.0261598
Q86YZ3	Hornerin	HRNR	0	24.807	23	209	1	282.2	10.04	14	12	17	0.244413	0.209314	0.293965	0.249231	0.0425304	5	4	4	0.142939	0.11409	0.117959	0.124996	0.0156588	4	8	4	0.157418	0.29985	0.161486	0.206251	0.0810844	3	4	4	0.100637	0.125117	0.128	0.117918	0.0150349	11	16	17	0.192982	0.30482	0.297359	0.265054	0.0625269
A8K9A4	cDNA FLJ75154, highly similar to Homo sapiens heterogeneous nuclear ribonucleoprotein C (C1/C2), mRNA		0	23.5294	7	76	1	33.6	5.14	6	8	11	0.104749	0.139543	0.190213	0.144835	0.0429771																									3	4	5	0.0526316	0.076205	0.0874585	0.0720983	0.0177729
P08238	Heat shock protein HSP 90-beta	HSP90AB1	0	13.2597	8	182	1	83.2	5.03	4	7	2	0.0698324	0.1221	0.0345841	0.0755056	0.044033	6	12	6	0.171527	0.34227	0.176939	0.230245	0.0970543	7	6	15	0.275482	0.224888	0.605571	0.368647	0.206736	13	13	7	0.436095	0.406631	0.224	0.355575	0.114896	4	2	4	0.0701754	0.0381025	0.0699668	0.0594149	0.0184574
Q562L9	Actin-like protein (Fragment)	ACT	0	53.3981	3	513	1	11.5	6.52	23	27	28	0.401536	0.470958	0.484178	0.452224	0.0443916	44	42	41	1.25786	1.19795	1.20908	1.22163	0.0318675	21	23	16	0.826446	0.862069	0.645943	0.778153	0.115874	14	33	30	0.469641	1.03222	0.96	0.82062	0.306094	28	26	25	0.491228	0.495332	0.437292	0.474618	0.0323897
V9GZ17	Tubulin alpha-8 chain (Fragment)	TUBA8	0	25.8182	6	207	1	31.1	8.29	13	11	8	0.226955	0.191872	0.138337	0.185721	0.0446284	14	14	10	0.400229	0.399315	0.294898	0.364814	0.0605507	9	13	6	0.354191	0.487256	0.242229	0.361225	0.122665	12	16	14	0.402549	0.500469	0.448	0.45034	0.0490018	7	8	10	0.122807	0.15241	0.174917	0.150045	0.0261353
J3KTA4	Probable ATP-dependent RNA helicase DDX5	DDX5	0	26.7101	15	187	1	69	8.85	16	13	11	0.27933	0.226757	0.190213	0.2321	0.044798	7	7	13	0.200114	0.199658	0.383368	0.261047	0.105933	7	7	7	0.275482	0.262369	0.2826	0.273484	0.0102625	6	11	7	0.201275	0.344073	0.224	0.256449	0.0767301	7	6	6	0.122807	0.114307	0.10495	0.114022	0.00893187
P15924	Desmoplakin	DSP	0	5.64263	13	83	1	331.6	6.81	8	7	12	0.139665	0.1221	0.207505	0.156423	0.0451012									3	2	2	0.118064	0.0749625	0.0807428	0.0912564	0.0233951	3	1	2	0.100637	0.0312793	0.064	0.0653056	0.0346974	7	8	5	0.122807	0.15241	0.0874585	0.120892	0.0325181
P67809	Nuclease-sensitive element-binding protein 1	YBX1	0	38.2716	10	179	1	35.9	9.88	7	6	11	0.122207	0.104657	0.190213	0.139026	0.0451895	5	9	8	0.142939	0.256703	0.235919	0.211853	0.0605798	6	5	5	0.236128	0.187406	0.201857	0.208464	0.0250235	3	4	4	0.100637	0.125117	0.128	0.117918	0.0150349	8	5	10	0.140351	0.0952562	0.174917	0.136841	0.0399461
P23284	Peptidyl-prolyl cis-trans isomerase B	PPIB	0	26.3889	5	72	1	23.7	9.41	6	1	2	0.104749	0.0174429	0.0345841	0.0522585	0.0462586																									2	1	1	0.0350877	0.0190512	0.0174917	0.0238769	0.00974013
Q16630	Cleavage and polyadenylation specificity factor subunit 6	CPSF6	0	16.3339	7	198	1	59.2	7.15	13	9	8	0.226955	0.156986	0.138337	0.174093	0.0467205	4	4	5	0.114351	0.11409	0.147449	0.125297	0.0191849	3	3	5	0.118064	0.112444	0.201857	0.144122	0.0500793	2	4	4	0.0670916	0.125117	0.128	0.106736	0.0343636	9	15	10	0.157895	0.285769	0.174917	0.206193	0.0694378
B4DI54	cDNA FLJ56386, highly similar to Heat shock 70 kDa protein 1L		0	24.3972	12	655	1	77.5	8.06	27	27	32	0.471369	0.470958	0.553346	0.498557	0.0474487	19	16	19	0.543168	0.456361	0.560307	0.519945	0.0557285	22	31	24	0.865801	1.16192	0.968914	0.998878	0.150316	25	25	28	0.838645	0.781983	0.896	0.838876	0.0570088	26	27	28	0.45614	0.514384	0.489767	0.486764	0.0292376
P04259	Keratin, type II cytoskeletal 6B	KRT6B	0	40.7801	21	488	1	60	8	26	22	21	0.453911	0.383743	0.363133	0.400262	0.0475898	7	8	5	0.200114	0.22818	0.147449	0.191915	0.0409854	23	25	16	0.905155	0.937031	0.645943	0.829377	0.159656	6	3	6	0.201275	0.093838	0.192	0.162371	0.0595322	27	24	18	0.473684	0.45723	0.31485	0.415255	0.0873411
P62269	40S ribosomal protein S18	RPS18	0	44.0789	9	640	1	17.7	10.99	28	33	33	0.488827	0.575615	0.570638	0.545027	0.048734	15	12	15	0.428816	0.34227	0.442347	0.404478	0.0542966	12	16	13	0.472255	0.5997	0.524828	0.532261	0.0640469	13	12	16	0.436095	0.375352	0.512	0.441149	0.0684641	26	28	29	0.45614	0.533435	0.507259	0.498945	0.0393123
P62263	40S ribosomal protein S14	RPS14	0	31.1258	5	308	1	16.3	10.05	6	6	11	0.104749	0.104657	0.190213	0.133206	0.0493691	15	16	16	0.428816	0.456361	0.471837	0.452338	0.0217906	15	18	19	0.590319	0.674663	0.767057	0.677346	0.0883996	16	17	16	0.536733	0.531749	0.512	0.526827	0.0130802	7	5	4	0.122807	0.0952562	0.0699668	0.09601	0.0264282
Q2NL82	Pre-rRNA-processing protein TSR1 homolog	TSR1	0	13.6816	9	103	1	91.8	7.42	9	4	9	0.157123	0.0697715	0.155629	0.127508	0.0500066	5	5	1	0.142939	0.142613	0.0294898	0.105014	0.0654059	3	2	3	0.118064	0.0749625	0.121114	0.104714	0.0258102	3	1	1	0.100637	0.0312793	0.032	0.0546389	0.0398375	5	4	5	0.0877193	0.076205	0.0874585	0.0837942	0.00657378
A0A024RBE7	Thymopoietin, isoform CRA_c	TMPO	0	19.6035	6	40	1	50.6	9.38	4	9	4	0.0698324	0.156986	0.0691683	0.0986622	0.0505109																									2	3	2	0.0350877	0.0571537	0.0349834	0.0424083	0.0127701
Q16643	Drebrin	DBN1	0	36.8259	19	277	1	71.4	4.45	20	18	24	0.349162	0.313972	0.41501	0.359381	0.0512882	9	11	8	0.25729	0.313748	0.235919	0.268985	0.0402112									6	4	5	0.201275	0.125117	0.16	0.162131	0.0381234	37	32	33	0.649123	0.60964	0.577226	0.611996	0.0360064
P21333	Filamin-A	FLNA	0	26.445	50	651	1	280.6	6.06	39	45	42	0.680866	0.784929	0.726267	0.730687	0.0521724	55	52	43	1.57233	1.48317	1.26806	1.44119	0.156417	3	6	6	0.118064	0.224888	0.242229	0.19506	0.067242	14	22	15	0.469641	0.688145	0.48	0.545929	0.123272	49	47	46	0.859649	0.895409	0.804618	0.853225	0.045735
P08779	Keratin, type I cytoskeletal 16	KRT16	0	35.518	17	728	1	51.2	5.05	25	31	29	0.436453	0.540729	0.50147	0.492884	0.0526659	21	23	20	0.600343	0.656018	0.589797	0.615386	0.0355815	31	31	33	1.21999	1.16192	1.33226	1.23806	0.0865937	18	16	19	0.603824	0.500469	0.608	0.570764	0.0609133	24	23	28	0.421053	0.438179	0.489767	0.449666	0.0357687
A0A0G2JIW1	Heat shock 70 kDa protein 1B	HSPA1B	0	47.352	23	1101	1	70.1	5.66	45	40	46	0.785615	0.697715	0.795435	0.759588	0.0538082	30	29	37	0.857633	0.827153	1.09112	0.925303	0.144411	41	53	41	1.61354	1.98651	1.65523	1.75176	0.204365	39	48	50	1.30829	1.50141	1.6	1.4699	0.148388	45	45	42	0.789474	0.857306	0.734651	0.79381	0.0614424
Q13283	Ras GTPase-activating protein-binding protein 1	G3BP1	0	13.3047	4	73	1	52.1	5.52	7	6	12	0.122207	0.104657	0.207505	0.14479	0.0550172	1	1	1	0.0285878	0.0285225	0.0294898	0.0288667	0.000540621																	4	6	7	0.0701754	0.114307	0.122442	0.102308	0.0281235
P19338	Nucleolin	NCL	0	30.9859	20	252	1	76.6	4.7	17	23	18	0.296788	0.401186	0.311257	0.33641	0.0565621	7	9	5	0.200114	0.256703	0.147449	0.201422	0.0546386	4	6	4	0.157418	0.224888	0.161486	0.181264	0.0378339	5	10	6	0.167729	0.312793	0.192	0.224174	0.0777	15	14	13	0.263158	0.266717	0.227392	0.252422	0.02175
P05787	Keratin, type II cytoskeletal 8	KRT8	0	40.7867	19	163	1	53.7	5.59	9	9	15	0.157123	0.156986	0.259381	0.191163	0.0590783	9	5	2	0.25729	0.142613	0.0589797	0.152961	0.0995593	3	2	3	0.118064	0.0749625	0.121114	0.104714	0.0258102	4	3	1	0.134183	0.093838	0.032	0.0866737	0.0514669	6	7	11	0.105263	0.133359	0.192409	0.143677	0.0444795
Q562V5	Actin-like protein (Fragment)	ACT	0	46.6019	2	469	1	11.4	6.35	17	23	23	0.296788	0.401186	0.397717	0.36523	0.0592985	43	41	39	1.22927	1.16942	1.1501	1.18293	0.0412781	20	23	16	0.787092	0.862069	0.645943	0.765034	0.109738	14	31	29	0.469641	0.969659	0.928	0.7891	0.277443	28	18	25	0.491228	0.342922	0.437292	0.423814	0.0750658
P02533	Keratin, type I cytoskeletal 14	KRT14	0	53.6017	22	875	1	51.5	5.16	37	44	41	0.64595	0.767486	0.708975	0.70747	0.0607823	23	25	24	0.657519	0.713063	0.707756	0.692779	0.0306517	34	36	38	1.33806	1.34933	1.53411	1.40717	0.110085	21	16	20	0.704462	0.500469	0.64	0.614977	0.104273	41	37	40	0.719298	0.704896	0.699668	0.707954	0.0101663
Q04695	Keratin, type I cytoskeletal 17	KRT17	0	36.5741	16	294	1	48.1	5.02	14	20	14	0.244413	0.348857	0.242089	0.278453	0.0609829	8	11	7	0.228702	0.313748	0.206429	0.249626	0.0566367	19	18	24	0.747737	0.674663	0.968914	0.797105	0.153212	7	4	6	0.234821	0.125117	0.192	0.183979	0.0552897	10	12	12	0.175439	0.228615	0.2099	0.204651	0.026974
Q9BUF5	Tubulin beta-6 chain	TUBB6	0	28.2511	11	370	1	49.8	4.88	20	24	17	0.349162	0.418629	0.293965	0.353919	0.0624679	18	18	17	0.51458	0.513406	0.501327	0.509771	0.00733604	13	11	13	0.51161	0.412294	0.524828	0.482911	0.061512	18	19	21	0.603824	0.594307	0.672	0.623377	0.0423767	20	16	13	0.350877	0.30482	0.227392	0.294363	0.0624032
Q0IIN1	Keratin 77	KRT77	0	10.7266	6	482	1	61.8	5.85	20	21	27	0.349162	0.3663	0.466886	0.394116	0.0636003	13	11	13	0.371641	0.313748	0.383368	0.356252	0.0372739	15	16	15	0.590319	0.5997	0.605571	0.59853	0.00769327	10	12	11	0.335458	0.375352	0.352	0.35427	0.0200436	19	15	17	0.333333	0.285769	0.297359	0.305487	0.0248022
Q71U36	Tubulin alpha-1A chain	TUBA1A	0	50.5543	17	992	1	50.1	5.06	44	40	37	0.768156	0.697715	0.639806	0.701893	0.0642769	45	49	44	1.28645	1.3976	1.29755	1.3272	0.0612223	40	42	36	1.57418	1.57421	1.45337	1.53392	0.0697596	48	53	53	1.6102	1.6578	1.696	1.65467	0.042987	40	38	43	0.701754	0.723947	0.752143	0.725948	0.0252537
Q562Z4	Actin-like protein (Fragment)	ACT	0	54.3689	4	445	1	11.5	7.58	16	23	22	0.27933	0.401186	0.380425	0.353647	0.0651925	41	41	40	1.1721	1.16942	1.17959	1.17371	0.00527156	20	23	16	0.787092	0.862069	0.645943	0.765034	0.109738	15	31	29	0.503187	0.969659	0.928	0.800282	0.258134	23	17	21	0.403509	0.323871	0.367326	0.364902	0.0398741
A0A0S2Z428	HCG2039812, isoform CRA_b (Fragment)	KRT6A	0	46.2766	24	572	1	60	8	27	26	20	0.471369	0.453515	0.345841	0.423575	0.0679086	13	11	11	0.371641	0.313748	0.324388	0.336592	0.0308157	31	40	25	1.21999	1.49925	1.00929	1.24284	0.24578	13	8	8	0.436095	0.250235	0.256	0.31411	0.105682	23	23	22	0.403509	0.438179	0.384817	0.408835	0.0270765
Q9BVA1	Tubulin beta-2B chain	TUBB2B	0	49.4382	17	936	1	49.9	4.89	49	48	42	0.855447	0.837258	0.726267	0.806324	0.0699255	46	46	48	1.31504	1.31204	1.41551	1.34753	0.0588943	39	32	34	1.53483	1.1994	1.37263	1.36895	0.167744	49	53	50	1.64374	1.6578	1.6	1.63385	0.0301456	42	35	40	0.736842	0.666794	0.699668	0.701101	0.0350462
B2R6X5	cDNA, FLJ93166, highly similar to Homo sapiens heat shock 70kDa protein 6 (HSP70B') (HSPA6), mRNA		0	15.5521	8	456	1	70.9	6.24	24	16	21	0.418994	0.279086	0.363133	0.353738	0.0704258	15	10	15	0.428816	0.285225	0.442347	0.385463	0.0870717	16	24	19	0.629673	0.89955	0.767057	0.765427	0.134946	19	17	24	0.63737	0.531749	0.768	0.645706	0.118346	18	20	16	0.315789	0.381025	0.279867	0.32556	0.0512819
A0A024RBS2	60S acidic ribosomal protein P0	RPLP0	0	47.6341	11	171	1	34.3	5.97	18	13	10	0.314246	0.226757	0.172921	0.237975	0.0713272	2	2	4	0.0571755	0.0570451	0.117959	0.0773933	0.0351313	4	3	1	0.157418	0.112444	0.0403714	0.103411	0.0590439	3	2	3	0.100637	0.0625586	0.096	0.0863987	0.0207759	11	14	13	0.192982	0.266717	0.227392	0.229031	0.0368948
B4DWU6	cDNA FLJ51361, highly similar to Keratin, type II cytoskeletal 6A		0	44.8077	21	521	1	55.8	6.48	27	24	19	0.471369	0.418629	0.328549	0.406182	0.0722187	12	11	11	0.343053	0.313748	0.324388	0.327063	0.0148347	31	36	24	1.21999	1.34933	0.968914	1.17941	0.193425	13	8	8	0.436095	0.250235	0.256	0.31411	0.105682	22	22	20	0.385965	0.419127	0.349834	0.384975	0.0346574
B4DW52	cDNA FLJ55253, highly similar to Actin, cytoplasmic 1		0	73.7752	22	5776	1	38.6	5.35	371	380	381	6.47696	6.62829	6.58828	6.56451	0.0784182	250	263	257	7.14694	7.50143	7.57889	7.40908	0.230302	120	127	111	4.72255	4.76012	4.48123	4.65463	0.151344	148	204	208	4.96478	6.38098	6.656	6.00059	0.907516	468	412	470	8.21053	7.84911	8.22109	8.09358	0.211778
Q9BYX7	Putative beta-actin-like protein 3	POTEKP	0	23.4667	7	1596	1	42	6.33	112	103	109	1.95531	1.79662	1.88483	1.87892	0.0795108	68	75	68	1.94397	2.13919	2.00531	2.02949	0.099832	30	38	34	1.18064	1.42429	1.37263	1.32585	0.128384	46	55	54	1.54311	1.72036	1.728	1.66382	0.104613	129	114	129	2.26316	2.17184	2.25643	2.23048	0.0508898
V9HWB4	Epididymis secretory sperm binding protein Li 89n	HEL-S-89n	0	48.4709	26	820	1	72.3	5.16	57	48	55	0.995112	0.837258	0.951063	0.927811	0.0814552	17	11	15	0.485992	0.313748	0.442347	0.414029	0.0895458	12	15	17	0.472255	0.562219	0.686314	0.573596	0.107482	16	17	16	0.536733	0.531749	0.512	0.526827	0.0130802	54	48	54	0.947368	0.91446	0.944551	0.93546	0.018241
V9HW22	Epididymis luminal protein 33	HEL-S-72p	0	33.1269	17	505	1	70.9	5.52	28	19	27	0.488827	0.331415	0.466886	0.429042	0.0852569	17	17	18	0.485992	0.484883	0.530817	0.500564	0.0262056	22	24	22	0.865801	0.89955	0.888171	0.884507	0.0171704	27	23	27	0.905736	0.719424	0.864	0.82972	0.0977719	22	24	24	0.385965	0.45723	0.419801	0.420998	0.0356476
A0A024R1N4	X-ray repair complementing defective repair in Chinese hamster cells 6 (Ku autoantigen, 70kDa), isoform CRA_a	XRCC6	0	30.2135	16	227	1	69.8	6.64	22	13	22	0.384078	0.226757	0.380425	0.33042	0.0897933	3	2	2	0.0857633	0.0570451	0.0589797	0.0672627	0.0160512	2	5	2	0.0787092	0.187406	0.0807428	0.115619	0.0621776	2	2	3	0.0670916	0.0625586	0.096	0.0752167	0.018141	10	10	10	0.175439	0.190512	0.174917	0.180289	0.00885735
P0CG38	POTE ankyrin domain family member I	POTEI	0	9.5814	8	905	1	121.2	6.21	52	48	42	0.907821	0.837258	0.726267	0.823782	0.0915244	54	58	46	1.54374	1.65431	1.35653	1.51819	0.150522	23	25	25	0.905155	0.937031	1.00929	0.950491	0.0533538	31	41	37	1.03992	1.28245	1.184	1.16879	0.12198	60	45	59	1.05263	0.857306	1.03201	0.980649	0.107315
B1PS43	Myosin heavy chain 11 smooth muscle isoform	MYH11	0	10.5964	25	1109	1	234.1	5.8	90	97	102	1.57123	1.69196	1.76379	1.67566	0.0973099	22	27	24	0.628931	0.770108	0.707756	0.702265	0.0707488	21	14	15	0.826446	0.524738	0.605571	0.652252	0.156177	32	34	29	1.07347	1.0635	0.928	1.02165	0.0812598	73	73	72	1.2807	1.39074	1.2594	1.31028	0.0704892
P35908	Keratin, type II cytoskeletal 2 epidermal	KRT2	0	59.3114	33	1444	1	65.4	8	56	57	67	0.977654	0.994244	1.15857	1.04349	0.100007	37	32	30	1.05775	0.912721	0.884695	0.951721	0.0928846	51	57	56	2.00708	2.13643	2.2608	2.13477	0.126866	30	29	32	1.00637	0.9071	1.024	0.979158	0.063023	50	50	50	0.877193	0.952562	0.874585	0.901447	0.0442867
P07437	Tubulin beta chain	TUBB	0	58.7838	19	1331	1	49.6	4.89	67	60	56	1.16969	1.04657	0.968356	1.06154	0.1015	64	66	66	1.82962	1.88249	1.94633	1.88614	0.0584417	50	46	49	1.96773	1.72414	1.9782	1.89002	0.143755	66	73	67	2.21402	2.28339	2.144	2.2138	0.0696956	49	49	52	0.859649	0.933511	0.909568	0.900909	0.0376846
P13647	Keratin, type II cytoskeletal 5	KRT5	0	43.3898	28	494	1	62.3	7.74	33	25	21	0.576117	0.436072	0.363133	0.458441	0.10824	13	14	13	0.371641	0.399315	0.383368	0.384775	0.0138908	29	29	23	1.14128	1.08696	0.928543	1.05226	0.110533	15	10	10	0.503187	0.312793	0.32	0.37866	0.107904	23	21	23	0.403509	0.400076	0.402309	0.401965	0.00174199
P13645	Keratin, type I cytoskeletal 10	KRT10	0	59.0753	32	2151	1	58.8	5.21	106	112	120	1.85056	1.9536	2.07505	1.95974	0.11237	58	69	66	1.65809	1.96805	1.94633	1.85749	0.173028	80	82	85	3.14837	3.07346	3.43157	3.2178	0.188881	56	60	68	1.87856	1.87676	2.176	1.97711	0.172248	86	84	95	1.50877	1.6003	1.66171	1.59026	0.0769623
J3QRS3	Myosin regulatory light chain 12A	MYL12A	0	50.8475	9	914	1	20.4	4.75	82	69	77	1.43156	1.20356	1.33149	1.3222	0.114286	18	19	15	0.51458	0.541928	0.442347	0.499618	0.0514486	12	13	11	0.472255	0.487256	0.444086	0.467866	0.0219176	21	23	21	0.704462	0.719424	0.672	0.698629	0.0242443	70	75	82	1.22807	1.42884	1.43432	1.36374	0.117529
Q13707	ACTA2 protein (Fragment)	ACTA2	0	39.697	12	3615	1	36.8	5.35	244	255	245	4.25978	4.44793	4.23656	4.31475	0.115918	155	131	134	4.4311	3.73645	3.95164	4.03973	0.355606	74	71	67	2.91224	2.66117	2.70488	2.75943	0.134129	100	116	120	3.35458	3.6284	3.84	3.60766	0.243374	318	252	301	5.57895	4.80091	5.265	5.21495	0.391423
Q562M5	Actin-like protein (Fragment)	ACT	0	57.2816	3	439	1	11.6	6.35	42	29	33	0.73324	0.505843	0.570638	0.603241	0.117152	19	15	20	0.543168	0.427838	0.589797	0.520267	0.0833724	6	6	9	0.236128	0.224888	0.363343	0.274786	0.0768981	12	15	17	0.402549	0.46919	0.544	0.471913	0.0707646	34	41	37	0.596491	0.781101	0.647193	0.674928	0.095379
F5H5D3	Tubulin alpha chain	TUBA1C	0	39.8844	16	1019	1	57.7	5.07	50	45	37	0.872905	0.784929	0.639806	0.76588	0.117711	44	47	43	1.25786	1.34056	1.26806	1.28883	0.04509	39	41	36	1.53483	1.53673	1.45337	1.50831	0.0475885	45	50	52	1.50956	1.56397	1.664	1.57918	0.078335	43	40	47	0.754386	0.76205	0.822109	0.779515	0.0370863
P68133	Actin, alpha skeletal muscle	ACTA1	0	56.2334	20	4332	1	42	5.39	301	313	303	5.25489	5.45962	5.2395	5.318	0.122887	179	155	153	5.11721	4.42099	4.51194	4.68338	0.378448	87	83	76	3.42385	3.11094	3.06823	3.20101	0.194165	115	132	134	3.85777	4.12887	4.288	4.09155	0.217532	392	317	382	6.87719	6.03925	6.68183	6.53275	0.438413
P35580	Myosin-10	MYH10	0	59.3623	135	4115	1	228.9	5.54	361	349	352	6.30237	6.08756	6.08681	6.15891	0.12424	114	109	104	3.25901	3.10896	3.06694	3.14497	0.100969	86	78	84	3.38449	2.92354	3.3912	3.23308	0.26809	122	124	120	4.09259	3.87864	3.84	3.93707	0.136056	272	267	279	4.77193	5.08668	4.88018	4.91293	0.159912
P68366	Tubulin alpha-4A chain	TUBA4A	0	38.6161	13	465	1	49.9	5.06	35	29	21	0.611034	0.505843	0.363133	0.493337	0.124422	27	28	18	0.77187	0.798631	0.530817	0.700439	0.147505	17	20	15	0.669028	0.749625	0.605571	0.674741	0.0721967	29	32	26	0.972828	1.00094	0.832	0.935255	0.0905197	17	18	29	0.298246	0.342922	0.507259	0.382809	0.110068
P68032	Actin, alpha cardiac muscle 1	ACTC1	0	56.2334	20	4361	1	42	5.39	302	316	307	5.27235	5.51195	5.30866	5.36432	0.129134	184	159	155	5.26015	4.53508	4.57092	4.78872	0.408664	84	83	77	3.30579	3.11094	3.1086	3.17511	0.113174	120	132	135	4.02549	4.12887	4.32	4.15812	0.149416	392	322	379	6.87719	6.1345	6.62935	6.54702	0.37813
H6VRG1	Keratin 1	KRT1	0	64.4961	42	4279	1	66.1	8.12	171	170	185	2.98534	2.96529	3.19903	3.04989	0.129553	98	96	107	2.8016	2.73816	3.15541	2.89839	0.224834	145	149	149	5.70641	5.58471	6.01534	5.76882	0.221996	98	101	111	3.28749	3.15921	3.552	3.3329	0.200293	188	164	177	3.29825	3.1244	3.09603	3.17289	0.109482
P35579	Myosin-9	MYH9	0	63.6735	147	5018	1	226.4	5.6	441	451	439	7.69902	7.86674	7.59122	7.71899	0.138842	71	78	73	2.02973	2.22476	2.15276	2.13575	0.0986194	59	52	57	2.32192	1.94903	2.30117	2.19071	0.209558	117	133	120	3.92486	4.16015	3.84	3.975	0.165861	414	388	402	7.26316	7.39188	7.03166	7.2289	0.182539
E7EVS6	Actin, cytoplasmic 1 (Fragment)	ACTB	0	54.6012	8	2015	1	17.9	5.5	120	136	128	2.09497	2.37223	2.21338	2.22686	0.13912	111	104	100	3.17324	2.96634	2.94898	3.02952	0.124767	58	59	48	2.28257	2.21139	1.93783	2.14393	0.182002	63	80	77	2.11338	2.50235	2.464	2.35991	0.214356	167	125	161	2.92982	2.38141	2.81616	2.70913	0.289452
Q7Z406	Myosin-14	MYH14	0	25.0125	44	730	1	227.7	5.6	60	67	78	1.04749	1.16867	1.34878	1.18831	0.151605	8	12	7	0.228702	0.34227	0.206429	0.259134	0.0728546	10	6	6	0.393546	0.224888	0.242229	0.286887	0.0927751	14	18	15	0.469641	0.563028	0.48	0.504223	0.0511892	57	57	55	1	1.08592	0.962043	1.01599	0.0634678
Q562R1	Beta-actin-like protein 2	ACTBL2	0	36.9681	13	2869	1	42	5.59	203	211	223	3.54399	3.68045	3.85613	3.69352	0.156478	111	108	104	3.17324	3.08043	3.06694	3.10687	0.0578721	53	56	48	2.08579	2.09895	1.93783	2.04086	0.0894681	80	86	84	2.68366	2.69002	2.688	2.68723	0.00324882	261	231	269	4.57895	4.40084	4.70526	4.56168	0.152946
P13639	Elongation factor 2	EEF2	0	9.09091	7	36	1	95.3	6.83									2	1	2	0.0571755	0.0285225	0.0589797	0.0482259	0.0170874	3	2	2	0.118064	0.0749625	0.0807428	0.0912564	0.0233951	1	2	2	0.0335458	0.0625586	0.064	0.0533681	0.0171818
A0A024R0M6	Translocase of inner mitochondrial membrane 50 homolog (Yeast), isoform CRA_b	TIMM50	0	5.26316	2	17	1	50.4	9.42									2	1	1	0.0571755	0.0285225	0.0294898	0.038396	0.0162708	1	1	2	0.0393546	0.0374813	0.0807428	0.0525262	0.0244542	1	2	1	0.0335458	0.0625586	0.032	0.0427015	0.0172142
Q00325	Phosphate carrier protein, mitochondrial	SLC25A3	0.001	3.31492	1	16	1	40.1	9.38									1	2	2	0.0285878	0.0570451	0.0589797	0.0482042	0.0170158									1	1	1	0.0335458	0.0312793	0.032	0.032275	0.00115799
B3KUJ0	cDNA FLJ39996 fis, clone STOMA2002166, highly similar to Splicing factor 3B subunit 4		0	3.30189	1	19	1	44.5	8.24									1	2	2	0.0285878	0.0570451	0.0589797	0.0482042	0.0170158									1	2	2	0.0335458	0.0625586	0.064	0.0533681	0.0171818
Q14240	Eukaryotic initiation factor 4A-II	EIF4A2	0	6.63391	2	6	1	46.4	5.48																									1	1	1	0.0335458	0.0312793	0.032	0.032275	0.00115799
Q9HCM4	Band 4.1-like protein 5	EPB41L5	0	3.95634	2	11	1	81.8	6.58																									1	1	1	0.0335458	0.0312793	0.032	0.032275	0.00115799
P00338	L-lactate dehydrogenase A chain	LDHA	0	6.62651	2	33	1	36.7	8.27																	1	2	1	0.0393546	0.0749625	0.0403714	0.0515628	0.0202711	2	1	1	0.0670916	0.0312793	0.032	0.043457	0.0204713
P12004	Proliferating cell nuclear antigen	PCNA	0	12.2605	2	21	1	28.8	4.69									2	1	2	0.0571755	0.0285225	0.0589797	0.0482259	0.0170874	1	3	1	0.0393546	0.112444	0.0403714	0.0640566	0.0419076	2	2	2	0.0670916	0.0625586	0.064	0.0645501	0.00231599
P63104	14-3-3 protein zeta/delta	YWHAZ	0	20	4	26	1	27.7	4.79																	2	1	3	0.0787092	0.0374813	0.121114	0.0791016	0.0418179	2	1	1	0.0670916	0.0312793	0.032	0.043457	0.0204713	2	3	2	0.0350877	0.0571537	0.0349834	0.0424083	0.0127701
P62316	Small nuclear ribonucleoprotein Sm D2	SNRPD2	0	23.7288	2	13	1	13.5	9.91																									2	2	1	0.0670916	0.0625586	0.032	0.0538834	0.0190866
Q6UN15	Pre-mRNA 3'-end-processing factor FIP1	FIP1L1	0	7.74411	3	40	1	66.5	5.59									2	2	2	0.0571755	0.0570451	0.0589797	0.0577334	0.00108124	1	2	2	0.0393546	0.0749625	0.0807428	0.06502	0.022414	3	3	2	0.100637	0.093838	0.064	0.0861584	0.0194886	1	1	3	0.0175439	0.0190512	0.0524751	0.0296901	0.0197468
P55060	Exportin-2	CSE1L	0	2.78064	2	14	1	110.3	5.77									1	1	1	0.0285878	0.0285225	0.0294898	0.0288667	0.000540621	1	2	2	0.0393546	0.0749625	0.0807428	0.06502	0.022414	3	1	1	0.100637	0.0312793	0.032	0.0546389	0.0398375
G9K388	YWHAE/FAM22A fusion protein (Fragment)	YWHAE/FAM22A fusion	0	12.5	4	19	1	41.2	4.97																	2	1	3	0.0787092	0.0374813	0.121114	0.0791016	0.0418179	3	2	2	0.100637	0.0625586	0.064	0.075732	0.0215807	1	1	1	0.0175439	0.0190512	0.0174917	0.0180289	0.000885735
Q8WWI1	LIM domain only protein 7	LMO7	0	5.05051	6	27	1	192.6	8.09									3	6	2	0.0857633	0.171135	0.0589797	0.105293	0.0585727	1	3	3	0.0393546	0.112444	0.121114	0.0909709	0.0449107	3	1	2	0.100637	0.0312793	0.064	0.0653056	0.0346974
H9ZYJ2	Thioredoxin	TXN	0	20.9524	2	27	1	11.7	4.92																	2	3	3	0.0787092	0.112444	0.121114	0.104089	0.0224031	3	1	1	0.100637	0.0312793	0.032	0.0546389	0.0398375
P60866	40S ribosomal protein S20	RPS20	0	22.6891	3	31	1	13.4	9.94									2	4	4	0.0571755	0.11409	0.117959	0.0964083	0.0340316	2	2	3	0.0787092	0.0749625	0.121114	0.0915953	0.0256327	3	3	3	0.100637	0.093838	0.096	0.0968251	0.00347398
Q14257	Reticulocalbin-2	RCN2	0	20.8202	4	23	1	36.9	4.4									2	4	2	0.0571755	0.11409	0.0589797	0.0767484	0.0323514									3	2	1	0.100637	0.0625586	0.032	0.0650653	0.0343873
Q15459	Splicing factor 3A subunit 1	SF3A1	0	5.42245	4	18	1	88.8	5.22									2	1	2	0.0571755	0.0285225	0.0589797	0.0482259	0.0170874									3	3	1	0.100637	0.093838	0.032	0.0754918	0.0378181
P19474	E3 ubiquitin-protein ligase TRIM21	TRIM21	0	12.8421	4	34	1	54.1	6.38									5	4	2	0.142939	0.11409	0.0589797	0.105336	0.0426586	2	2	1	0.0787092	0.0749625	0.0403714	0.064681	0.0211359	4	5	4	0.134183	0.156397	0.128	0.139527	0.0149334
H7BY58	Protein-L-isoaspartate O-methyltransferase	PCMT1	0	18.5315	4	32	1	30.3	6.73									1	6	3	0.0285878	0.171135	0.0884695	0.0960641	0.0715765	4	2	1	0.157418	0.0749625	0.0403714	0.0909174	0.0601325	4	5	3	0.134183	0.156397	0.096	0.12886	0.0305482
Q05682	Caldesmon	CALD1	0	12.1059	8	60	1	93.2	5.66									7	7	3	0.200114	0.199658	0.0884695	0.162747	0.0643268									4	3	2	0.134183	0.093838	0.064	0.0973404	0.0352224	2	5	4	0.0350877	0.0952562	0.0699668	0.0667702	0.0302114
O43795	Unconventional myosin-Ib	MYO1B	0	5.45775	4	15	1	131.9	9.38									1	2	1	0.0285878	0.0570451	0.0294898	0.0383742	0.0161757									4	1	1	0.134183	0.0312793	0.032	0.0658208	0.0592046
E7EMB3	Calmodulin	CALM2	0	28.0612	3	38	1	21.7	4.56									2	3	4	0.0571755	0.0855676	0.117959	0.0869008	0.0304138	1	4	1	0.0393546	0.149925	0.0403714	0.0765503	0.0635464	5	6	7	0.167729	0.187676	0.224	0.193135	0.02853
Q96I25	Splicing factor 45	RBM17	0	19.202	6	46	1	44.9	5.97									4	7	5	0.114351	0.199658	0.147449	0.153819	0.0430086	5	5	6	0.196773	0.187406	0.242229	0.208803	0.0293241	6	3	5	0.201275	0.093838	0.16	0.151704	0.0541967
Q96IZ0	PRKC apoptosis WT1 regulator protein	PAWR	0	30.8824	6	71	1	36.5	5.41									8	9	9	0.228702	0.256703	0.265408	0.250271	0.0191798	4	8	5	0.157418	0.29985	0.201857	0.219708	0.0728746	7	10	6	0.234821	0.312793	0.192	0.246538	0.0612432
P07900	Heat shock protein HSP 90-alpha	HSP90AA1	0	13.1148	8	144	1	84.6	5.02									4	10	6	0.114351	0.285225	0.176939	0.192172	0.0864496	5	6	12	0.196773	0.224888	0.484457	0.302039	0.158603	10	10	6	0.335458	0.312793	0.192	0.280084	0.0771199	2	1	2	0.0350877	0.0190512	0.0349834	0.0297075	0.00922869
A0A1B0GTL5	Rab11 family-interacting protein 5	RAB11FIP5	0	19.4864	15	74	1	138.3	5.21									9	5	5	0.25729	0.142613	0.147449	0.182451	0.0648579	7	7	7	0.275482	0.262369	0.2826	0.273484	0.0102625	10	9	10	0.335458	0.281514	0.32	0.312324	0.0277791
H0Y2S9	Myosin phosphatase Rho-interacting protein (Fragment)	MPRIP	0	10.3679	14	269	1	203.4	5.22									36	41	37	1.02916	1.16942	1.09112	1.09657	0.0702905	24	28	20	0.94451	1.04948	0.807428	0.933805	0.121378	26	28	23	0.872191	0.875821	0.736	0.828004	0.0796984
B9EGI2	Myosin phosphatase Rho interacting protein	MPRIP	0	34.0405	26	390	1	118	6.39									51	55	54	1.45798	1.56874	1.59245	1.53972	0.0717799	38	42	36	1.49547	1.57421	1.45337	1.50769	0.0613395	35	41	33	1.1741	1.28245	1.056	1.17085	0.113261
Q9P0K7	Ankycorbin	RAI14	0	36.9388	29	377	1	110	6.21									58	52	48	1.65809	1.48317	1.41551	1.51892	0.125179	30	30	38	1.18064	1.12444	1.53411	1.27973	0.222088	41	40	37	1.37538	1.25117	1.184	1.27018	0.0970947
J3KQY1	39S ribosomal protein L22, mitochondrial	MRPL22	0	21.1207	4	17	1	26.5	9.74																																	2	1	1	0.0350877	0.0190512	0.0174917	0.0238769	0.00974013
P04279	Semenogelin-1	SEMG1	0	7.79221	3	9	1	52.1	9.29
Q16629	Serine/arginine-rich splicing factor 7	SRSF7	0.001	5.88235	1	11	1	27.4	11.82
C9IZQ1	Translocon-associated protein subunit alpha	SSR1	0	8.72483	2	15	1	33.9	4.69
A8K401	Prohibitin, isoform CRA_a	PHB	0	15.4412	3	23	1	29.8	5.76
M0QYS1	60S ribosomal protein L13a (Fragment)	RPL13A	0	10.4762	2	16	1	24.2	10.86
Q9P0L0	Vesicle-associated membrane protein-associated protein A	VAPA	0	10.4418	2	15	1	27.9	8.62
J3KPS3	Fructose-bisphosphate aldolase	ALDOA	0	9.23913	3	61	1	39.8	8.09																																	1	2	2	0.0175439	0.0381025	0.0349834	0.0302099	0.0110794
B2RB23	cDNA, FLJ95265, highly similar to Homo sapiens acetyl-Coenzyme A acyltransferase 2 (mitochondrial 3-oxoacyl-Coenzyme A thiolase) (ACAA2), nuclear gene encoding mitochondrial protein, mRNA		0	3.27456	1	19	1	42	8.25
P49006	MARCKS-related protein	MARCKSL1	0	14.359	2	47	1	19.5	4.67
H7C2N1	Prothymosin alpha (Fragment)	PTMA	0	16.2162	3	49	1	15.8	4.23									2	2	2	0.0571755	0.0570451	0.0589797	0.0577334	0.00108124
P29966	Myristoylated alanine-rich C-kinase substrate	MARCKS	0	15.0602	3	54	1	31.5	4.45																	1	1	2	0.0393546	0.0374813	0.0807428	0.0525262	0.0244542
E9KL35	Epididymis tissue sperm binding protein Li 3a		0	11.041	3	19	1	35.1	7.69																	1	2	1	0.0393546	0.0749625	0.0403714	0.0515628	0.0202711									1	1	3	0.0175439	0.0190512	0.0524751	0.0296901	0.0197468
E9PK25	Cofilin-1	CFL1	0	22.0588	3	23	1	22.7	8.34									2	2	1	0.0571755	0.0570451	0.0294898	0.0479035	0.0159468	2	1	1	0.0787092	0.0374813	0.0403714	0.0521873	0.023014									2	4	2	0.0350877	0.076205	0.0349834	0.0487587	0.0237692
Q549N0	Cofilin 2 (Muscle), isoform CRA_a	CFL2	0	18.6747	2	21	1	18.7	7.88									2	2	1	0.0571755	0.0570451	0.0294898	0.0479035	0.0159468	2	1	1	0.0787092	0.0374813	0.0403714	0.0521873	0.023014									2	4	1	0.0350877	0.076205	0.0174917	0.0429281	0.0301317
A8K6V3	cDNA FLJ78677, highly similar to Homo sapiens splicing factor 3b, subunit 3, 130kDa (SF3B3), mRNA		0.008	1.15037	1	7	1	135.5	5.21																	1	1	1	0.0393546	0.0374813	0.0403714	0.0390691	0.00146608
Q5H9N4	Putative uncharacterized protein DKFZp686L20222	DKFZp686L20222	0	11.5512	3	18	1	34.8	8.95									2	1	1	0.0571755	0.0285225	0.0294898	0.038396	0.0162708	1	1	1	0.0393546	0.0374813	0.0403714	0.0390691	0.00146608
P09661	U2 small nuclear ribonucleoprotein A'	SNRPA1	0	12.1569	2	15	1	28.4	8.62									1	1	2	0.0285878	0.0285225	0.0589797	0.0386966	0.0175656	1	1	1	0.0393546	0.0374813	0.0403714	0.0390691	0.00146608
A0A024R1A3	Testicular secretory protein Li 63	UBE1	0	4.91493	3	6	1	117.8	5.76																	1	1	1	0.0393546	0.0374813	0.0403714	0.0390691	0.00146608
P35268	60S ribosomal protein L22	RPL22	0	10.1562	2	20	1	14.8	9.19									1	3	1	0.0285878	0.0855676	0.0294898	0.0478817	0.03264	3	2	1	0.118064	0.0749625	0.0403714	0.0777992	0.0389238
Q5U077	L-lactate dehydrogenase	LDHB	0	14.3713	4	20	1	36.6	6.05																	1	3	2	0.0393546	0.112444	0.0807428	0.0775137	0.0366514
P49458	Signal recognition particle 9 kDa protein	SRP9	0	22.093	2	9	1	10.1	7.97																	1	1	2	0.0393546	0.0374813	0.0807428	0.0525262	0.0244542
B2RDP6	cDNA, FLJ96709, highly similar to Homo sapiens glutamate rich WD repeat protein GRWD (GRWD), mRNA		0	7.17489	2	10	1	49.4	4.92																																	1	1	2	0.0175439	0.0190512	0.0349834	0.0238595	0.00966301
P61513	60S ribosomal protein L37a	RPL37A	0	29.3478	2	13	1	10.3	10.43																																	1	2	2	0.0175439	0.0381025	0.0349834	0.0302099	0.0110794
B2R4V2	cDNA, FLJ92227, highly similar to Homo sapiens ribosomal protein L36a-like (RPL36AL), mRNA		0	16.9811	2	11	1	12.5	10.65																																	1	1	1	0.0175439	0.0190512	0.0174917	0.0180289	0.000885735
B2R761	cDNA, FLJ93299, highly similar to Homo sapiens sterol carrier protein 2 (SCP2), mRNA		0	5.66728	2	6	1	59	7.05																																	1	1	1	0.0175439	0.0190512	0.0174917	0.0180289	0.000885735
A8K651	cDNA FLJ75700, highly similar to Homo sapiens complement component 1, q subcomponent binding protein (C1QBP), nuclear gene encoding mitochondrial protein, mRNA		0	11.7021	2	13	1	31.4	4.84									1	3	2	0.0285878	0.0855676	0.0589797	0.0577117	0.0285111																	1	2	1	0.0175439	0.0381025	0.0174917	0.0243793	0.0118846
Q4VCS5	Angiomotin	AMOT	0	2.58303	2	8	1	118	7.64																																	1	1	1	0.0175439	0.0190512	0.0174917	0.0180289	0.000885735
A8K968	Band 4.1-like protein 3	EPB41L3	0	5.95238	3	9	1	84.7	5.44																																	1	1	1	0.0175439	0.0190512	0.0174917	0.0180289	0.000885735
Q5RKV6	Exosome complex component MTR3	EXOSC6	0	5.88235	1	7	1	28.2	6.28																																	1	1	1	0.0175439	0.0190512	0.0174917	0.0180289	0.000885735
I1E4Y6	GRB10-interacting GYF protein 2	GIGYF2	0.002	0.908403	1	12	1	152.4	5.6																																	1	1	2	0.0175439	0.0190512	0.0349834	0.0238595	0.00966301
A6NEM2	Host cell factor 1	HCFC1	0	1.39423	2	3	1	213.3	7.33																																	1	1	1	0.0175439	0.0190512	0.0174917	0.0180289	0.000885735
Q32MZ4	Leucine-rich repeat flightless-interacting protein 1	LRRFIP1	0	6.80693	4	12	1	89.2	4.65																																	1	1	1	0.0175439	0.0190512	0.0174917	0.0180289	0.000885735
Q9HC36	rRNA methyltransferase 3, mitochondrial	MRM3	0	2.85714	1	5	1	47	8.73																																	1	1	1	0.0175439	0.0190512	0.0174917	0.0180289	0.000885735
Q0ZGT2	Nexilin	NEXN	0.004	1.62963	1	6	1	80.6	5.33																																	1	1	1	0.0175439	0.0190512	0.0174917	0.0180289	0.000885735
A0A0A0MRM9	Nucleolar and coiled-body phosphoprotein 1 (Fragment)	NOLC1	0	7.34463	3	7	1	74.6	9.47																																	1	1	1	0.0175439	0.0190512	0.0174917	0.0180289	0.000885735
P30101	Protein disulfide-isomerase A3	PDIA3	0	7.52475	3	12	1	56.7	6.35																																	1	1	1	0.0175439	0.0190512	0.0174917	0.0180289	0.000885735
J3KQE5	GTP-binding nuclear protein Ran (Fragment)	RAN	0	13.6752	3	23	1	26.8	9.58																																	1	2	2	0.0175439	0.0381025	0.0349834	0.0302099	0.0110794
B5BUD2	Replication factor C 2 isoform 1 (Fragment)	RFC2	0	8.47458	2	6	1	39.2	6.44																																	1	1	1	0.0175439	0.0190512	0.0174917	0.0180289	0.000885735
J3KNL6	Protein transport protein Sec16A	SEC16A	0	1.2728	2	6	1	251.7	5.8																																	1	1	1	0.0175439	0.0190512	0.0174917	0.0180289	0.000885735
P0DME0	Protein SETSIP	SETSIP	0	7.94702	2	12	1	34.9	4.31																																	1	1	1	0.0175439	0.0190512	0.0174917	0.0180289	0.000885735
P62306	Small nuclear ribonucleoprotein F	SNRPF	0	15.1163	1	9	1	9.7	4.67																																	1	1	1	0.0175439	0.0190512	0.0174917	0.0180289	0.000885735
Q8N9Q2	Protein SREK1IP1	SREK1IP1	0	8.3871	1	11	1	18.2	9.85																																	1	1	1	0.0175439	0.0190512	0.0174917	0.0180289	0.000885735
Q96QS1	Tetraspanin-32	TSPAN32	0.003	4.6875	1	7	1	34.6	8.4																																	1	2	3	0.0175439	0.0381025	0.0524751	0.0360405	0.0175567
K7ER00	Phenylalanine--tRNA ligase alpha subunit	FARSA	0	6.75182	3	10	1	62.4	7.84																																	2	2	1	0.0350877	0.0381025	0.0174917	0.0302273	0.0111319
Q9ULV0	Unconventional myosin-Vb	MYO5B	0	3.78788	5	11	1	213.5	7.2																																	2	1	1	0.0350877	0.0190512	0.0174917	0.0238769	0.00974013
A0A0B7NNI9	MHC class I antigen	HLA-C	0	10.1093	3	24	1	40.6	6.04									1	3	1	0.0285878	0.0855676	0.0294898	0.0478817	0.03264																	2	1	1	0.0350877	0.0190512	0.0174917	0.0238769	0.00974013
F8W930	Insulin-like growth factor 2 mRNA-binding protein 2	IGF2BP2	0	6.44628	3	13	1	66.7	8.46																																	2	1	2	0.0350877	0.0190512	0.0349834	0.0297075	0.00922869
A0A0S2Z492	DNA helicase	MCM3	0	3.12125	2	11	1	93.7	6.38																																	2	2	1	0.0350877	0.0381025	0.0174917	0.0302273	0.0111319
Q9Y3U8	60S ribosomal protein L36	RPL36	0	19.0476	2	25	1	12.2	11.59																																	2	1	1	0.0350877	0.0190512	0.0174917	0.0238769	0.00974013
A0A0U1RQC9	Cellular tumor antigen p53	TP53	0	4.87805	2	11	1	45.9	7.2																																	2	2	1	0.0350877	0.0381025	0.0174917	0.0302273	0.0111319
Q13724	Mannosyl-oligosaccharide glucosidase	MOGS	0	3.94265	3	13	1	91.9	8.9																																	3	2	1	0.0526316	0.0381025	0.0174917	0.0360753	0.0176574
A0A024RAI1	ARP3 actin-related protein 3 homolog (Yeast), isoform CRA_a	ACTR3	0	5.02392	2	8	1	47.3	5.88
P12532	Creatine kinase U-type, mitochondrial	CKMT1A	0.002	5.03597	1	3	1	47	8.34
Q9UBS4	DnaJ homolog subfamily B member 11	DNAJB11	0	11.4525	3	12	1	40.5	6.18
P05198	Eukaryotic translation initiation factor 2 subunit 1	EIF2S1	0	8.57143	2	5	1	36.1	5.08
P30419	Glycylpeptide N-tetradecanoyltransferase 1	NMT1	0.005	2.62097	1	4	1	56.8	7.8
A0A024R203	Proteasome (Prosome, macropain) activator subunit 3 (PA28 gamma Ki), isoform CRA_a	PSME3	0	11.3208	2	5	1	30.9	6.71
O43290	U4/U6.U5 tri-snRNP-associated protein 1	SART1	0	4	2	6	1	90.2	6.13
C9J6P4	Zinc finger CCCH-type antiviral protein 1	ZC3HAV1	0	1.46484	1	10	1	114	8.56
Q59H77	T-complex protein 1 subunit gamma (Fragment)		0	7.27903	4	18	1	63.5	6.43
Q53GB0	Mitochondrial import receptor Tom22 variant (Fragment)		0	8.4507	1	7	1	15.5	4.34									1	1	1	0.0285878	0.0285225	0.0294898	0.0288667	0.000540621
B3KY60	cDNA FLJ16777 fis, clone BRHIP2029567, highly similar to Cell division cycle 5-like protein		0	5.23691	3	3	1	92.2	8.18
A8KAP3	cDNA FLJ78483, highly similar to Homo sapiens elongation factor Tu GTP binding domain containing 2 (EFTUD2), mRNA		0	4.83539	3	5	1	109.4	5.01
B4DEQ7	cDNA FLJ50003, highly similar to Homo sapiens leucine-rich repeats and calponin homology (CH) domain containing 3 (LRCH3), mRNA		0	6.35118	4	6	1	89.1	6.7
A8K6U7	cDNA FLJ78252, highly similar to Homo sapiens heterogeneous nuclear ribonucleoprotein U-like 1 (HNRPUL1), transcript variant 1, mRNA		0	2.92056	2	5	1	95.6	6.92
B7Z6M0	Peptidylprolyl isomerase		0	7.25624	2	6	1	47.1	4.94
B2R6E2	cDNA, FLJ92910, highly similar to Homo sapiens programmed cell death 4 (neoplastic transformation inhibitor) (PDCD4), transcript variant 1, mRNA		0	5.97015	2	5	1	51.6	5.25
B7Z2B0	cDNA FLJ53470, highly similar to Calcium/calmodulin-dependent protein kinase type II delta chain (EC 2.7.11.17)		0	2.43902	1	3	1	60	7.27
B2R9Y2	cDNA, FLJ94609		0	4.6595	2	5	1	66.3	8.97
B7Z3K9	Fructose-bisphosphate aldolase		0	5.09978	1	1	1	48.4	8.07
B3KPC7	Actin-related protein 2/3 complex subunit 5		0	8.49673	1	3	1	17	6.02
A0A140VK70	Testis secretory sperm-binding protein Li 197a		0	6.00462	2	4	1	48.6	5.95
E9KL44	Epididymis tissue sperm binding protein Li 14m		0	6.1599	3	8	1	82.9	9.04
Q59F99	Staufen isoform b variant (Fragment)		0	4.90694	2	4	1	64.7	9.42
A8K492	cDNA FLJ76789, highly similar to Homo sapiens methionine-tRNA synthetase (MARS), mRNA		0	2.88889	2	2	1	101.1	6.16
Q59HH7	X-ray repair cross complementing protein 1 variant (Fragment)		0	3.55487	2	2	1	71	6.04
A8K566	cDNA FLJ78246, highly similar to Homo sapiens splicing factor 3a, subunit 3, 60kDa (SF3A3), mRNA		0	2.39521	1	1	1	58.8	5.43
S6B2A1	IgG L chain		0	4.8913	1	2	1	20.4	5.52
B2RDG9	cDNA, FLJ96603, highly similar to Homo sapiens actin-related protein 10 homolog (S. cerevisiae) (ACTR10), mRNA		0.001	4.79616	1	1	1	46.2	7.62
A0A140VKG2	Testis tissue sperm-binding protein Li 79P		0.002	2.62295	1	12	1	70	4.69									1	2	1	0.0285878	0.0570451	0.0294898	0.0383742	0.0161757
A8K4W2	cDNA FLJ78635, highly similar to Homo sapiens ATP synthase, H+ transporting, mitochondrial F0 complex, subunit b, isoform 1 (ATP5F1), transcript variant 1, mRNA		0.002	4.6875	1	11	1	28.9	9.36
B3KMC9	cDNA FLJ10711 fis, clone NT2RP3000917, highly similar to 5'-3' exoribonuclease 2 (EC 3.1.11.-)		0.002	1.26316	1	7	1	108.5	7.47
B2RDD7	Protein arginine N-methyltransferase 5		0.002	2.98273	2	5	1	72.7	6.29
Q59EG8	Proteasome 26S non-ATPase subunit 2 variant (Fragment)		0.002	1.31435	1	5	1	100.5	5.15
B4DJQ5	cDNA FLJ59211, highly similar to Glucosidase 2 subunit beta		0.002	2.42991	1	1	1	60.1	4.42
B2R823	cDNA, FLJ93703, highly similar to Homo sapiens putatative 28 kDa protein (LOC56902), mRNA		0.002	6.34921	1	3	1	27.9	9.73
A0A140VJX1	Testicular tissue protein Li 198		0.002	3.0445	1	1	1	45.2	8.85
B2RAU5	Sorting nexin		0.002	2.01681	1	1	1	66.5	5.66
B2R7B5	cDNA, FLJ93365, highly similar to Homo sapiens KH domain containing, RNA binding, signal transduction associated 1 (KHDRBS1), mRNA		0.002	2.0316	1	2	1	48.2	8.66
B2R4D5	Actin-related protein 2/3 complex subunit 3		0.002	7.30337	1	2	1	20.5	8.59
A8K489	cDNA FLJ76151, highly similar to Homo sapiens Wilms tumor 1 associated protein (WTAP), transcript variant 1, mRNA		0.002	3.78788	1	3	1	44.2	5.25
B7Z2B5	cDNA FLJ54713, highly similar to Gephyrin		0.002	1.79028	1	1	1	84.7	5.73
Q9H2L7	DC33		0.002	3.92857	1	1	1	29.5	11.39
Q59EC0	Adenosine deaminase, RNA-specific isoform ADAR-a variant (Fragment)		0.003	1.20579	1	1	1	137.7	8.48
Q59GX7	Stearoyl-CoA desaturase variant (Fragment)		0.004	3.55191	1	2	1	42.3	9.25
A0A193CHR3	10E8 heavy chain variable region (Fragment)		0.004	12.2137	1	4	1	14.6	4.84
Q59GW5	Tripartite motif-containing 25 variant (Fragment)		0.007	1.86335	1	1	1	72.2	8.06
A0A125QYY8	IBM-B1 light chain variable region (Fragment)		0.007	11.6071	1	4	1	12.2	8.5
A8K8U1	cDNA FLJ77762, highly similar to Homo sapiens cullin-associated and neddylation-dissociated 1 (CAND1), mRNA		0.008	0.97561	1	1	1	136.2	5.83
E5KT65	DNA-directed RNA polymerase subunit RPABC1		0.002	8.09524	1	2	1	24.5	5.95
F5H423	Uncharacterized protein		0.002	6.66667	1	2	1	23.3	8.6
O14639	Actin-binding LIM protein 1	ABLIM1	0	3.59897	2	10	1	87.6	8.59									2	1	1	0.0571755	0.0285225	0.0294898	0.038396	0.0162708
A6NK06	Cis-aconitate decarboxylase	ACOD1	0.002	3.9501	1	1	1	52.6	7.46
O43707	Alpha-actinin-4	ACTN4	0	7.24479	5	22	1	104.8	5.44									3	6	5	0.0857633	0.171135	0.147449	0.134783	0.0440729
P61160	Actin-related protein 2	ACTR2	0	9.39086	3	13	1	44.7	6.74
Q16186	Proteasomal ubiquitin receptor ADRM1	ADRM1	0.008	3.9312	1	6	1	42.1	5.07
O00116	Alkyldihydroxyacetonephosphate synthase, peroxisomal	AGPS	0	2.58359	1	6	1	72.9	7.34
Q12802	A-kinase anchor protein 13	AKAP13	0.002	0.568788	1	1	1	307.4	5.24
O43823	A-kinase anchor protein 8	AKAP8	0.002	1.87861	1	4	1	76.1	5.15
P51648	Fatty aldehyde dehydrogenase	ALDH3A2	0	8.65979	3	7	1	54.8	7.88
O75179	Ankyrin repeat domain-containing protein 17	ANKRD17	0	0.729927	1	3	1	274.1	6.52
A0A140VJE8	AP complex subunit beta	AP2B1	0.002	1.36698	1	1	1	105.6	5.34
O15085	Rho guanine nucleotide exchange factor 11	ARHGEF11	0	1.97109	2	4	1	167.6	5.5
V9GYM8	Rho guanine nucleotide exchange factor 2	ARHGEF2	0.002	1.4549	1	1	1	116	7.37
Q9H1I8	Activating signal cointegrator 1 complex subunit 2	ASCC2	0	1.5852	1	3	1	86.3	5.16
Q12797	Aspartyl/asparaginyl beta-hydroxylase	ASPH	0	5.67282	2	2	1	85.8	5.01
P05023	Sodium/potassium-transporting ATPase subunit alpha-1	ATP1A1	0	8.3089	6	22	1	112.8	5.49
P30049	ATP synthase subunit delta, mitochondrial	ATP5D	0.008	8.33333	1	3	1	17.5	5.49
P56385	ATP synthase subunit e, mitochondrial	ATP5I	0.002	20.2899	1	2	1	7.9	9.35
Q9UHR4	Brain-specific angiogenesis inhibitor 1-associated protein 2-like protein 1	BAIAP2L1	0.003	2.93542	1	4	1	56.8	8.68
D6RDG3	Transcription factor BTF3 (Fragment)	BTF3	0.005	9.17431	1	3	1	11.8	5.9
O43709	Probable 18S rRNA (guanine-N(7))-methyltransferase	BUD23	0.003	5.69395	1	5	1	31.9	8.73
Q549M8	CLE7	C14orf166	0.002	6.55738	1	3	1	28.1	6.65
Q9H8G2	Caspase activity and apoptosis inhibitor 1	CAAP1	0	4.43213	1	4	1	38.3	4.72
Q9Y654	Heterochromatin-specific nonhistone protein (Fragment)	CBX1	0.004	10.4575	1	1	1	17.5	4.89
P50990	T-complex protein 1 subunit theta	CCT8	0	5.29197	2	8	1	59.6	5.6
A0A024QZC1	CD2 antigen (Cytoplasmic tail) binding protein 2, isoform CRA_a	CD2BP2	0.005	4.10557	1	3	1	37.6	4.61
A0A024R880	Cyclin-dependent kinase 9 (CDC2-related kinase), isoform CRA_a	CDK9	0	6.72043	2	2	1	42.8	8.79
Q9NXV6	CDKN2A-interacting protein	CDKN2AIP	0.008	2.41379	1	2	1	61.1	9.01
D2IYL2	Corneodesmosin	CDSN	0.002	3.40265	1	5	1	51.5	8.35
Q5SW79	Centrosomal protein of 170 kDa	CEP170	0.002	0.883838	1	1	1	175.2	7.11
Q9Y6A4	Cilia- and flagella-associated protein 20	CFAP20	0	6.21762	1	4	1	22.8	9.76
Q8WWK9	Cytoskeleton-associated protein 2	CKAP2	0.004	1.90337	1	1	1	76.9	9.41
A0A0S2Z471	Creatine kinase brain isoform 2 (Fragment)	CKB	0	19.5062	5	16	1	44.9	6.11
Q14028	Cyclic nucleotide-gated cation channel beta-1	CNGB1	0.002	0.799361	1	1	1	139.6	4.81
P09543	2',3'-cyclic-nucleotide 3'-phosphodiesterase	CNP	0	7.36342	2	9	1	47.5	9.07
O75128	Protein cordon-bleu	COBL	0.002	1.18953	1	3	1	135.5	7.75
P53621	Coatomer subunit alpha	COPA	0.002	2.04248	2	4	1	138.3	7.66
A0A097Q0T5	Cytochrome c oxidase subunit 2	COX2	0.002	7.04846	1	4	1	25.5	4.75
H9STE0	Cytochrome c oxidase subunit 2	COX2	0.003	6.92641	1	2	1	25.9	4.82
H0UI06	Cytochrome c oxidase subunit 7A2, mitochondrial	COX7A2	0.002	11.3043	1	1	1	12.8	9.13
Q10570	Cleavage and polyadenylation specificity factor subunit 1	CPSF1	0.007	0.900901	1	1	1	160.8	6.4
P61962	DDB1- and CUL4-associated factor 7	DCAF7	0	4.38596	1	2	1	38.9	5.52
Q9UJW0	Dynactin subunit 4	DCTN4	0	5.43478	2	5	1	52.3	7.34
A0A024RAD5	Dolichyl-diphosphooligosaccharide--protein glycosyltransferase 48 kDa subunit	DDOST	0.007	2.41228	1	3	1	50.7	6.4
P35659	Protein DEK	DEK	0.005	3.2	1	1	1	42.6	8.56
Q99615	DnaJ homolog subfamily C member 7	DNAJC7	0	5.06073	2	2	1	56.4	6.96
Q9Y295	Developmentally-regulated GTP-binding protein 1	DRG1	0	11.4441	3	12	1	40.5	8.9
Q4W4Y1	Dopamine receptor interacting protein 4	DRIP4	0	5.18433	3	4	1	96	6.52
Q14126	Desmoglein-2	DSG2	0	3.22004	2	4	1	122.2	5.24
Q96F86	Enhancer of mRNA-decapping protein 3	EDC3	0	2.75591	1	2	1	56	7.11
A0A024R3W7	Eukaryotic translation elongation factor 1 beta 2, isoform CRA_a	EEF1B2	0.002	5.77778	1	5	1	24.7	4.67
P26641	Elongation factor 1-gamma	EEF1G	0.002	2.97483	1	4	1	50.1	6.67
Q96C19	EF-hand domain-containing protein D2	EFHD2	0	9.16667	2	6	1	26.7	5.2
B5BU01	Eukaryotic translation initiation factor 2 beta	EIF2S2	0	7.20721	2	6	1	38.3	5.94
P55884	Eukaryotic translation initiation factor 3 subunit B	EIF3B	0.002	1.7199	1	3	1	92.4	5
B3KSH1	Eukaryotic translation initiation factor 3 subunit F	EIF3F	0	4.56989	1	1	1	39.1	5.45
B3KS98	Eukaryotic translation initiation factor 3 subunit H	EIF3S3	0.002	5.19126	1	4	1	41.6	7.33
Q4LE58	eIF4G1 variant protein (Fragment)	EIF4G1 variant protein	0	3.50985	4	5	1	178	5.31
P50402	Emerin	EMD	0	14.5669	3	16	1	29	5.5
A0A0S3CPE7	Envelope glycoprotein (Fragment)	env	0.002	4.62428	1	12	1	39.3	8.44
A7U979	Envelope glycoprotein (Fragment)	env	0.003	4.74777	1	1	1	37.7	8.76
T2CME2	Envelope glycoprotein gp160	env	0.008	1.75029	1	10	1	96.3	8.38
P07814	Bifunctional glutamate/proline--tRNA ligase	EPRS	0.007	1.19048	1	1	1	170.5	7.33
Q9UBC2	Epidermal growth factor receptor substrate 15-like 1	EPS15L1	0.002	1.85185	1	1	1	94.2	5.11
P30040	Endoplasmic reticulum resident protein 29	ERP29	0.006	5.74713	1	2	1	29	7.31
A0A0A0MRJ7	Coagulation factor V	F5	0.002	0.583221	1	1	1	252.1	6.05
Q9NSI2	Protein FAM207A	FAM207A	0.004	6.08696	1	1	1	25.4	11.08
Q8NCA5	Protein FAM98A	FAM98A	0	2.89017	1	3	1	55.4	9.03
P49327	Fatty acid synthase	FASN	0	2.27001	4	10	1	273.3	6.44
C9JC84	Fibrinogen gamma chain	FGG	0.002	2.60304	1	2	1	52.3	5.63
P20930	Filaggrin	FLG	0	0.566363	2	6	1	434.9	9.25
Q8NF17	FLJ00385 protein (Fragment)	FLJ00385	0.007	1.76817	1	9	1	56.1	7.59
X5D907	Fragile X mental retardation 1 isoform C (Fragment)	FMR1	0.002	2.52525	1	1	1	66.9	7.23
Q14331	Protein FRG1	FRG1	0.002	5.03876	1	2	1	29.2	9.01
A0A024RDE5	Ras-GTPase activating protein SH3 domain-binding protein 2, isoform CRA_a	G3BP2	0	6.84647	2	7	1	54.1	5.55
Q9BVP2	Guanine nucleotide-binding protein-like 3	GNL3	0.002	3.82514	2	5	1	62	9.16
Q08379	Golgin subfamily A member 2	GOLGA2	0.002	1.1976	1	1	1	113	5.02
Q12849	G-rich sequence factor 1	GRSF1	0	5.83333	2	7	1	53.1	6.19
Q00403	Transcription initiation factor IIB	GTF2B	0.002	6.32911	1	1	1	34.8	8.35
X5DR09	General transcription factor IIi isoform A (Fragment)	GTF2I	0	2.80561	2	4	1	112.3	6.39
H3BS72	Very-long-chain (3R)-3-hydroxyacyl-CoA dehydratase	HACD3	0.002	3.5	1	4	1	47.1	8.85
A0A024R9P1	HCG2026745, isoform CRA_a	hCG_2026745	0	4.91803	1	2	1	34.1	11.81
Q7Z4V5	Hepatoma-derived growth factor-related protein 2	HDGFRP2	0	5.06706	2	15	1	74.3	7.49
V9HWE9	Epididymis secretory protein Li 22	HEL-S-22	0	9.04762	1	3	1	23.3	5.64
A0A0K0K1K4	Proteasome subunit alpha type	HEL-S-276	0.002	6.04839	1	2	1	27.9	8.46
V9HW12	Epididymis secretory sperm binding protein Li 2a	HEL-S-2a	0	14.1414	2	19	1	21.9	5.97
V9HW37	Epididymis secretory protein Li 69	HEL-S-69	0	4.80591	2	3	1	59.6	5.66
Q1KMD3	Heterogeneous nuclear ribonucleoprotein U-like protein 2	HNRNPUL2	0	1.87416	1	1	1	85.1	4.91
A0A0A0MS14	Immunoglobulin heavy variable 1-45	IGHV1-45	0	9.40171	1	6	1	13.5	9.1
Q9NRY2	SOSS complex subunit C	INIP	0.007	12.5	1	1	1	11.4	9.25
A4QPB0	IQ motif containing GTPase activating protein 1	IQGAP1	0	3.3796	4	11	1	189.2	6.48
Q8N9B5	Junction-mediating and -regulatory protein	JMY	0.002	1.417	1	4	1	111.4	6.18
Q71RC2	La-related protein 4	LARP4	0.002	1.79558	1	1	1	80.5	6.61
Q9Y4W2	Ribosomal biogenesis protein LAS1L	LAS1L	0	2.31608	1	1	1	83	4.73
A0A024R1S8	LIM and SH3 protein 1, isoform CRA_b	LASP1	0.002	10.3448	2	2	1	29.7	7.05
O95202	LETM1 and EF-hand domain-containing protein 1, mitochondrial	LETM1	0	1.62382	1	3	1	83.3	6.7
P09382	Galectin-1	LGALS1	0	11.8519	1	3	1	14.7	5.5
A0A0S2Z3Y1	Lectin galactoside-binding soluble 3 binding protein isoform 1 (Fragment)	LGALS3BP	0.002	2.22222	1	2	1	65.3	5.27
P49916	DNA ligase 3	LIG3	0.002	1.48662	1	1	1	112.8	9.01
P02545	Prelamin-A/C	LMNA	0.003	2.10843	1	1	1	74.1	7.02
A4D0W6	Similar to ribosomal protein L18; 60S ribosomal protein L18	LOC136143	0.002	5.80357	1	14	1	24.9	9.7
Q5VUJ6	Leucine-rich repeat and calponin homology domain-containing protein 2	LRCH2	0.002	1.43791	1	6	1	84.5	6.55
K7ELG9	Protein LSM12 homolog	LSM12	0	5.65217	1	4	1	24.9	7.42
A0A024RAC0	Leucine zipper protein 1, isoform CRA_a	LUZP1	0	6.41264	5	12	1	120.2	8.63									1	1	1	0.0285878	0.0285225	0.0294898	0.0288667	0.000540621
A0A087WZ40	Ensconsin	MAP7	0	3.46598	2	5	1	87.8	9.77
P31153	S-adenosylmethionine synthase isoform type-2	MAT2A	0.007	3.79747	1	4	1	43.6	6.48
Q9BTE3	Mini-chromosome maintenance complex-binding protein	MCMBP	0.002	1.55763	1	1	1	72.9	5.87
A0A024R1M6	Uncharacterized protein	MGC3731	0.002	6.10329	1	10	1	24.6	10.23
Q9UBU8	Mortality factor 4-like protein 1	MORF4L1	0.007	3.59116	1	1	1	41.4	9.28
Q96A35	39S ribosomal protein L24, mitochondrial	MRPL24	0.002	6.01852	1	1	1	24.9	9.29
S4R369	39S ribosomal protein L37, mitochondrial	MRPL37	0.002	3.31263	1	1	1	54.9	9.42
Q9NQ50	39S ribosomal protein L40, mitochondrial	MRPL40	0	7.76699	1	5	1	24.5	9.63
Q7Z7F7	39S ribosomal protein L55, mitochondrial	MRPL55	0.002	12.5	1	1	1	15.1	11.15
P82650	28S ribosomal protein S22, mitochondrial	MRPS22	0.002	3.33333	1	4	1	41.3	7.9
Q92552	28S ribosomal protein S27, mitochondrial	MRPS27	0	3.62319	1	2	1	47.6	6.18
A0A0A0MR39	Myelin expression factor 2	MYEF2	0.002	1.83333	1	1	1	64.1	8.87
P28331	NADH-ubiquinone oxidoreductase 75 kDa subunit, mitochondrial	NDUFS1	0	4.40165	2	6	1	79.4	6.23
O75306	NADH dehydrogenase [ubiquinone] iron-sulfur protein 2, mitochondrial	NDUFS2	0.008	2.59179	1	1	1	52.5	7.55
O75489	NADH dehydrogenase [ubiquinone] iron-sulfur protein 3, mitochondrial	NDUFS3	0.002	6.43939	1	5	1	30.2	7.5
F5GXJ1	NADH dehydrogenase [ubiquinone] iron-sulfur protein 7, mitochondrial	NDUFS7	0.002	5.9322	1	1	1	25.4	9.89
Q9BYG3	MKI67 FHA domain-interacting nucleolar phosphoprotein	NIFK	0	15.3584	3	4	1	34.2	9.88
A0A024R8R4	Nuclear protein localization 4 homolog (S. cerevisiae), isoform CRA_a	NPLOC4	0.002	2.96053	1	1	1	68.1	6.38
A0A024R6W2	Nudix (Nucleoside diphosphate linked moiety X)-type motif 21, isoform CRA_a	NUDT21	0	19.3833	4	12	1	26.2	8.82
Q7Z417	Nuclear fragile X mental retardation-interacting protein 2	NUFIP2	0	1.8705	1	6	1	76.1	8.7
A0A024QZW7	Nucleoporin 153kDa, isoform CRA_a	NUP153	0.002	0.881356	1	1	1	153.9	8.73
P04181	Ornithine aminotransferase, mitochondrial	OAT	0.003	2.2779	1	2	1	48.5	7.03
A0A024R8S5	Protein disulfide-isomerase	P4HB	0	5.51181	2	5	1	57.1	4.87
Q05D08	PA2G4 protein (Fragment)	PA2G4	0	5.41872	2	5	1	45.1	8.95
Q13442	28 kDa heat- and acid-stable phosphoprotein	PDAP1	0	14.9171	2	3	1	20.6	8.87
P11177	Pyruvate dehydrogenase E1 component subunit beta, mitochondrial	PDHB	0	8.91365	2	3	1	39.2	6.65
P13667	Protein disulfide-isomerase A4	PDIA4	0.002	3.56589	2	6	1	72.9	5.07
D9IAI1	Epididymis secretory protein Li 34	PEBP1	0.002	10.6952	1	3	1	21	7.53
B4E0T2	Peroxisomal targeting signal 1 receptor	PEX5	0	5	2	3	1	73.1	4.61
Q9UHV9	Prefoldin subunit 2	PFDN2	0.002	9.09091	1	1	1	16.6	6.58
P07737	Profilin-1	PFN1	0	31.4286	3	20	1	15	8.27
P01833	Polymeric immunoglobulin receptor	PIGR	0.001	2.09424	1	7	1	83.2	5.74
Q9Y237	Peptidyl-prolyl cis-trans isomerase NIMA-interacting 4	PIN4	0.002	9.16031	1	3	1	13.8	9.77
Q13835	Plakophilin-1	PKP1	0	3.61446	2	2	1	82.8	9.13
Q99959	Plakophilin-2	PKP2	0.002	1.24858	1	1	1	97.4	9.33
Q8N3E9	1-phosphatidylinositol 4,5-bisphosphate phosphodiesterase delta-3	PLCD3	0	1.90114	1	4	1	89.2	6.98
O15160	DNA-directed RNA polymerases I and III subunit RPAC1	POLR1C	0.002	3.75723	1	2	1	39.2	5.5
P52434	DNA-directed RNA polymerases I, II, and III subunit RPABC3	POLR2H	0.002	8.66667	1	2	1	17.1	4.68
A0A0A0MS24	Protein phosphatase 1 regulatory subunit	PPP1R12B	0.001	2.58869	2	3	1	116.4	5.85
A0A0S2Z556	Polyglutamine binding protein 1 isoform 2 (Fragment)	PQBP1	0.004	4.27046	1	1	1	32.2	6.34
P30048	Thioredoxin-dependent peroxide reductase, mitochondrial	PRDX3	0.002	5.46875	1	2	1	27.7	7.78
P78527	DNA-dependent protein kinase catalytic subunit	PRKDC	0	0.944767	3	4	1	468.8	7.12
Q8WWY3	U4/U6 small nuclear ribonucleoprotein Prp31	PRPF31	0.002	4.80962	2	4	1	55.4	5.78
Q14558	Phosphoribosyl pyrophosphate synthase-associated protein 1	PRPSAP1	0.002	3.93258	1	1	1	39.4	7.2
Q5JSZ5	Protein PRRC2B	PRRC2B	0.002	0.672948	1	2	1	242.8	8.34
Q9Y520	Protein PRRC2C	PRRC2C	0.002	0.345304	1	3	1	316.7	9.13
P43686	26S protease regulatory subunit 6B	PSMC4	0.002	4.30622	1	1	1	47.3	5.21
P62195	26S protease regulatory subunit 8	PSMC5	0.004	3.20197	1	2	1	45.6	7.55
Q5VWC4	26S proteasome non-ATPase regulatory subunit 4	PSMD4	0	5.78947	2	3	1	41.1	4.81
Q15254	Prothymosin alpha	PTMA	0	22.2222	2	9	1	11.8	3.81
P51151	Ras-related protein Rab-9A	RAB9A	0.002	6.96517	1	3	1	22.8	5.47
A0A024R136	Rac GTPase activating protein 1, isoform CRA_a	RACGAP1	0.002	2.53165	1	3	1	71	8.88
F6WQW2	Ran-specific GTPase-activating protein	RANBP1	0.002	7.19424	2	2	1	31.9	8.75
Q09028	Histone-binding protein RBBP4	RBBP4	0	5.17647	2	14	1	47.6	4.89									1	3	1	0.0285878	0.0855676	0.0294898	0.0478817	0.03264
A0A0A0MR66	RNA binding motif protein 10, isoform CRA_d	RBM10	0	3.71859	3	3	1	110.3	6.28
Q96T37	Putative RNA-binding protein 15	RBM15	0.002	1.43296	1	3	1	107.1	10.08
D2K3X6	Replication initiation protein RepE	repE	0.002	4.78088	1	3	1	29.3	9.42
P35251	Replication factor C subunit 1	RFC1	0	2.26481	2	2	1	128.2	9.36
P35249	Replication factor C subunit 4	RFC4	0.002	3.85675	1	3	1	39.7	8.02
Q5UIP0	Telomere-associated protein RIF1	RIF1	0	1.86084	3	5	1	274.3	5.52
H0Y8C2	60S ribosomal protein L22-like 1 (Fragment)	RPL22L1	0	8.4507	1	10	1	16.9	9.25
P39023	60S ribosomal protein L3	RPL3	0.002	2.97767	1	5	1	46.1	10.18
F8W727	60S ribosomal protein L32	RPL32	0	13.0719	2	6	1	18	10.59
A0A024R8P8	Ribosomal protein L38, isoform CRA_a	RPL38	0.002	18.5714	1	1	1	8.2	10.1
P62891	60S ribosomal protein L39	RPL39	0.002	19.6078	1	3	1	6.4	12.56
Q14684	Ribosomal RNA processing protein 1 homolog B	RRP1B	0.004	2.11082	1	1	1	84.4	9.76
Q9Y3I0	tRNA-splicing ligase RtcB homolog	RTCB	0.006	1.78218	1	1	1	55.2	7.23
B5BUB1	RuvB-like helicase (Fragment)	RUVBL1	0.002	2.85088	1	3	1	50.2	6.42
Q14151	Scaffold attachment factor B2	SAFB2	0	2.51836	2	4	1	107.4	6.16
Q15637	Splicing factor 1	SF1	0	8.13772	4	14	1	68.3	8.98
Q05DF2	SF3A2 protein (Fragment)	SF3A2	0	2.9106	1	5	1	51.4	10.11
O75533	Splicing factor 3B subunit 1	SF3B1	0	3.06748	3	5	1	145.7	7.09
Q9Y3B4	Splicing factor 3B subunit 6	SF3B6	0	20.8	2	5	1	14.6	9.38
A0A024R8U5	Splicing factor, arginine/serine-rich 2, isoform CRA_a	SFRS2	0	11.3122	2	2	1	25.5	11.85
D9HTE9	Plasma membrane citrate carrier	SLC25A1	0.002	7.2327	2	4	1	35	9.99
X6R3P0	Slit homolog 2 protein	SLIT2	0	2.14008	2	2	1	171.2	6.84
Q14683	Structural maintenance of chromosomes protein 1A	SMC1A	0.002	0.81103	1	3	1	143.1	7.64
Q8ND04	Protein SMG8	SMG8	0	2.4218	1	2	1	109.6	7.68
O75643	U5 small nuclear ribonucleoprotein 200 kDa helicase	SNRNP200	0	1.59176	2	4	1	244.4	6.06
Q8WVK2	U4/U6.U5 small nuclear ribonucleoprotein 27 kDa protein	SNRNP27	0.002	9.67742	1	1	1	18.8	11.62
B5BTZ8	Small nuclear ribonucleoprotein polypeptide B''	SNRPB2	0.007	4.88889	1	10	1	25.4	9.72
B1AHD1	NHP2-like protein 1	SNU13	0.005	9.09091	1	1	1	14.6	8.46
A0A024QYY9	Spectrin domain with coiled-coils 1, isoform CRA_a	SPECC1	0	2.05993	2	5	1	118.5	6.7
D3DR65	SPFH domain family, member 1, isoform CRA_a	SPFH1	0.002	3.44828	1	1	1	39.1	7.87
O15020	Spectrin beta chain, non-erythrocytic 2	SPTBN2	0	1.29707	3	9	1	271.2	6.11									2	1	3	0.0571755	0.0285225	0.0884695	0.0580558	0.0299832
A2RUF3	SLIT-ROBO Rho GTPase activating protein 2	SRGAP2	0	2.33427	2	5	1	120.8	6.7
Q9UHB9	Signal recognition particle subunit SRP68	SRP68	0	12.4402	5	13	1	70.7	8.56
Q9Y5M8	Signal recognition particle receptor subunit beta	SRPRB	0	11.8081	2	3	1	29.7	9.04
Q9BXP5	Serrate RNA effector molecule homolog	SRRT	0.003	1.48402	1	2	1	100.6	5.96
B5BUB5	Autoantigen La (Fragment)	SSB	0	5.88235	2	8	1	46.8	7.12
P51571	Translocon-associated protein subunit delta	SSR4	0.002	7.51445	1	4	1	19	6.15
O60232	Sjoegren syndrome/scleroderma autoantigen 1	SSSCA1	0.002	8.54271	1	2	1	21.5	5.24
Q9UNE7	E3 ubiquitin-protein ligase CHIP	STUB1	0	4.9505	1	1	1	34.8	5.87
P23193	Transcription elongation factor A protein 1	TCEA1	0.002	3.98671	1	3	1	33.9	8.38
A0A024R355	Three prime histone mRNA exonuclease 1, isoform CRA_b	THEX1	0.002	4.29799	1	5	1	40	6.7
O43615	Mitochondrial import inner membrane translocase subunit TIM44	TIMM44	0.002	2.87611	1	1	1	51.3	8.32
A0A1B0GTW1	Tight junction protein ZO-2	TJP2	0	4.08327	4	9	1	140.6	8.19
H0Y9X1	Translation machinery-associated protein 16 (Fragment)	TMA16	0	8.26446	1	1	1	27.7	9.57
Q96GM8	Target of EGR1 protein 1	TOE1	0	2.7451	1	2	1	56.5	7.18
B9EG90	Topoisomerase (DNA) I	TOP1	0.002	3.39869	2	3	1	90.6	9.31
Q9H2D6	TRIO and F-actin-binding protein	TRIOBP	0.002	0.761099	1	2	1	261.2	8.48
Q9UI30	Multifunctional methyltransferase subunit TRM112-like protein	TRMT112	0	22.4	2	8	1	14.2	5.26
Q12792	Twinfilin-1	TWF1	0.002	3.71429	1	4	1	40.3	6.96
A0A087WTW0	E3 ubiquitin-protein ligase UHRF1	UHRF1	0.003	1.16686	1	2	1	96.6	8.34
Q93008	Probable ubiquitin carboxyl-terminal hydrolase FAF-X	USP9X	0.002	0.428016	1	2	1	292.1	5.8
P46939	Utrophin	UTRN	0.003	0.407807	1	1	1	394.2	5.33
P21796	Voltage-dependent anion-selective channel protein 1	VDAC1	0	8.48057	2	10	1	30.8	8.54
Q9Y5A9	YTH domain-containing family protein 2	YTHDF2	0	6.90846	3	5	1	62.3	8.79
A0A087WY31	YTH domain-containing family protein 3	YTHDF3	0.002	2.21088	1	3	1	64.5	8.24
Q8WU90	Zinc finger CCCH domain-containing protein 15	ZC3H15	0.002	3.28638	1	5	1	48.6	5.31
A0A087WXF8	Nucleolar protein of 40 kDa	ZCCHC17	0	11.4068	2	4	1	29.6	9.64
[truncated: 24 more columns]
