# Supplementary material for: Identification of Inflammatory Proteomics Networks of Toll-like Receptor 4 through Immunoprecipitation-Based Chemical Cross-Linking Proteomics
Source: Proteomes. 2022 Sep 1;10(3):31. doi: 10.3390/proteomes10030031 (PMC9506174; doi:10.3390/proteomes10030031)
Supplement: Supplementary file 1 [file proteomes-10-00031-s001.zip › Supplementary-Table -S2.xlsx]

## Sheet: Heat Map and TLR4 Network data
	Supplementary Table S2. Average Normalized PSMs percentage and Fold change of PSMs were used for generating Heatmap and TLR4 signaling networks respectively.							HEAT MAP												TLR4 Network through IPA
Accession	Description	Gene Name	Exp. q-value	Coverage	Peptides	MW [kDa]	calc. pI	Control	LPS	Statin	LPS-Statin	Control-XL	LPS-XL	Statin-XL	LPS-Statin-XL		LPS/CONTROL	Statin/Control	(LPS-Statin)/Control	Fold Change LPS	Fold Change Statin	Fold Change (Statin+LPS)
Q8WVX7	Ribosomal protein S19 (Fragment)		0	46.4968	8	17.3	10.52	0.203058	0.038396	0.06502	0.0533681	0.174441	0.170693	0.495435	0.527746		0.189088	0.320203	0.262822	-5.28854	-3.12302	-3.80486
A0A024R1N4	X-ray repair complementing defective repair in Chinese hamster cells 6 (Ku autoantigen, 70kDa), isoform CRA_a	XRCC6	0	30.2135	16	69.8	6.64	0.33042	0.0672627	0.115619	0.0752167	0.180289	0.217775	0.619895	0.385104		0.203567	0.349916	0.22764	-4.91239	-2.85783	-4.39291
Q7Z406	Myosin-14	MYH14	0	25.0125	44	227.7	5.6	1.18831	0.259134	0.286887	0.504223	1.01599	1.375	0.233685	0.435349		0.218069	0.241424	0.424318	-4.58571	-4.14209	-2.35672
Q59GY2	Ribosomal protein L4 variant (Fragment)		0	22.9025	9	49	11.02	0.174027	0.0386966	0.0777992	0.118949	0.0965125	0.101629	0.176731	0.211211		0.22236	0.447052	0.683507	-4.49721	-2.23687	-1.46304
P30050	60S ribosomal protein L12	RPL12	0	42.4242	5	17.8	9.42	0.197199	0.0485266	0.0390691	0.0749765	0.144769	0.169501	0.0551905	0		0.246079	0.19812	0.380208	-4.06373	-5.04744	-2.63014
P35579	Myosin-9	MYH9	0	63.6735	147	226.4	5.6	7.71899	2.13575	2.19071	3.975	7.2289	9.2919	2.0099	1.9176		0.276688	0.283807	0.514964	-3.61419	-3.52352	-1.94188
P62847	40S ribosomal protein S24	RPS24	0	28.5714	3	15.4	10.78	0.15076	0.0482259	0.0390691	0.0859182	0.144751	0.166321	0	0		0.319886	0.259148	0.569902	-3.12612	-3.8588	-1.75469
A0A024RBS2	60S acidic ribosomal protein P0	RPLP0	0	47.6341	11	34.3	5.97	0.237975	0.0773933	0.103411	0.0863987	0.229031	0.312797	0.144286	0.0914468		0.325217	0.434547	0.363058	-3.07487	-2.30125	-2.75438
P04406	Glyceraldehyde-3-phosphate dehydrogenase	GAPDH	0	25.0746	6	36	8.46	0.110155	0.0383742	0.116868	0.0541236	0.114004	0.0838188	0.231282	0.384608		0.348365	1.06094	0.49134	-2.87055	1.06094	-2.03525
J3QRS3	Myosin regulatory light chain 12A	MYL12A	0	50.8475	9	20.4	4.75	1.3222	0.499618	0.467866	0.698629	1.36374	1.73122	0.331446	0.238772		0.377868	0.353853	0.528382	-2.64643	-2.82603	-1.89257
P22626	Heterogeneous nuclear ribonucleoproteins A2/B1	HNRNPA2B1	0	33.711	10	37.4	8.95	0.272488	0.10626	0.155991	0.161856	0.24557	0.142104	0.608736	0.31619		0.389962	0.572468	0.593991	-2.56435	-1.74682	-1.68353
Q5HYL6	Putative uncharacterized protein DKFZp686E1899	DKFZp686E1899	0	38.3523	11	39.5	5.19	0.313208	0.125297	0.064681	0.141793	0.389766	0.343025	0	0		0.400043	0.206511	0.452711	-2.49973	-4.84235	-2.20891
Q6NVC0	SLC25A5 protein (Fragment)	SLC25A5	0	13.9319	4	35.3	9.82	0.0695958	0.0288667	0.0515628	0.0978208	0.0297075	0.0520873	0.167121	0.13185		0.414777	0.74089	1.40556	-2.41094	-1.34973	1.40556
B1PS43	Myosin heavy chain 11 smooth muscle isoform	MYH11	0	10.5964	25	234.1	5.8	1.67566	0.702265	0.652252	1.02165	1.31028	1.91571	0.564827	0.634322		0.419098	0.389251	0.609703	-2.38608	-2.56904	-1.64014
V9HWB4	Epididymis secretory sperm binding protein Li 89n	HEL-S-89n	0	48.4709	26	72.3	5.16	0.927811	0.414029	0.573596	0.526827	0.93546	0.656418	1.87887	1.30516		0.446243	0.618225	0.567817	-2.24093	-1.61753	-1.76113
Q8N1C8	HSPA9 protein (Fragment)	HSPA9	0	24.5228	13	73.8	6.37	0.191425	0.085977	0.0390691	0.106496	0.210499	0.147357	0.342393	0.396846		0.449143	0.204096	0.556334	-2.22646	-4.89965	-1.79748
A0A024R4Q8	Ribosomal protein S5, isoform CRA_a	RPS5	0	41.6667	8	22.9	9.72	0.313158	0.143968	0.0915953	0.130371	0.324988	0.317454	0.289178	0.212506		0.459728	0.292489	0.41631	-2.1752	-3.41893	-2.40206
P06733	Alpha-enolase	ENO1	0	32.0276	9	47.1	7.39	0.104386	0.0482259	0.168092	0.0643099	0.112964	0.0888241	0	0.130749		0.461996	1.61029	0.616077	-2.16452	1.61029	-1.62317
P62979	Ubiquitin-40S ribosomal protein S27a	RPS27A	0	36.5385	4	18	9.64	0.121678	0.0577334	0.0656444	0.108247	0.144197	0.0970954	0	0		0.474476	0.539492	0.88962	-2.10759	-1.85359	-1.12408
P04259	Keratin, type II cytoskeletal 6B	KRT6B	0	40.7801	21	60	8	0.400262	0.191915	0.829377	0.162371	0.415255	0.413196	1.0037	1.27963		0.479472	2.07208	0.405661	-2.08563	2.07208	-2.46511
Q86YZ3	Hornerin	HRNR	0	24.807	23	282.2	10.04	0.249231	0.124996	0.206251	0.117918	0.265054	0.272322	0.166908	0.331169		0.501527	0.827551	0.473128	-1.99391	-1.20838	-2.11359
P35580	Myosin-10	MYH10	0	59.3623	135	228.9	5.54	6.15891	3.14497	3.23308	3.93707	4.91293	7.0271	1.50583	1.34496		0.510637	0.524943	0.639248	-1.95834	-1.90497	-1.56434
Q53GG0	Epithelial protein lost in neoplasm beta variant (Fragment)		0	40.0527	25	85.2	6.84	0.469627	0.241043	0.169056	0.204042	0.75777	0.469058	0.175788	0.169857		0.513264	0.359979	0.434477	-1.94831	-2.77794	-2.30162
P26373	60S ribosomal protein L13	RPL13	0	39.3365	11	24.2	11.65	0.197189	0.105959	0.0915953	0.1291	0.18716	0.152325	0.0876356	0.106577		0.53735	0.464506	0.654703	-1.86099	-2.15283	-1.52741
D3DQ70	SERPINE1 mRNA binding protein 1, isoform CRA_d	SERBP1	0	14.4086	5	50.9	9.33	0.173972	0.0957852	0.142195	0.204077	0.199358	0.214472	0.297025	0.223944		0.550579	0.817344	1.17305	-1.81627	-1.22347	1.17305
P81605	Dermcidin	DCD	0	35.4545	4	11.3	6.54	0.15669	0.0866219	0.130325	0.075732	0.120337	0.169463	0.367205	0.526947		0.552824	0.831742	0.483324	-1.80889	-1.2023	-2.069
P55795	Heterogeneous nuclear ribonucleoprotein H2	HNRNPH2	0	13.363	4	49.2	6.3	0.162293	0.0961076	0.0781382	0.0635544	0.108156	0.132006	0.333119	0.277384		0.592186	0.481464	0.391603	-1.68866	-2.077	-2.55361
P19338	Nucleolin	NCL	0	30.9859	20	76.6	4.7	0.33641	0.201422	0.181264	0.224174	0.252422	0.326992	0.299518	0.236031		0.598739	0.538818	0.666371	-1.67018	-1.85592	-1.50067
B2R5W3	Poly [ADP-ribose] polymerase		0	20.4142	18	113	8.88	0.371065	0.231535	0.260026	0.22517	0.264586	0.203096	0.233168	0.263549		0.623974	0.700757	0.60682	-1.60263	-1.42703	-1.64793
J3KN67	Tropomyosin alpha-3 chain	TPM3	0	28.4211	8	33.2	4.77	0.150765	0.0957852	0.0925587	0.117918	0.126185	0.140874	0	0		0.635329	0.613928	0.782134	-1.57399	-1.62886	-1.27855
A0A024R7T3	Heterogeneous nuclear ribonucleoprotein F, isoform CRA_a	HNRPF	0	18.3133	5	45.6	5.58	0.22612	0.144033	0.206537	0.182468	0.20946	0.255269	0	0		0.636977	0.913397	0.806955	-1.56992	-1.09481	-1.23923
P62277	40S ribosomal protein S13	RPS13	0	22.5166	4	17.2	10.54	0.0754152	0.0482259	0.0909709	0.0754918	0.0540868	0.0590049	0	0		0.639472	1.20627	1.00102	-1.56379	1.20627	1.00102
Q5JR94	40S ribosomal protein S8	RPS8	0	28.8462	5	24.2	10.32	0.202963	0.134804	0.246908	0.172282	0.180307	0.190415	0.244327	0.225542		0.664182	1.21652	0.848835	-1.50561	1.21652	-1.17808
Q6IPI1	60S ribosomal protein L29	RPL29	0	14.2857	2	17.9	11.66	0.0985667	0.0675634	0.0922198	0.0856432	0.0667876	0.105367	0.363768	0.422767		0.685458	0.935608	0.868885	-1.45888	-1.06882	-1.1509
Q5EC54	Heterogeneous nuclear ribonucleoprotein K transcript variant	HNRPK	0	23.9224	8	51	5.33	0.121723	0.0859553	0.128738	0.128345	0.0896422	0.112918	0.342696	0.158268		0.706153	1.05762	1.0544	-1.41612	1.05762	1.0544
P14649	Myosin light chain 6B	MYL6B	0	28.3654	5	22.8	5.73	0.272549	0.192559	0.26099	0.225685	0.22223	0.31415	0.287719	0.316989		0.706514	0.95759	0.828054	-1.4154	-1.04429	-1.20765
G8JLB6	Heterogeneous nuclear ribonucleoprotein H	HNRNPH1	0	15.0424	5	51.2	6.8	0.243462	0.172577	0.207839	0.160379	0.174424	0.241273	0.333119	0.277384		0.708847	0.853683	0.658746	-1.41074	-1.1714	-1.51804
A3R0T7	Liver histone H1e		0	30.137	10	21.9	11.03	0.214647	0.154185	0.219994	0.25796	0.15487	0.13141	0.805809	1.01539		0.71832	1.02491	1.20179	-1.39214	1.02491	1.20179
Q16630	Cleavage and polyadenylation specificity factor subunit 6	CPSF6	0	16.3339	7	59.2	7.15	0.174093	0.125297	0.144122	0.106736	0.206193	0.0983252	0.454963	0.56735		0.719714	0.827844	0.613101	-1.38944	-1.20796	-1.63105
B7Z6Z4	Myosin light polypeptide 6	MYL6	0	36.9748	9	26.7	5.08	0.469732	0.345843	0.483196	0.528098	0.397122	0.523058	0.38776	0.461724		0.736255	1.02866	1.12425	-1.35823	1.02866	1.12425
P62269	40S ribosomal protein S18	RPS18	0	44.0789	9	17.7	10.99	0.545027	0.404478	0.532261	0.441149	0.498945	0.425591	1.43592	1.87556		0.742125	0.976578	0.809408	-1.34748	-1.02398	-1.23547
A8K4W0	40S ribosomal protein S3a	RPS3A	0	40.1515	12	29.9	9.73	0.284182	0.212198	0.297169	0.269863	0.245517	0.258288	0.2557	0.197721		0.746695	1.0457	0.949611	-1.33923	1.0457	-1.05306
A0A0S2Z428	HCG2039812, isoform CRA_b (Fragment)	KRT6A	0	46.2766	24	60	8	0.423575	0.336592	1.24284	0.31411	0.408835	0.521232	0.949545	1.40714		0.794646	2.93417	0.741569	-1.25842	2.93417	-1.34849
Q59F66	DEAD box polypeptide 17 isoform p82 variant (Fragment)		0	17.7748	11	81	7.93	0.266835	0.21252	0.284728	0.2902	0.138921	0.196898	0.275616	0.22524		0.796448	1.06706	1.08757	-1.25558	1.06706	1.08757
A8K0T9	cDNA FLJ75422, highly similar to Homo sapiens capping protein (actin filament) muscle Z-line, alpha 1, mRNA		0	34.965	6	32.9	5.69	0.168258	0.134181	0.0525262	0.182984	0.202624	0.213317	0	0		0.797473	0.312177	1.08752	-1.25396	-3.20331	1.08752
P05787	Keratin, type II cytoskeletal 8	KRT8	0	40.7867	19	53.7	5.59	0.191163	0.152961	0.104714	0.0866737	0.143677	0.145283	0.440974	0.144886		0.800158	0.54777	0.453402	-1.24975	-1.82558	-2.20555
Q86Y46	Keratin, type II cytoskeletal 73	KRT73	0	9.25926	6	58.9	7.23	0.179852	0.144334	0.168485	0.140797	0.185565	0.2274	0.439818	0.642869		0.802515	0.936798	0.782853	-1.24608	-1.06747	-1.27738
B4DWU6	cDNA FLJ51361, highly similar to Keratin, type II cytoskeletal 6A		0	44.8077	21	55.8	6.48	0.406182	0.327063	1.17941	0.31411	0.384975	0.497138	0.749675	1.19399		0.805212	2.90365	0.773323	-1.24191	2.90365	-1.29312
Q2NL82	Pre-rRNA-processing protein TSR1 homolog	TSR1	0	13.6816	9	91.8	7.42	0.127508	0.105014	0.104714	0.0546389	0.0837942	0.130181	0.0893085	0.212355		0.823588	0.821233	0.428515	-1.2142	-1.21768	-2.33364
P03243	E1B 55 kDa protein		0	13.1048	6	55	7.3	0.0580073	0.0482042	0.104714	0.0973404	0.0419058	0	0	0		0.831001	1.80518	1.67807	-1.20337	1.80518	1.67807
Q96T67	TOB3		0	13.1488	6	65.1	9.33	0.081164	0.067864	0.0775137	0.0747363	0.0715959	0.0603586	0	0		0.836135	0.955027	0.920806	-1.19598	-1.04709	-1.086
P13647	Keratin, type II cytoskeletal 5	KRT5	0	43.3898	28	62.3	7.74	0.458441	0.384775	1.05226	0.37866	0.401965	0.392281	0.629808	0.987225		0.839312	2.2953	0.825974	-1.19145	2.2953	-1.21069
Q562R1	Beta-actin-like protein 2	ACTBL2	0	36.9681	13	42	5.59	3.69352	3.10687	2.04086	2.68723	4.56168	4.31233	0.749766	0.358687		0.841168	0.55255	0.727551	-1.18882	-1.80979	-1.37447
Q562M5	Actin-like protein (Fragment)	ACT	0	57.2816	3	11.6	6.35	0.603241	0.520267	0.274786	0.471913	0.674928	0.690298	0	0		0.862454	0.455516	0.782297	-1.15948	-2.19531	-1.27829
V9HW26	ATP synthase subunit alpha	HEL-S-123m	0	33.6347	15	59.7	9.13	0.197083	0.172255	0.245945	0.202566	0.214285	0.231213	0.715984	0.856367		0.87402	1.24792	1.02782	-1.14414	1.24792	1.02782
P68133	Actin, alpha skeletal muscle	ACTA1	0	56.2334	20	42	5.39	5.318	4.68338	3.20101	4.09155	6.53275	5.70016	2.27387	1.86187		0.880666	0.601919	0.769377	-1.1355	-1.66135	-1.29975
Q53F64	Heterogeneous nuclear ribonucleoprotein AB isoform a variant (Fragment)		0	13.8554	4	36	7.42	0.0870387	0.0770709	0.104999	0.0759722	0.102343	0.0958657	0.300035	0.223642		0.885478	1.20635	0.872856	-1.12933	1.20635	-1.14566
P68032	Actin, alpha cardiac muscle 1	ACTC1	0	56.2334	20	42	5.39	5.36432	4.78872	3.17511	4.15812	6.54702	5.72111	2.27387	1.86187		0.892698	0.591894	0.775144	-1.1202	-1.68949	-1.29008
Q04695	Keratin, type I cytoskeletal 17	KRT17	0	36.5741	16	48.1	5.02	0.278453	0.249626	0.797105	0.183979	0.204651	0.302103	0.364285	0.383507		0.896475	2.86262	0.660719	-1.11548	2.86262	-1.5135
A0A024R608	Ribosomal protein, large, P1, isoform CRA_a	RPLP1	0	28.9474	2	11.5	4.32	0.0753497	0.0678858	0.0515628	0.0658208	0.0535843	0	0	0		0.900943	0.684314	0.873538	-1.10995	-1.46132	-1.14477
Q0IIN1	Keratin 77	KRT77	0	10.7266	6	61.8	5.85	0.394116	0.356252	0.59853	0.35427	0.305487	0.354191	1.0668	1.26815		0.903927	1.51866	0.898898	-1.10628	1.51866	-1.11247
P35908	Keratin, type II cytoskeletal 2 epidermal	KRT2	0	59.3114	33	65.4	8	1.04349	0.951721	2.13477	0.979158	0.901447	1.15585	3.22706	3.8502		0.912057	2.0458	0.938351	-1.09642	2.0458	-1.0657
Q53G49	Ribosomal protein L19 (Fragment)		0	18.8776	4	23.5	11.4	0.0522484	0.0482259	0.0784771	0.0647903	0.0365777	0.0578127	0.0782393	0.131699		0.923012	1.502	1.24004	-1.08341	1.502	1.24004
P49411	Elongation factor Tu, mitochondrial	TUFM	0	28.3186	10	49.5	7.61	0.145046	0.135148	0.090293	0.206103	0.129971	0.154151	0	0		0.931763	0.622513	1.42095	-1.07323	-1.60639	1.42095
Q13707	ACTA2 protein (Fragment)	ACTA2	0	39.697	12	36.8	5.35	4.31475	4.03973	2.75943	3.60766	5.21495	4.55894	2.20804	1.86187		0.93626	0.639534	0.836122	-1.06808	-1.56364	-1.196
P27348	14-3-3 protein theta	YWHAQ	0	17.551	4	27.7	4.78	0.0405645	0.038396	0.06502	0.0861584	0.0477364	0.0463618	0.033175	0		0.946542	1.60288	2.12399	-1.05648	1.60288	2.12399
P13645	Keratin, type I cytoskeletal 10	KRT10	0	59.0753	32	58.8	5.21	1.95974	1.85749	3.2178	1.97711	1.59026	1.52264	3.40449	5.04138		0.947827	1.64196	1.00886	-1.05504	1.64196	1.00886
H6VRG1	Keratin 1	KRT1	0	64.4961	42	66.1	8.12	3.04989	2.89839	5.76882	3.3329	3.17289	3.28448	8.58212	11.8172		0.950328	1.89149	1.0928	-1.05227	1.89149	1.0928
P10809	60 kDa heat shock protein, mitochondrial	HSPD1	0	29.3194	13	61	5.87	0.0985114	0.0954845	0.245606	0.127314	0.084834	0.0743928	0.342819	0.450436		0.969274	2.49317	1.29238	-1.0317	2.49317	1.29238
P42766	60S ribosomal protein L35	RPL35	0	30.0813	4	14.5	11.05	0.0985667	0.0961511	0.117207	0.118158	0.180307	0.0901778	0.441491	0.503422		0.975493	1.18912	1.19877	-1.02512	1.18912	1.19877
P02533	Keratin, type I cytoskeletal 14	KRT14	0	53.6017	22	51.5	5.16	0.70747	0.692779	1.40717	0.614977	0.707954	0.75216	1.54022	1.91745		0.979234	1.98901	0.869262	-1.02121	1.98901	-1.1504
J3QQ67	60S ribosomal protein L18 (Fragment)	RPL18	0	25.7895	5	21.8	11.72	0.0927976	0.0964518	0.14157	0.0863987	0.0779289	0.11411	0.329864	0.274686		1.03938	1.52558	0.931044	1.04	1.52558	-1.07406
B4DI54	cDNA FLJ56386, highly similar to Heat shock 70 kDa protein 1L		0	24.3972	12	77.5	8.06	0.498557	0.519945	0.998878	0.838876	0.486764	0.428981	1.53529	0.989966		1.0429	2.00354	1.68261	1.04	2.00354	1.68261
B2R4P2	cDNA, FLJ92164, highly similar to Homo sapiens peroxiredoxin 1 (PRDX1), mRNA		0	31.6583	6	22.2	8.38	0.0811188	0.0862994	0.208803	0.107527	0.0477538	0.0520873	0.311194	0.239873		1.06387	2.57404	1.32555	1.06	2.57404	1.32555
A2A3R6	40S ribosomal protein S6	RPS6	0	30.1205	6	28.7	10.84	0.127442	0.134482	0.233505	0.216495	0.0609397	0.106596	0	0		1.05524	1.83224	1.69877	1.06	1.83224	1.69877
Q53Z07	NPC-A-16	RPL9	0	28.6458	5	21.9	9.95	0.0985718	0.105659	0.0525262	0.0856432	0.149577	0.113004	0	0		1.0719	0.532873	0.868841	1.07	-1.87662	-1.15096
Q9BYX7	Putative beta-actin-like protein 3	POTEKP	0	23.4667	7	42	6.33	1.87892	2.02949	1.32585	1.66382	2.23048	2.40295	0.561785	0.305399		1.08014	0.705646	0.885521	1.08	-1.41714	-1.12928
B2R6X5	cDNA, FLJ93166, highly similar to Homo sapiens heat shock 70kDa protein 6 (HSP70B') (HSPA6), mRNA		0	15.5521	8	70.9	6.24	0.353738	0.385463	0.765427	0.645706	0.32556	0.299558	0.963747	0.647661		1.08969	2.16382	1.82538	1.09	2.16382	1.82538
P60174	Triosephosphate isomerase	TPI1	0	24.1259	5	30.8	5.92	0.03474	0.0383742	0.155652	0.0754918	0	0	0.122057	0.0661733		1.10461	4.48048	2.17305	1.1	4.48048	2.17305
Q6ZN40	Tropomyosin 1 (Alpha), isoform CRA_f	TPM1	0	15.6442	5	37.4	4.72	0.0869381	0.0957852	0.0791016	0.075732	0.0540868	0.0881905	0	0		1.10176	0.90986	0.871102	1.1	-1.09907	-1.14797
J3KTA4	Probable ATP-dependent RNA helicase DDX5	DDX5	0	26.7101	15	69	8.85	0.2321	0.261047	0.273484	0.256449	0.114022	0.149183	0.231282	0.159066		1.12472	1.1783	1.10491	1.12	1.1783	1.10491
V9HWE1	Epididymis luminal protein 113	HEL113	0	63.5193	36	53.6	5.12	1.47293	1.65521	1.03152	0.817577	1.31764	1.12082	4.48674	1.07013		1.12376	0.700319	0.55507	1.12	-1.42792	-1.80158
B4DW52	cDNA FLJ55253, highly similar to Actin, cytoplasmic 1		0	73.7752	22	38.6	5.35	6.56451	7.40908	4.65463	6.00059	8.09358	7.67766	2.96896	2.38992		1.12866	0.70906	0.914095	1.13	-1.41032	-1.09398
B4DE59	cDNA FLJ60424, highly similar to Junction plakoglobin		0	14.3872	8	62.6	5.17	0.133407	0.153497	0.16877	0.108247	0.0848166	0.0767772	0.322353	0.304298		1.15059	1.26507	0.811405	1.15	1.26507	-1.23243
B2R4R9	HCG26477	RPS28	0	46.3768	3	7.8	10.7	0.075405	0.0866219	0.103126	0.107252	0.0906819	0.0704557	0	0		1.14875	1.36762	1.42234	1.15	1.36762	1.42234
P62750	60S ribosomal protein L23a	RPL23A	0	42.9487	8	17.7	10.45	0.133463	0.15354	0.299096	0.247774	0.151102	0.111688	0.176518	0.485745		1.15044	2.24104	1.8565	1.15	2.24104	1.8565
P46781	40S ribosomal protein S9	RPS9	0	39.1753	8	22.6	10.65	0.0985164	0.115166	0.0656444	0.129615	0.0784835	0.0501375	0.155232	0.144735		1.169	0.66633	1.31567	1.17	-1.50076	1.31567
A0A0C4DG17	40S ribosomal protein SA	RPSA	0	21.3333	5	33.3	4.87	0.0986271	0.115467	0.196594	0.107252	0.078986	0.0781309	0.287415	0.303154		1.17074	1.99331	1.08744	1.17	1.99331	1.08744
V9HW22	Epididymis luminal protein 33	HEL-S-72p	0	33.1269	17	70.9	5.52	0.429042	0.500564	0.884507	0.82972	0.420998	0.288703	0.84023	0.581185		1.1667	2.06159	1.93389	1.17	2.06159	1.93389
P22695	Cytochrome b-c1 complex subunit 2, mitochondrial	UQCRC2	0	22.2958	7	48.4	8.63	0.0405645	0.0479252	0.0640566	0.0869139	0.0360405	0.0374944	0	0		1.18146	1.57913	2.14261	1.18	1.57913	2.14261
A0A0D9SF53	ATP-dependent RNA helicase DDX3X	DDX3X	0	22.2374	14	81.4	8.07	0.191425	0.231579	0.285692	0.332937	0.11987	0.163775	0.0992215	0.0919431		1.20976	1.49245	1.73926	1.21	1.49245	1.73926
P05387	60S acidic ribosomal protein P2	RPLP2	0	84.3478	6	11.7	4.54	0.15082	0.183353	0.11851	0.162646	0.102326	0.0990452	0.144802	0.0655257		1.2157	0.785768	1.07841	1.22	-1.27264	1.07841
A0A0G2JIW1	Heat shock 70 kDa protein 1B	HSPA1B	0	47.352	23	70.1	5.66	0.759588	0.925303	1.75176	1.4699	0.79381	0.706556	2.62307	1.66435		1.21816	2.30619	1.93512	1.22	2.30619	1.93512
P55081	Microfibrillar-associated protein 1	MFAP1	0	27.3349	12	51.9	4.98	0.139176	0.173157	0.208178	0.259196	0.186137	0.104609	0.364925	0.380917		1.24415	1.49579	1.86236	1.24	1.49579	1.86236
P08779	Keratin, type I cytoskeletal 16	KRT16	0	35.518	17	51.2	5.05	0.492884	0.615386	1.23806	0.570764	0.449666	0.49884	1.56275	1.8379		1.24854	2.51186	1.15801	1.25	2.51186	1.15801
P35527	Keratin, type I cytoskeletal 9	KRT9	0	58.9085	29	62	5.24	1.30488	1.65583	2.96568	2.00057	1.64336	1.81601	3.54422	5.93582		1.26895	2.27276	1.53314	1.27	2.27276	1.53314
P67936	Tropomyosin alpha-4 chain	TPM4	0	32.2581	10	28.5	4.69	0.127553	0.163026	0.118171	0.140282	0.0779463	0.149903	0	0		1.27811	0.926445	1.0998	1.28	-1.0794	1.0998
P23246	Splicing factor, proline- and glutamine-rich	SFPQ	0	4.80905	3	76.1	9.44	0.0579621	0.0773716	0.0640566	0.0645501	0.0540868	0	0.1327	0.0936917		1.33486	1.10515	1.11366	1.33	1.10515	1.11366
K7ELC2	40S ribosomal protein S15	RPS15	0	29.6053	4	17.7	10.39	0.0637764	0.0866219	0.117546	0.150433	0.0667876	0.0368608	0	0		1.35821	1.8431	2.35876	1.36	1.8431	2.35876
A0A0A6YYL6	Protein RPL17-C18orf32	RPL17-C18orf32	0	24.5614	5	26.4	10.1	0.162444	0.221104	0.247247	0.182228	0.125683	0.159876	0	0		1.36111	1.52205	1.12179	1.36	1.52205	1.12179
E7EVS6	Actin, cytoplasmic 1 (Fragment)	ACTB	0	54.6012	8	17.9	5.5	2.22686	3.02952	2.14393	2.35991	2.70913	2.0051	0.992666	1.05564		1.36044	0.962758	1.05975	1.36	-1.03868	1.05975
A0A024RBF6	HCG26523, isoform CRA_a	hCG_26523	0	12.4138	3	17.3	10.2	0.0347954	0.0479035	0.0390691	0.0637946	0.0540694	0	0.0668666	0.0532883		1.37672	1.12282	1.83342	1.38	1.12282	1.83342
P68366	Tubulin alpha-4A chain	TUBA4A	0	38.6161	13	49.9	5.06	0.493337	0.700439	0.674741	0.935255	0.382809	0.463333	0.222008	0.170958		1.4198	1.36771	1.89577	1.42	1.36771	1.89577
Q9BUF5	Tubulin beta-6 chain	TUBB6	0	28.2511	11	49.8	4.88	0.353919	0.509771	0.482911	0.623377	0.294363	0.21785	0.519124	0.408133		1.44036	1.36447	1.76136	1.44	1.36447	1.76136
Q59G24	Activated RNA polymerase II transcription cofactor 4 variant (Fragment)		0	40.2985	6	15.1	9.38	0.0464341	0.0672409	0.129416	0.0650653	0.0477364	0.0260436	0	0		1.44809	2.78708	1.40124	1.45	2.78708	1.40124
P62249	40S ribosomal protein S16	RPS16	0	57.5342	9	16.4	10.21	0.115969	0.1732	0.273484	0.194131	0.108174	0.0888241	0.109955	0.171455		1.4935	2.35824	1.67398	1.49	2.35824	1.67398
O43175	D-3-phosphoglycerate dehydrogenase	PHGDH	0	13.5084	6	56.6	6.71	0.0695958	0.105938	0.115619	0.162886	0	0	0.155019	0		1.52218	1.6613	2.34046	1.52	1.6613	2.34046
P67809	Nuclease-sensitive element-binding protein 1	YBX1	0	38.2716	10	35.9	9.88	0.139026	0.211853	0.208464	0.117918	0.136841	0.144053	0.497411	0.213002		1.52385	1.49946	0.848177	1.52	1.49946	-1.179
A0A0S2Z4G4	Tropomyosin 3 isoform 1 (Fragment)	TPM3	0	39.1129	11	29	4.78	0.214541	0.336549	0.313177	0.355816	0.156412	0.224693	0	0		1.56869	1.45975	1.6585	1.57	1.45975	1.6585
B7Z596	Tropomyosin alpha-1 chain	TPM1	0	22.1818	6	31.7	4.89	0.121733	0.192237	0.196309	0.216254	0.0896422	0.135148	0	0		1.57916	1.61261	1.77646	1.58	1.61261	1.77646
P46776	60S ribosomal protein L27a	RPL27A	0	28.3784	4	16.6	11	0.0927524	0.153841	0.246908	0.171802	0.132518	0.0710518	0.34072	0.502472		1.65862	2.66201	1.85226	1.66	2.66201	1.85226
Q9BVA1	Tubulin beta-2B chain	TUBB2B	0	49.4382	17	49.9	4.89	0.806324	1.34753	1.36895	1.63385	0.701101	0.586547	1.19245	1.09589		1.6712	1.69777	2.02629	1.67	1.69777	2.02629
F5H5D3	Tubulin alpha chain	TUBA1C	0	39.8844	16	57.7	5.07	0.76588	1.28883	1.50831	1.57918	0.779515	0.767982	1.48421	1.43397		1.68281	1.96938	2.06191	1.68	1.96938	2.06191
P04350	Tubulin beta-4A chain	TUBB4A	0	49.3243	16	49.6	4.88	0.643609	1.12552	0.924486	1.292	0.574864	0.500393	1.15018	1.01543		1.74877	1.43641	2.00743	1.75	1.43641	2.00743
E9PAV3	Nascent polypeptide-associated complex subunit alpha, muscle-specific form	NACA	0	3.36862	5	205.3	9.58	0.156634	0.278794	0.36474	0.291471	0.18508	0.146003	0.308488	0.197225		1.7799	2.32861	1.86084	1.78	2.32861	1.86084
P07437	Tubulin beta chain	TUBB	0	58.7838	19	49.6	4.89	1.06154	1.88614	1.89002	2.2138	0.900909	0.863923	2.00087	1.80718		1.7768	1.78045	2.08546	1.78	1.78045	2.08546
P62701	40S ribosomal protein S4, X isoform	RPS4X	0	35.3612	9	29.6	10.15	0.295755	0.528829	0.663211	0.603005	0.276247	0.355544	0.285956	0.368831		1.78806	2.24243	2.03886	1.79	2.24243	2.03886
B3KML9	cDNA FLJ11352 fis, clone HEMBA1000020, highly similar to Tubulin beta-2C chain		0	46.8514	16	44.6	4.93	0.806067	1.44432	1.38139	1.73294	0.785398	0.667906	1.48141	1.29297		1.79182	1.71374	2.14987	1.79	1.71374	2.14987
P0CG38	POTE ankyrin domain family member I	POTEI	0	9.5814	8	121.2	6.21	0.823782	1.51819	0.950491	1.16879	0.980649	0.752359	0.805809	0.936829		1.84295	1.15381	1.41881	1.84	1.15381	1.41881
A0A0U1RRH7	Histone H2A		0	16.4706	2	18.5	11.52	0.0464239	0.0865784	0.0515628	0.0856432	0.0652629	0.0710518	0.122057	0.209462		1.86495	1.1107	1.84481	1.86	1.1107	1.84481
Q71U36	Tubulin alpha-1A chain	TUBA1A	0	50.5543	17	50.1	5.06	0.701893	1.3272	1.53392	1.65467	0.725948	0.647427	1.48421	1.4079		1.89089	2.18541	2.35744	1.89	2.18541	2.35744
Q8IWP6	Tubulin beta chain		0	58.6517	19	49.7	4.92	0.794539	1.52109	1.407	1.79749	0.768894	0.646396	1.60274	1.49019		1.91444	1.77084	2.26231	1.91	1.77084	2.26231
V9GZ17	Tubulin alpha-8 chain (Fragment)	TUBA8	0	25.8182	6	31.1	8.29	0.185721	0.364814	0.361225	0.45034	0.150045	0.129461	0.144073	0.118965		1.96431	1.94499	2.42482	1.96	1.94499	2.42482
P21333	Filamin-A	FLNA	0	26.445	50	280.6	6.06	0.730687	1.44119	0.19506	0.545929	0.853225	0.665919	0.417622	0.370622		1.97237	0.266954	0.747144	1.97	-3.74596	-1.33843
P16989	Y-box-binding protein 3	YBX3	0	13.7097	4	40.1	9.77	0.0636708	0.134482	0.143444	0.0538834	0.0540694	0.0526834	0.187374	0		2.11214	2.2529	0.846281	2.11	2.2529	-1.18164
P62851	40S ribosomal protein S25	RPS25	0	35.2	5	13.7	10.11	0.162343	0.3464	0.402507	0.375603	0.191448	0.149021	0.619165	0.830597		2.13376	2.47936	2.31364	2.13	2.47936	2.31364
P14625	Endoplasmin	HSP90B1	0	11.7061	8	92.4	4.84	0.0347903	0.0768137	0.183476	0.0973404	0	0.0343149	0.252994	0.211707		2.20791	5.27377	2.79792	2.21	5.27377	2.79792
P08708	40S ribosomal protein S17	RPS17	0	59.2593	8	15.5	9.85	0.168163	0.374322	0.404487	0.442455	0.229533	0.185447	0.033175	0		2.22595	2.40533	2.63111	2.23	2.40533	2.63111
P62913	60S ribosomal protein L11	RPL11	0	25.8427	5	20.2	9.6	0.15082	0.347045	0.403131	0.310298	0.149525	0.177176	0.377454	0.502926		2.30105	2.67293	2.0574	2.3	2.67293	2.0574
Q13435	Splicing factor 3B subunit 2	SF3B2	0	6.36872	5	100.2	5.67	0.0290263	0.0675416	0.116244	0.0863987	0.0360579	0	0.0549773	0		2.32691	4.00478	2.97657	2.33	4.00478	2.97657
P62081	40S ribosomal protein S7	RPS7	0	27.3196	7	22.1	10.1	0.0522032	0.125297	0.169395	0.150709	0.0657653	0.0724055	0.19896	0.147779		2.40017	3.24491	2.88696	2.4	3.24491	2.88696
P18077	60S ribosomal protein L35a	RPL35A	0	10.9091	1	12.5	11.06	0.0231617	0.0577334	0.0515628	0.0541236	0.0238769	0.0329612	0	0		2.49262	2.22621	2.33677	2.49	2.22621	2.33677
F8W7C6	60S ribosomal protein L10	RPL10	0	26.3804	3	18.6	9.95	0.0289257	0.0767702	0.13004	0.108007	0.0180289	0	0	0		2.65405	4.49565	3.73394	2.65	4.49565	3.73394
Q562L9	Actin-like protein (Fragment)	ACT	0	53.3981	3	11.5	6.52	0.452224	1.22163	0.778153	0.82062	0.474618	0.476696	0.121024	0.118814		2.70138	1.72072	1.81463	2.7	1.72072	1.81463
Q0KKI6	Immunoblobulin light chain (Fragment)		0	9.58904	2	24	8.06	0.0406147	0.115445	0.103126	0.106736	0.0297075	0	0.12154	0		2.84244	2.53912	2.62802	2.84	2.53912	2.62802
A6NHL2	Tubulin alpha chain-like 3	TUBAL3	0	8.29596	4	49.9	6.05	0.0406097	0.115768	0.0906319	0.1291	0.0302099	0.0266397	0.0665632	0		2.85074	2.23178	3.17905	2.85	2.23178	3.17905
F8W0W8	Serine/threonine-protein phosphatase	PPP1CC	0	20.7831	5	38.2	6.83	0.0811792	0.240742	0.129077	0.258716	0.108156	0.069226	0	0		2.96556	1.59002	3.18697	2.97	1.59002	3.18697
P08238	Heat shock protein HSP 90-beta	HSP90AB1	0	13.2597	8	83.2	5.03	0.0755056	0.230245	0.368647	0.355575	0.0594149	0.0386867	0.418656	0.394601		3.04938	4.88238	4.70926	3.05	4.88238	4.70926
D3DUK1	Breast cancer anti-estrogen resistance 1, isoform CRA_a	BCAR1	0	16.7793	10	95.1	5.74	0.052193	0.16337	0.311304	0.313114	0.114524	0.0526834	0	0		3.13012	5.96447	5.99916	3.13	5.96447	5.99916
P23396	40S ribosomal protein S3	RPS3	0	44.4444	9	26.7	9.66	0.0928027	0.299743	0.285638	0.322235	0.0487587	0.0901778	0.0767796	0.105282		3.2299	3.07791	3.47226	3.23	3.07791	3.47226
Q562V5	Actin-like protein (Fragment)	ACT	0	46.6019	2	11.4	6.35	0.36523	1.18293	0.765034	0.7891	0.423814	0.394951	0.121024	0.118814		3.23887	2.09466	2.16055	3.24	2.09466	2.16055
Q562Z4	Actin-like protein (Fragment)	ACT	0	54.3689	4	11.5	7.58	0.353647	1.17371	0.765034	0.800282	0.364902	0.31877	0.121024	0.118814		3.31886	2.16327	2.26294	3.32	2.16327	2.26294
H0YH81	ATP synthase subunit beta (Fragment)	ATP5B	0	28.7293	7	38.2	5.55	0.0462681	0.154207	0.193758	0.137775	0.0180289	0	0.0668666	0.118663		3.3329	4.18772	2.97776	3.33	4.18772	2.97776
P62263	40S ribosomal protein S14	RPS14	0	31.1258	5	16.3	10.05	0.133206	0.452338	0.677346	0.526827	0.09601	0.133956	0.575134	0.647013		3.39577	5.08495	3.95497	3.4	5.08495	3.95497
B3KXM2	Serine/threonine-protein phosphatase		0	16.707	5	45.8	7.4	0.0637262	0.240742	0.0896685	0.215774	0.0901273	0.057179	0	0		3.77776	1.40709	3.38595	3.78	1.40709	3.38595
P62280	40S ribosomal protein S11	RPS11	0	13.2911	3	18.4	10.3	0.0348456	0.134504	0.19597	0.16189	0.0535843	0.0323651	0	0		3.85998	5.62394	4.64593	3.86	5.62394	4.64593
D1CS55	Toll-like receptor 4	TLR4	0	20.5006	13	95.7	6.3	0.168168	0.66359	0.63924	0.656167	0.16226	0.184094	0.353126	0.606005		3.94601	3.80121	3.90187	3.95	3.80121	3.90187
A8K9C4	Elongation factor 1-alpha		0	13.8528	5	50.2	9.01	0.046429	0.192904	0.234129	0.171561	0.0535843	0	0.176305	0.105929		4.15481	5.04273	3.69513	4.15	5.04273	3.69513
A0A024R1Q8	Ribosomal protein L23, isoform CRA_b	RPL23	0	52.8571	6	14.9	10.51	0.2203	0.962	1.26458	0.859969	0.174909	0.175226	0.244327	0.182095		4.36677	5.74025	3.90362	4.37	5.74025	3.90362
V9HW04	Serine/threonine-protein phosphatase	HEL-S-80p	0	25.3823	6	37.2	6.19	0.0694902	0.337172	0.234129	0.34563	0.114507	0.0755475	0	0		4.85208	3.36924	4.97379	4.85	3.36924	4.97379
Q92614	Unconventional myosin-XVIIIa	MYO18A	0	15.3359	24	233	6.3	0.104336	0.626183	0.0521873	0.226991	0.162278	0.110496	0	0		6.00161	0.500186	2.17558	6	-1.99926	2.17558
Q9BZL4	Protein phosphatase 1 regulatory subunit 12C	PPP1R12C	0	5.24297	3	84.8	5.57	0.0231617	0.144634	0.0922198	0.0970653	0.0243793	0	0	0		6.24454	3.98156	4.19077	6.24	3.98156	4.19077
A8K517	Ribosomal protein S23, isoform CRA_a	RPS23	0	23.7762	3	15.8	10.49	0.0231617	0.154486	0.236341	0.19341	0	0.0406364	0	0		6.66989	10.204	8.35042	6.67	10.204	8.35042
B2RMV2	CYTSA protein	CYTSA	0	13.6079	13	124.5	5.76	0.0289811	0.298131	0.40256	0.397246	0	0.0203182	0	0		10.2871	13.8905	13.7071	10.29	13.8905	13.7071
Q13813	Spectrin alpha chain, non-erythrocytic 1	SPTAN1	0	22.2492	44	284.4	5.35	0.0986221	1.09655	0.303003	0.614772	0.102845	0.157454	0	0		11.1187	3.07236	6.23361	11.12	3.07236	6.23361
B2RAH5	Protein phosphatase 1 regulatory subunit		0	23.3981	21	115.3	5.43	0.092853	1.19362	0.79268	1.00056	0.0482562	0.0838188	0	0		12.855	8.53694	10.7758	12.85	8.53694	10.7758
P27824	Calnexin	CANX	0	14.6959	7	67.5	4.6	0.0289811	0.374622	0.427833	0.355025	0.0657827	0.0457657	0	0.0927418		12.9265	14.7625	12.2503	12.93	14.7625	12.2503
A0A087WUZ3	Spectrin beta chain	SPTBN1	0	22.9079	41	274.7	5.57	0.0289811	1.05899	0.273823	0.538249	0.0726356	0.0483116	0	0		36.5408	9.44833	18.5724	36.54	9.44833	18.5724
P55060	Exportin-2	CSE1L	0	2.78064	2	110.3	5.77	0	0.0288667	0.06502	0.0546389	0	0	0	0
Q53GB0	Mitochondrial import receptor Tom22 variant (Fragment)		0	8.4507	1	15.5	4.34	0	0.0288667	0	0	0	0	0	0
A0A024RAC0	Leucine zipper protein 1, isoform CRA_a	LUZP1	0	6.41264	5	120.2	8.63	0	0.0288667	0	0	0	0	0	0
O43795	Unconventional myosin-Ib	MYO1B	0	5.45775	4	131.9	9.38	0	0.0383742	0	0.0658208	0	0	0	0
A0A140VKG2	Testis tissue sperm-binding protein Li 79P		0.002	2.62295	1	70	4.69	0	0.0383742	0	0	0	0	0	0
A0A024R0M6	Translocase of inner mitochondrial membrane 50 homolog (Yeast), isoform CRA_b	TIMM50	0	5.26316	2	50.4	9.42	0	0.038396	0.0525262	0.0427015	0	0	0	0
Q5H9N4	Putative uncharacterized protein DKFZp686L20222	DKFZp686L20222	0	11.5512	3	34.8	8.95	0	0.038396	0.0390691	0	0	0	0	0
O14639	Actin-binding LIM protein 1	ABLIM1	0	3.59897	2	87.6	8.59	0	0.038396	0	0	0	0	0	0
P09661	U2 small nuclear ribonucleoprotein A'	SNRPA1	0	12.1569	2	28.4	8.62	0	0.0386966	0.0390691	0	0	0	0	0
P35268	60S ribosomal protein L22	RPL22	0	10.1562	2	14.8	9.19	0	0.0478817	0.0777992	0	0	0	0.06635	0
Q09028	Histone-binding protein RBBP4	RBBP4	0	5.17647	2	47.6	4.89	0	0.0478817	0	0	0	0	0	0
Q00325	Phosphate carrier protein, mitochondrial	SLC25A3	0.001	3.31492	1	40.1	9.38	0	0.0482042	0	0.032275	0	0.0203182	0	0
B3KUJ0	cDNA FLJ39996 fis, clone STOMA2002166, highly similar to Splicing factor 3B subunit 4		0	3.30189	1	44.5	8.24	0	0.0482042	0	0.0533681	0	0.0260436	0	0
P13639	Elongation factor 2	EEF2	0	9.09091	7	95.3	6.83	0	0.0482259	0.0912564	0.0533681	0	0.0374944	0	0
P12004	Proliferating cell nuclear antigen	PCNA	0	12.2605	2	28.8	4.69	0	0.0482259	0.0640566	0.0645501	0	0	0	0
Q15459	Splicing factor 3A subunit 1	SF3A1	0	5.42245	4	88.8	5.22	0	0.0482259	0	0.0754918	0	0	0	0
H7C2N1	Prothymosin alpha (Fragment)	PTMA	0	16.2162	3	15.8	4.23	0	0.0577334	0	0	0	0	0.243901	0.171951
O15020	Spectrin beta chain, non-erythrocytic 2	SPTBN2	0	1.29707	3	271.2	6.11	0	0.0580558	0	0	0	0	0	0
Q14257	Reticulocalbin-2	RCN2	0	20.8202	4	36.9	4.4	0	0.0767484	0	0.0650653	0	0	0	0
E7EMB3	Calmodulin	CALM2	0	28.0612	3	21.7	4.56	0	0.0869008	0.0765503	0.193135	0	0	0	0
H7BY58	Protein-L-isoaspartate O-methyltransferase	PCMT1	0	18.5315	4	30.3	6.73	0	0.0960641	0.0909174	0.12886	0	0	0	0
P60866	40S ribosomal protein S20	RPS20	0	22.6891	3	13.4	9.94	0	0.0964083	0.0915953	0.0968251	0	0	0	0
Q8WWI1	LIM domain only protein 7	LMO7	0	5.05051	6	192.6	8.09	0	0.105293	0.0909709	0.0653056	0	0	0	0
P19474	E3 ubiquitin-protein ligase TRIM21	TRIM21	0	12.8421	4	54.1	6.38	0	0.105336	0.064681	0.139527	0	0	0	0
O43707	Alpha-actinin-4	ACTN4	0	7.24479	5	104.8	5.44	0	0.134783	0	0	0	0	0	0
Q96I25	Splicing factor 45	RBM17	0	19.202	6	44.9	5.97	0	0.153819	0.208803	0.151704	0	0	0	0
A0A1B0GTL5	Rab11 family-interacting protein 5	RAB11FIP5	0	19.4864	15	138.3	5.21	0	0.182451	0.273484	0.312324	0	0	0	0
Q96IZ0	PRKC apoptosis WT1 regulator protein	PAWR	0	30.8824	6	36.5	5.41	0	0.250271	0.219708	0.246538	0	0	0	0
H0Y2S9	Myosin phosphatase Rho-interacting protein (Fragment)	MPRIP	0	10.3679	14	203.4	5.22	0	1.09657	0.933805	0.828004	0	0.0260436	0	0
Q9P0K7	Ankycorbin	RAI14	0	36.9388	29	110	6.21	0	1.51892	1.27973	1.27018	0	0	0	0
B9EGI2	Myosin phosphatase Rho interacting protein	MPRIP	0	34.0405	26	118	6.39	0	1.53972	1.50769	1.17085	0	0.0260436	0	0
P04279	Semenogelin-1	SEMG1	0	7.79221	3	52.1	9.29	0	0	0	0	0	0	0	0.0396047
C9IZQ1	Translocon-associated protein subunit alpha	SSR1	0	8.72483	2	33.9	4.69	0	0	0	0	0	0	0	0.0524896
M0QYS1	60S ribosomal protein L13a (Fragment)	RPL13A	0	10.4762	2	24.2	10.86	0	0	0	0	0	0	0.0443344	0.0532883
P00338	L-lactate dehydrogenase A chain	LDHA	0	6.62651	2	36.7	8.27	0	0	0.0515628	0.043457	0	0.0203182	0.0997381	0.0663244
Q16629	Serine/arginine-rich splicing factor 7	SRSF7	0.001	5.88235	1	27.4	11.82	0	0	0	0	0	0	0	0.0784107
Q9P0L0	Vesicle-associated membrane protein-associated protein A	VAPA	0	10.4418	2	27.9	8.62	0	0	0	0	0	0	0	0.0930442
A8K401	Prohibitin, isoform CRA_a	PHB	0	15.4412	3	29.8	5.76	0	0	0	0	0	0	0.0764761	0.104979
B2RB23	cDNA, FLJ95265, highly similar to Homo sapiens acetyl-Coenzyme A acyltransferase 2 (mitochondrial 3-oxoacyl-Coenzyme A thiolase) (ACAA2), nuclear gene encoding mitochondrial protein, mRNA		0	3.27456	1	42	8.25	0	0	0	0	0	0	0.0876356	0.132498
P49006	MARCKS-related protein	MARCKSL1	0	14.359	2	19.5	4.67	0	0	0	0	0	0	0.244327	0.250017
P29966	Myristoylated alanine-rich C-kinase substrate	MARCKS	0	15.0602	3	31.5	4.45	0	0	0.0525262	0	0	0	0.220336	0.302809
A0A0S2Z471	Creatine kinase brain isoform 2 (Fragment)	CKB	0	19.5062	5	44.9	6.11	0	0	0	0	0	0	0.033175	0
Q15254	Prothymosin alpha	PTMA	0	22.2222	2	11.8	3.81	0	0	0	0	0	0	0.033175	0
H9ZYJ2	Thioredoxin	TXN	0	20.9524	2	11.7	4.92	0	0	0.104089	0.0546389	0	0	0.0438178	0
P01833	Polymeric immunoglobulin receptor	PIGR	0.001	2.09424	1	83.2	5.74	0	0	0	0	0	0	0.0445477	0
Q7Z4V5	Hepatoma-derived growth factor-related protein 2	HDGFRP2	0	5.06706	2	74.3	7.49	0	0	0	0	0	0	0.0551905	0
A0A024R1M6	Uncharacterized protein	MGC3731	0.002	6.10329	1	24.6	10.23	0	0	0	0	0	0	0.0658333	0
Q59H77	T-complex protein 1 subunit gamma (Fragment)		0	7.27903	4	63.5	6.43	0	0	0	0	0	0	0.06635	0
P07737	Profilin-1	PFN1	0	31.4286	3	15	8.27	0	0	0	0	0	0	0.12373	0
Q5U077	L-lactate dehydrogenase	LDHB	0	14.3713	4	36.6	6.05	0	0	0.0775137	0	0	0.0203182	0	0
A0A024RAI1	ARP3 actin-related protein 3 homolog (Yeast), isoform CRA_a	ACTR3	0	5.02392	2	47.3	5.88	0	0	0	0	0	0.0203182	0	0
P12532	Creatine kinase U-type, mitochondrial	CKMT1A	0.002	5.03597	1	47	8.34	0	0	0	0	0	0.0203182	0	0
Q9UBS4	DnaJ homolog subfamily B member 11	DNAJB11	0	11.4525	3	40.5	6.18	0	0	0	0	0	0.0203182	0	0
P05198	Eukaryotic translation initiation factor 2 subunit 1	EIF2S1	0	8.57143	2	36.1	5.08	0	0	0	0	0	0.0203182	0	0
P30419	Glycylpeptide N-tetradecanoyltransferase 1	NMT1	0.005	2.62097	1	56.8	7.8	0	0	0	0	0	0.0203182	0	0
A0A024R203	Proteasome (Prosome, macropain) activator subunit 3 (PA28 gamma Ki), isoform CRA_a	PSME3	0	11.3208	2	30.9	6.71	0	0	0	0	0	0.0203182	0	0
O43290	U4/U6.U5 tri-snRNP-associated protein 1	SART1	0	4	2	90.2	6.13	0	0	0	0	0	0.0203182	0	0
C9J6P4	Zinc finger CCCH-type antiviral protein 1	ZC3HAV1	0	1.46484	1	114	8.56	0	0	0	0	0	0.0203182	0	0
Q14240	Eukaryotic initiation factor 4A-II	EIF4A2	0	6.63391	2	46.4	5.48	0	0	0	0.032275	0	0	0	0
Q9HCM4	Band 4.1-like protein 5	EPB41L5	0	3.95634	2	81.8	6.58	0	0	0	0.032275	0	0	0	0
P62316	Small nuclear ribonucleoprotein Sm D2	SNRPD2	0	23.7288	2	13.5	9.91	0	0	0	0.0538834	0	0	0	0
A8K6V3	cDNA FLJ78677, highly similar to Homo sapiens splicing factor 3b, subunit 3, 130kDa (SF3B3), mRNA		0.008	1.15037	1	135.5	5.21	0	0	0.0390691	0	0	0	0	0
A0A024R1A3	Testicular secretory protein Li 63	UBE1	0	4.91493	3	117.8	5.76	0	0	0.0390691	0	0	0	0	0
P49458	Signal recognition particle 9 kDa protein	SRP9	0	22.093	2	10.1	7.97	0	0	0.0525262	0	0	0	0	0
B3KY60	cDNA FLJ16777 fis, clone BRHIP2029567, highly similar to Cell division cycle 5-like protein		0	5.23691	3	92.2	8.18	0	0	0	0	0	0	0	0
A8KAP3	cDNA FLJ78483, highly similar to Homo sapiens elongation factor Tu GTP binding domain containing 2 (EFTUD2), mRNA		0	4.83539	3	109.4	5.01	0	0	0	0	0	0	0	0
B4DEQ7	cDNA FLJ50003, highly similar to Homo sapiens leucine-rich repeats and calponin homology (CH) domain containing 3 (LRCH3), mRNA		0	6.35118	4	89.1	6.7	0	0	0	0	0	0	0	0
A8K6U7	cDNA FLJ78252, highly similar to Homo sapiens heterogeneous nuclear ribonucleoprotein U-like 1 (HNRPUL1), transcript variant 1, mRNA		0	2.92056	2	95.6	6.92	0	0	0	0	0	0	0	0
B7Z6M0	Peptidylprolyl isomerase		0	7.25624	2	47.1	4.94	0	0	0	0	0	0	0	0
B2R6E2	cDNA, FLJ92910, highly similar to Homo sapiens programmed cell death 4 (neoplastic transformation inhibitor) (PDCD4), transcript variant 1, mRNA		0	5.97015	2	51.6	5.25	0	0	0	0	0	0	0	0
B7Z2B0	cDNA FLJ53470, highly similar to Calcium/calmodulin-dependent protein kinase type II delta chain (EC 2.7.11.17)		0	2.43902	1	60	7.27	0	0	0	0	0	0	0	0
B2R9Y2	cDNA, FLJ94609		0	4.6595	2	66.3	8.97	0	0	0	0	0	0	0	0
B7Z3K9	Fructose-bisphosphate aldolase		0	5.09978	1	48.4	8.07	0	0	0	0	0	0	0	0
B3KPC7	Actin-related protein 2/3 complex subunit 5		0	8.49673	1	17	6.02	0	0	0	0	0	0	0	0
A0A140VK70	Testis secretory sperm-binding protein Li 197a		0	6.00462	2	48.6	5.95	0	0	0	0	0	0	0	0
E9KL44	Epididymis tissue sperm binding protein Li 14m		0	6.1599	3	82.9	9.04	0	0	0	0	0	0	0	0
Q59F99	Staufen isoform b variant (Fragment)		0	4.90694	2	64.7	9.42	0	0	0	0	0	0	0	0
A8K492	cDNA FLJ76789, highly similar to Homo sapiens methionine-tRNA synthetase (MARS), mRNA		0	2.88889	2	101.1	6.16	0	0	0	0	0	0	0	0
Q59HH7	X-ray repair cross complementing protein 1 variant (Fragment)		0	3.55487	2	71	6.04	0	0	0	0	0	0	0	0
A8K566	cDNA FLJ78246, highly similar to Homo sapiens splicing factor 3a, subunit 3, 60kDa (SF3A3), mRNA		0	2.39521	1	58.8	5.43	0	0	0	0	0	0	0	0
S6B2A1	IgG L chain		0	4.8913	1	20.4	5.52	0	0	0	0	0	0	0	0
B2RDG9	cDNA, FLJ96603, highly similar to Homo sapiens actin-related protein 10 homolog (S. cerevisiae) (ACTR10), mRNA		0.001	4.79616	1	46.2	7.62	0	0	0	0	0	0	0	0
A8K4W2	cDNA FLJ78635, highly similar to Homo sapiens ATP synthase, H+ transporting, mitochondrial F0 complex, subunit b, isoform 1 (ATP5F1), transcript variant 1, mRNA		0.002	4.6875	1	28.9	9.36	0	0	0	0	0	0	0	0
B3KMC9	cDNA FLJ10711 fis, clone NT2RP3000917, highly similar to 5'-3' exoribonuclease 2 (EC 3.1.11.-)		0.002	1.26316	1	108.5	7.47	0	0	0	0	0	0	0	0
B2RDD7	Protein arginine N-methyltransferase 5		0.002	2.98273	2	72.7	6.29	0	0	0	0	0	0	0	0
Q59EG8	Proteasome 26S non-ATPase subunit 2 variant (Fragment)		0.002	1.31435	1	100.5	5.15	0	0	0	0	0	0	0	0
B4DJQ5	cDNA FLJ59211, highly similar to Glucosidase 2 subunit beta		0.002	2.42991	1	60.1	4.42	0	0	0	0	0	0	0	0
B2R823	cDNA, FLJ93703, highly similar to Homo sapiens putatative 28 kDa protein (LOC56902), mRNA		0.002	6.34921	1	27.9	9.73	0	0	0	0	0	0	0	0
A0A140VJX1	Testicular tissue protein Li 198		0.002	3.0445	1	45.2	8.85	0	0	0	0	0	0	0	0
B2RAU5	Sorting nexin		0.002	2.01681	1	66.5	5.66	0	0	0	0	0	0	0	0
B2R7B5	cDNA, FLJ93365, highly similar to Homo sapiens KH domain containing, RNA binding, signal transduction associated 1 (KHDRBS1), mRNA		0.002	2.0316	1	48.2	8.66	0	0	0	0	0	0	0	0
B2R4D5	Actin-related protein 2/3 complex subunit 3		0.002	7.30337	1	20.5	8.59	0	0	0	0	0	0	0	0
A8K489	cDNA FLJ76151, highly similar to Homo sapiens Wilms tumor 1 associated protein (WTAP), transcript variant 1, mRNA		0.002	3.78788	1	44.2	5.25	0	0	0	0	0	0	0	0
B7Z2B5	cDNA FLJ54713, highly similar to Gephyrin		0.002	1.79028	1	84.7	5.73	0	0	0	0	0	0	0	0
Q9H2L7	DC33		0.002	3.92857	1	29.5	11.39	0	0	0	0	0	0	0	0
Q59EC0	Adenosine deaminase, RNA-specific isoform ADAR-a variant (Fragment)		0.003	1.20579	1	137.7	8.48	0	0	0	0	0	0	0	0
Q59GX7	Stearoyl-CoA desaturase variant (Fragment)		0.004	3.55191	1	42.3	9.25	0	0	0	0	0	0	0	0
A0A193CHR3	10E8 heavy chain variable region (Fragment)		0.004	12.2137	1	14.6	4.84	0	0	0	0	0	0	0	0
Q59GW5	Tripartite motif-containing 25 variant (Fragment)		0.007	1.86335	1	72.2	8.06	0	0	0	0	0	0	0	0
A0A125QYY8	IBM-B1 light chain variable region (Fragment)		0.007	11.6071	1	12.2	8.5	0	0	0	0	0	0	0	0
A8K8U1	cDNA FLJ77762, highly similar to Homo sapiens cullin-associated and neddylation-dissociated 1 (CAND1), mRNA		0.008	0.97561	1	136.2	5.83	0	0	0	0	0	0	0	0
E5KT65	DNA-directed RNA polymerase subunit RPABC1		0.002	8.09524	1	24.5	5.95	0	0	0	0	0	0	0	0
F5H423	Uncharacterized protein		0.002	6.66667	1	23.3	8.6	0	0	0	0	0	0	0	0
A6NK06	Cis-aconitate decarboxylase	ACOD1	0.002	3.9501	1	52.6	7.46	0	0	0	0	0	0	0	0
P61160	Actin-related protein 2	ACTR2	0	9.39086	3	44.7	6.74	0	0	0	0	0	0	0	0
Q16186	Proteasomal ubiquitin receptor ADRM1	ADRM1	0.008	3.9312	1	42.1	5.07	0	0	0	0	0	0	0	0
O00116	Alkyldihydroxyacetonephosphate synthase, peroxisomal	AGPS	0	2.58359	1	72.9	7.34	0	0	0	0	0	0	0	0
Q12802	A-kinase anchor protein 13	AKAP13	0.002	0.568788	1	307.4	5.24	0	0	0	0	0	0	0	0
O43823	A-kinase anchor protein 8	AKAP8	0.002	1.87861	1	76.1	5.15	0	0	0	0	0	0	0	0
P51648	Fatty aldehyde dehydrogenase	ALDH3A2	0	8.65979	3	54.8	7.88	0	0	0	0	0	0	0	0
O75179	Ankyrin repeat domain-containing protein 17	ANKRD17	0	0.729927	1	274.1	6.52	0	0	0	0	0	0	0	0
A0A140VJE8	AP complex subunit beta	AP2B1	0.002	1.36698	1	105.6	5.34	0	0	0	0	0	0	0	0
O15085	Rho guanine nucleotide exchange factor 11	ARHGEF11	0	1.97109	2	167.6	5.5	0	0	0	0	0	0	0	0
V9GYM8	Rho guanine nucleotide exchange factor 2	ARHGEF2	0.002	1.4549	1	116	7.37	0	0	0	0	0	0	0	0
Q9H1I8	Activating signal cointegrator 1 complex subunit 2	ASCC2	0	1.5852	1	86.3	5.16	0	0	0	0	0	0	0	0
Q12797	Aspartyl/asparaginyl beta-hydroxylase	ASPH	0	5.67282	2	85.8	5.01	0	0	0	0	0	0	0	0
P05023	Sodium/potassium-transporting ATPase subunit alpha-1	ATP1A1	0	8.3089	6	112.8	5.49	0	0	0	0	0	0	0	0
P30049	ATP synthase subunit delta, mitochondrial	ATP5D	0.008	8.33333	1	17.5	5.49	0	0	0	0	0	0	0	0
P56385	ATP synthase subunit e, mitochondrial	ATP5I	0.002	20.2899	1	7.9	9.35	0	0	0	0	0	0	0	0
Q9UHR4	Brain-specific angiogenesis inhibitor 1-associated protein 2-like protein 1	BAIAP2L1	0.003	2.93542	1	56.8	8.68	0	0	0	0	0	0	0	0
D6RDG3	Transcription factor BTF3 (Fragment)	BTF3	0.005	9.17431	1	11.8	5.9	0	0	0	0	0	0	0	0
O43709	Probable 18S rRNA (guanine-N(7))-methyltransferase	BUD23	0.003	5.69395	1	31.9	8.73	0	0	0	0	0	0	0	0
Q549M8	CLE7	C14orf166	0.002	6.55738	1	28.1	6.65	0	0	0	0	0	0	0	0
Q9H8G2	Caspase activity and apoptosis inhibitor 1	CAAP1	0	4.43213	1	38.3	4.72	0	0	0	0	0	0	0	0
Q9Y654	Heterochromatin-specific nonhistone protein (Fragment)	CBX1	0.004	10.4575	1	17.5	4.89	0	0	0	0	0	0	0	0
P50990	T-complex protein 1 subunit theta	CCT8	0	5.29197	2	59.6	5.6	0	0	0	0	0	0	0	0
A0A024QZC1	CD2 antigen (Cytoplasmic tail) binding protein 2, isoform CRA_a	CD2BP2	0.005	4.10557	1	37.6	4.61	0	0	0	0	0	0	0	0
A0A024R880	Cyclin-dependent kinase 9 (CDC2-related kinase), isoform CRA_a	CDK9	0	6.72043	2	42.8	8.79	0	0	0	0	0	0	0	0
Q9NXV6	CDKN2A-interacting protein	CDKN2AIP	0.008	2.41379	1	61.1	9.01	0	0	0	0	0	0	0	0
D2IYL2	Corneodesmosin	CDSN	0.002	3.40265	1	51.5	8.35	0	0	0	0	0	0	0	0
Q5SW79	Centrosomal protein of 170 kDa	CEP170	0.002	0.883838	1	175.2	7.11	0	0	0	0	0	0	0	0
Q9Y6A4	Cilia- and flagella-associated protein 20	CFAP20	0	6.21762	1	22.8	9.76	0	0	0	0	0	0	0	0
Q8WWK9	Cytoskeleton-associated protein 2	CKAP2	0.004	1.90337	1	76.9	9.41	0	0	0	0	0	0	0	0
Q14028	Cyclic nucleotide-gated cation channel beta-1	CNGB1	0.002	0.799361	1	139.6	4.81	0	0	0	0	0	0	0	0
P09543	2',3'-cyclic-nucleotide 3'-phosphodiesterase	CNP	0	7.36342	2	47.5	9.07	0	0	0	0	0	0	0	0
O75128	Protein cordon-bleu	COBL	0.002	1.18953	1	135.5	7.75	0	0	0	0	0	0	0	0
P53621	Coatomer subunit alpha	COPA	0.002	2.04248	2	138.3	7.66	0	0	0	0	0	0	0	0
A0A097Q0T5	Cytochrome c oxidase subunit 2	COX2	0.002	7.04846	1	25.5	4.75	0	0	0	0	0	0	0	0
H9STE0	Cytochrome c oxidase subunit 2	COX2	0.003	6.92641	1	25.9	4.82	0	0	0	0	0	0	0	0
H0UI06	Cytochrome c oxidase subunit 7A2, mitochondrial	COX7A2	0.002	11.3043	1	12.8	9.13	0	0	0	0	0	0	0	0
Q10570	Cleavage and polyadenylation specificity factor subunit 1	CPSF1	0.007	0.900901	1	160.8	6.4	0	0	0	0	0	0	0	0
P61962	DDB1- and CUL4-associated factor 7	DCAF7	0	4.38596	1	38.9	5.52	0	0	0	0	0	0	0	0
Q9UJW0	Dynactin subunit 4	DCTN4	0	5.43478	2	52.3	7.34	0	0	0	0	0	0	0	0
A0A024RAD5	Dolichyl-diphosphooligosaccharide--protein glycosyltransferase 48 kDa subunit	DDOST	0.007	2.41228	1	50.7	6.4	0	0	0	0	0	0	0	0
P35659	Protein DEK	DEK	0.005	3.2	1	42.6	8.56	0	0	0	0	0	0	0	0
Q99615	DnaJ homolog subfamily C member 7	DNAJC7	0	5.06073	2	56.4	6.96	0	0	0	0	0	0	0	0
Q9Y295	Developmentally-regulated GTP-binding protein 1	DRG1	0	11.4441	3	40.5	8.9	0	0	0	0	0	0	0	0
Q4W4Y1	Dopamine receptor interacting protein 4	DRIP4	0	5.18433	3	96	6.52	0	0	0	0	0	0	0	0
Q14126	Desmoglein-2	DSG2	0	3.22004	2	122.2	5.24	0	0	0	0	0	0	0	0
Q96F86	Enhancer of mRNA-decapping protein 3	EDC3	0	2.75591	1	56	7.11	0	0	0	0	0	0	0	0
A0A024R3W7	Eukaryotic translation elongation factor 1 beta 2, isoform CRA_a	EEF1B2	0.002	5.77778	1	24.7	4.67	0	0	0	0	0	0	0	0
P26641	Elongation factor 1-gamma	EEF1G	0.002	2.97483	1	50.1	6.67	0	0	0	0	0	0	0	0
Q96C19	EF-hand domain-containing protein D2	EFHD2	0	9.16667	2	26.7	5.2	0	0	0	0	0	0	0	0
B5BU01	Eukaryotic translation initiation factor 2 beta	EIF2S2	0	7.20721	2	38.3	5.94	0	0	0	0	0	0	0	0
P55884	Eukaryotic translation initiation factor 3 subunit B	EIF3B	0.002	1.7199	1	92.4	5	0	0	0	0	0	0	0	0
B3KSH1	Eukaryotic translation initiation factor 3 subunit F	EIF3F	0	4.56989	1	39.1	5.45	0	0	0	0	0	0	0	0
B3KS98	Eukaryotic translation initiation factor 3 subunit H	EIF3S3	0.002	5.19126	1	41.6	7.33	0	0	0	0	0	0	0	0
Q4LE58	eIF4G1 variant protein (Fragment)	EIF4G1 variant protein	0	3.50985	4	178	5.31	0	0	0	0	0	0	0	0
P50402	Emerin	EMD	0	14.5669	3	29	5.5	0	0	0	0	0	0	0	0
A0A0S3CPE7	Envelope glycoprotein (Fragment)	env	0.002	4.62428	1	39.3	8.44	0	0	0	0	0	0	0	0
A7U979	Envelope glycoprotein (Fragment)	env	0.003	4.74777	1	37.7	8.76	0	0	0	0	0	0	0	0
T2CME2	Envelope glycoprotein gp160	env	0.008	1.75029	1	96.3	8.38	0	0	0	0	0	0	0	0
P07814	Bifunctional glutamate/proline--tRNA ligase	EPRS	0.007	1.19048	1	170.5	7.33	0	0	0	0	0	0	0	0
Q9UBC2	Epidermal growth factor receptor substrate 15-like 1	EPS15L1	0.002	1.85185	1	94.2	5.11	0	0	0	0	0	0	0	0
P30040	Endoplasmic reticulum resident protein 29	ERP29	0.006	5.74713	1	29	7.31	0	0	0	0	0	0	0	0
A0A0A0MRJ7	Coagulation factor V	F5	0.002	0.583221	1	252.1	6.05	0	0	0	0	0	0	0	0
Q9NSI2	Protein FAM207A	FAM207A	0.004	6.08696	1	25.4	11.08	0	0	0	0	0	0	0	0
Q8NCA5	Protein FAM98A	FAM98A	0	2.89017	1	55.4	9.03	0	0	0	0	0	0	0	0
P49327	Fatty acid synthase	FASN	0	2.27001	4	273.3	6.44	0	0	0	0	0	0	0	0
C9JC84	Fibrinogen gamma chain	FGG	0.002	2.60304	1	52.3	5.63	0	0	0	0	0	0	0	0
P20930	Filaggrin	FLG	0	0.566363	2	434.9	9.25	0	0	0	0	0	0	0	0
Q8NF17	FLJ00385 protein (Fragment)	FLJ00385	0.007	1.76817	1	56.1	7.59	0	0	0	0	0	0	0	0
X5D907	Fragile X mental retardation 1 isoform C (Fragment)	FMR1	0.002	2.52525	1	66.9	7.23	0	0	0	0	0	0	0	0
Q14331	Protein FRG1	FRG1	0.002	5.03876	1	29.2	9.01	0	0	0	0	0	0	0	0
A0A024RDE5	Ras-GTPase activating protein SH3 domain-binding protein 2, isoform CRA_a	G3BP2	0	6.84647	2	54.1	5.55	0	0	0	0	0	0	0	0
Q9BVP2	Guanine nucleotide-binding protein-like 3	GNL3	0.002	3.82514	2	62	9.16	0	0	0	0	0	0	0	0
Q08379	Golgin subfamily A member 2	GOLGA2	0.002	1.1976	1	113	5.02	0	0	0	0	0	0	0	0
Q12849	G-rich sequence factor 1	GRSF1	0	5.83333	2	53.1	6.19	0	0	0	0	0	0	0	0
Q00403	Transcription initiation factor IIB	GTF2B	0.002	6.32911	1	34.8	8.35	0	0	0	0	0	0	0	0
X5DR09	General transcription factor IIi isoform A (Fragment)	GTF2I	0	2.80561	2	112.3	6.39	0	0	0	0	0	0	0	0
H3BS72	Very-long-chain (3R)-3-hydroxyacyl-CoA dehydratase	HACD3	0.002	3.5	1	47.1	8.85	0	0	0	0	0	0	0	0
A0A024R9P1	HCG2026745, isoform CRA_a	hCG_2026745	0	4.91803	1	34.1	11.81	0	0	0	0	0	0	0	0
V9HWE9	Epididymis secretory protein Li 22	HEL-S-22	0	9.04762	1	23.3	5.64	0	0	0	0	0	0	0	0
A0A0K0K1K4	Proteasome subunit alpha type	HEL-S-276	0.002	6.04839	1	27.9	8.46	0	0	0	0	0	0	0	0
V9HW12	Epididymis secretory sperm binding protein Li 2a	HEL-S-2a	0	14.1414	2	21.9	5.97	0	0	0	0	0	0	0	0
V9HW37	Epididymis secretory protein Li 69	HEL-S-69	0	4.80591	2	59.6	5.66	0	0	0	0	0	0	0	0
Q1KMD3	Heterogeneous nuclear ribonucleoprotein U-like protein 2	HNRNPUL2	0	1.87416	1	85.1	4.91	0	0	0	0	0	0	0	0
A0A0A0MS14	Immunoglobulin heavy variable 1-45	IGHV1-45	0	9.40171	1	13.5	9.1	0	0	0	0	0	0	0	0
Q9NRY2	SOSS complex subunit C	INIP	0.007	12.5	1	11.4	9.25	0	0	0	0	0	0	0	0
A4QPB0	IQ motif containing GTPase activating protein 1	IQGAP1	0	3.3796	4	189.2	6.48	0	0	0	0	0	0	0	0
Q8N9B5	Junction-mediating and -regulatory protein	JMY	0.002	1.417	1	111.4	6.18	0	0	0	0	0	0	0	0
Q71RC2	La-related protein 4	LARP4	0.002	1.79558	1	80.5	6.61	0	0	0	0	0	0	0	0
Q9Y4W2	Ribosomal biogenesis protein LAS1L	LAS1L	0	2.31608	1	83	4.73	0	0	0	0	0	0	0	0
A0A024R1S8	LIM and SH3 protein 1, isoform CRA_b	LASP1	0.002	10.3448	2	29.7	7.05	0	0	0	0	0	0	0	0
O95202	LETM1 and EF-hand domain-containing protein 1, mitochondrial	LETM1	0	1.62382	1	83.3	6.7	0	0	0	0	0	0	0	0
P09382	Galectin-1	LGALS1	0	11.8519	1	14.7	5.5	0	0	0	0	0	0	0	0
A0A0S2Z3Y1	Lectin galactoside-binding soluble 3 binding protein isoform 1 (Fragment)	LGALS3BP	0.002	2.22222	1	65.3	5.27	0	0	0	0	0	0	0	0
P49916	DNA ligase 3	LIG3	0.002	1.48662	1	112.8	9.01	0	0	0	0	0	0	0	0
P02545	Prelamin-A/C	LMNA	0.003	2.10843	1	74.1	7.02	0	0	0	0	0	0	0	0
A4D0W6	Similar to ribosomal protein L18; 60S ribosomal protein L18	LOC136143	0.002	5.80357	1	24.9	9.7	0	0	0	0	0	0	0	0
Q5VUJ6	Leucine-rich repeat and calponin homology domain-containing protein 2	LRCH2	0.002	1.43791	1	84.5	6.55	0	0	0	0	0	0	0	0
K7ELG9	Protein LSM12 homolog	LSM12	0	5.65217	1	24.9	7.42	0	0	0	0	0	0	0	0
A0A087WZ40	Ensconsin	MAP7	0	3.46598	2	87.8	9.77	0	0	0	0	0	0	0	0
P31153	S-adenosylmethionine synthase isoform type-2	MAT2A	0.007	3.79747	1	43.6	6.48	0	0	0	0	0	0	0	0
Q9BTE3	Mini-chromosome maintenance complex-binding protein	MCMBP	0.002	1.55763	1	72.9	5.87	0	0	0	0	0	0	0	0
Q9UBU8	Mortality factor 4-like protein 1	MORF4L1	0.007	3.59116	1	41.4	9.28	0	0	0	0	0	0	0	0
Q96A35	39S ribosomal protein L24, mitochondrial	MRPL24	0.002	6.01852	1	24.9	9.29	0	0	0	0	0	0	0	0
S4R369	39S ribosomal protein L37, mitochondrial	MRPL37	0.002	3.31263	1	54.9	9.42	0	0	0	0	0	0	0	0
Q9NQ50	39S ribosomal protein L40, mitochondrial	MRPL40	0	7.76699	1	24.5	9.63	0	0	0	0	0	0	0	0
Q7Z7F7	39S ribosomal protein L55, mitochondrial	MRPL55	0.002	12.5	1	15.1	11.15	0	0	0	0	0	0	0	0
P82650	28S ribosomal protein S22, mitochondrial	MRPS22	0.002	3.33333	1	41.3	7.9	0	0	0	0	0	0	0	0
Q92552	28S ribosomal protein S27, mitochondrial	MRPS27	0	3.62319	1	47.6	6.18	0	0	0	0	0	0	0	0
A0A0A0MR39	Myelin expression factor 2	MYEF2	0.002	1.83333	1	64.1	8.87	0	0	0	0	0	0	0	0
P28331	NADH-ubiquinone oxidoreductase 75 kDa subunit, mitochondrial	NDUFS1	0	4.40165	2	79.4	6.23	0	0	0	0	0	0	0	0
O75306	NADH dehydrogenase [ubiquinone] iron-sulfur protein 2, mitochondrial	NDUFS2	0.008	2.59179	1	52.5	7.55	0	0	0	0	0	0	0	0
O75489	NADH dehydrogenase [ubiquinone] iron-sulfur protein 3, mitochondrial	NDUFS3	0.002	6.43939	1	30.2	7.5	0	0	0	0	0	0	0	0
F5GXJ1	NADH dehydrogenase [ubiquinone] iron-sulfur protein 7, mitochondrial	NDUFS7	0.002	5.9322	1	25.4	9.89	0	0	0	0	0	0	0	0
Q9BYG3	MKI67 FHA domain-interacting nucleolar phosphoprotein	NIFK	0	15.3584	3	34.2	9.88	0	0	0	0	0	0	0	0
A0A024R8R4	Nuclear protein localization 4 homolog (S. cerevisiae), isoform CRA_a	NPLOC4	0.002	2.96053	1	68.1	6.38	0	0	0	0	0	0	0	0
A0A024R6W2	Nudix (Nucleoside diphosphate linked moiety X)-type motif 21, isoform CRA_a	NUDT21	0	19.3833	4	26.2	8.82	0	0	0	0	0	0	0	0
Q7Z417	Nuclear fragile X mental retardation-interacting protein 2	NUFIP2	0	1.8705	1	76.1	8.7	0	0	0	0	0	0	0	0
A0A024QZW7	Nucleoporin 153kDa, isoform CRA_a	NUP153	0.002	0.881356	1	153.9	8.73	0	0	0	0	0	0	0	0
P04181	Ornithine aminotransferase, mitochondrial	OAT	0.003	2.2779	1	48.5	7.03	0	0	0	0	0	0	0	0
A0A024R8S5	Protein disulfide-isomerase	P4HB	0	5.51181	2	57.1	4.87	0	0	0	0	0	0	0	0
Q05D08	PA2G4 protein (Fragment)	PA2G4	0	5.41872	2	45.1	8.95	0	0	0	0	0	0	0	0
Q13442	28 kDa heat- and acid-stable phosphoprotein	PDAP1	0	14.9171	2	20.6	8.87	0	0	0	0	0	0	0	0
P11177	Pyruvate dehydrogenase E1 component subunit beta, mitochondrial	PDHB	0	8.91365	2	39.2	6.65	0	0	0	0	0	0	0	0
P13667	Protein disulfide-isomerase A4	PDIA4	0.002	3.56589	2	72.9	5.07	0	0	0	0	0	0	0	0
D9IAI1	Epididymis secretory protein Li 34	PEBP1	0.002	10.6952	1	21	7.53	0	0	0	0	0	0	0	0
B4E0T2	Peroxisomal targeting signal 1 receptor	PEX5	0	5	2	73.1	4.61	0	0	0	0	0	0	0	0
Q9UHV9	Prefoldin subunit 2	PFDN2	0.002	9.09091	1	16.6	6.58	0	0	0	0	0	0	0	0
Q9Y237	Peptidyl-prolyl cis-trans isomerase NIMA-interacting 4	PIN4	0.002	9.16031	1	13.8	9.77	0	0	0	0	0	0	0	0
Q13835	Plakophilin-1	PKP1	0	3.61446	2	82.8	9.13	0	0	0	0	0	0	0	0
Q99959	Plakophilin-2	PKP2	0.002	1.24858	1	97.4	9.33	0	0	0	0	0	0	0	0
Q8N3E9	1-phosphatidylinositol 4,5-bisphosphate phosphodiesterase delta-3	PLCD3	0	1.90114	1	89.2	6.98	0	0	0	0	0	0	0	0
O15160	DNA-directed RNA polymerases I and III subunit RPAC1	POLR1C	0.002	3.75723	1	39.2	5.5	0	0	0	0	0	0	0	0
P52434	DNA-directed RNA polymerases I, II, and III subunit RPABC3	POLR2H	0.002	8.66667	1	17.1	4.68	0	0	0	0	0	0	0	0
A0A0A0MS24	Protein phosphatase 1 regulatory subunit	PPP1R12B	0.001	2.58869	2	116.4	5.85	0	0	0	0	0	0	0	0
A0A0S2Z556	Polyglutamine binding protein 1 isoform 2 (Fragment)	PQBP1	0.004	4.27046	1	32.2	6.34	0	0	0	0	0	0	0	0
P30048	Thioredoxin-dependent peroxide reductase, mitochondrial	PRDX3	0.002	5.46875	1	27.7	7.78	0	0	0	0	0	0	0	0
P78527	DNA-dependent protein kinase catalytic subunit	PRKDC	0	0.944767	3	468.8	7.12	0	0	0	0	0	0	0	0
Q8WWY3	U4/U6 small nuclear ribonucleoprotein Prp31	PRPF31	0.002	4.80962	2	55.4	5.78	0	0	0	0	0	0	0	0
Q14558	Phosphoribosyl pyrophosphate synthase-associated protein 1	PRPSAP1	0.002	3.93258	1	39.4	7.2	0	0	0	0	0	0	0	0
Q5JSZ5	Protein PRRC2B	PRRC2B	0.002	0.672948	1	242.8	8.34	0	0	0	0	0	0	0	0
Q9Y520	Protein PRRC2C	PRRC2C	0.002	0.345304	1	316.7	9.13	0	0	0	0	0	0	0	0
P43686	26S protease regulatory subunit 6B	PSMC4	0.002	4.30622	1	47.3	5.21	0	0	0	0	0	0	0	0
P62195	26S protease regulatory subunit 8	PSMC5	0.004	3.20197	1	45.6	7.55	0	0	0	0	0	0	0	0
Q5VWC4	26S proteasome non-ATPase regulatory subunit 4	PSMD4	0	5.78947	2	41.1	4.81	0	0	0	0	0	0	0	0
P51151	Ras-related protein Rab-9A	RAB9A	0.002	6.96517	1	22.8	5.47	0	0	0	0	0	0	0	0
A0A024R136	Rac GTPase activating protein 1, isoform CRA_a	RACGAP1	0.002	2.53165	1	71	8.88	0	0	0	0	0	0	0	0
F6WQW2	Ran-specific GTPase-activating protein	RANBP1	0.002	7.19424	2	31.9	8.75	0	0	0	0	0	0	0	0
A0A0A0MR66	RNA binding motif protein 10, isoform CRA_d	RBM10	0	3.71859	3	110.3	6.28	0	0	0	0	0	0	0	0
Q96T37	Putative RNA-binding protein 15	RBM15	0.002	1.43296	1	107.1	10.08	0	0	0	0	0	0	0	0
D2K3X6	Replication initiation protein RepE	repE	0.002	4.78088	1	29.3	9.42	0	0	0	0	0	0	0	0
P35251	Replication factor C subunit 1	RFC1	0	2.26481	2	128.2	9.36	0	0	0	0	0	0	0	0
P35249	Replication factor C subunit 4	RFC4	0.002	3.85675	1	39.7	8.02	0	0	0	0	0	0	0	0
Q5UIP0	Telomere-associated protein RIF1	RIF1	0	1.86084	3	274.3	5.52	0	0	0	0	0	0	0	0
H0Y8C2	60S ribosomal protein L22-like 1 (Fragment)	RPL22L1	0	8.4507	1	16.9	9.25	0	0	0	0	0	0	0	0
P39023	60S ribosomal protein L3	RPL3	0.002	2.97767	1	46.1	10.18	0	0	0	0	0	0	0	0
F8W727	60S ribosomal protein L32	RPL32	0	13.0719	2	18	10.59	0	0	0	0	0	0	0	0
A0A024R8P8	Ribosomal protein L38, isoform CRA_a	RPL38	0.002	18.5714	1	8.2	10.1	0	0	0	0	0	0	0	0
P62891	60S ribosomal protein L39	RPL39	0.002	19.6078	1	6.4	12.56	0	0	0	0	0	0	0	0
Q14684	Ribosomal RNA processing protein 1 homolog B	RRP1B	0.004	2.11082	1	84.4	9.76	0	0	0	0	0	0	0	0
Q9Y3I0	tRNA-splicing ligase RtcB homolog	RTCB	0.006	1.78218	1	55.2	7.23	0	0	0	0	0	0	0	0
B5BUB1	RuvB-like helicase (Fragment)	RUVBL1	0.002	2.85088	1	50.2	6.42	0	0	0	0	0	0	0	0
Q14151	Scaffold attachment factor B2	SAFB2	0	2.51836	2	107.4	6.16	0	0	0	0	0	0	0	0
Q15637	Splicing factor 1	SF1	0	8.13772	4	68.3	8.98	0	0	0	0	0	0	0	0
Q05DF2	SF3A2 protein (Fragment)	SF3A2	0	2.9106	1	51.4	10.11	0	0	0	0	0	0	0	0
O75533	Splicing factor 3B subunit 1	SF3B1	0	3.06748	3	145.7	7.09	0	0	0	0	0	0	0	0
Q9Y3B4	Splicing factor 3B subunit 6	SF3B6	0	20.8	2	14.6	9.38	0	0	0	0	0	0	0	0
A0A024R8U5	Splicing factor, arginine/serine-rich 2, isoform CRA_a	SFRS2	0	11.3122	2	25.5	11.85	0	0	0	0	0	0	0	0
D9HTE9	Plasma membrane citrate carrier	SLC25A1	0.002	7.2327	2	35	9.99	0	0	0	0	0	0	0	0
X6R3P0	Slit homolog 2 protein	SLIT2	0	2.14008	2	171.2	6.84	0	0	0	0	0	0	0	0
Q14683	Structural maintenance of chromosomes protein 1A	SMC1A	0.002	0.81103	1	143.1	7.64	0	0	0	0	0	0	0	0
Q8ND04	Protein SMG8	SMG8	0	2.4218	1	109.6	7.68	0	0	0	0	0	0	0	0
O75643	U5 small nuclear ribonucleoprotein 200 kDa helicase	SNRNP200	0	1.59176	2	244.4	6.06	0	0	0	0	0	0	0	0
Q8WVK2	U4/U6.U5 small nuclear ribonucleoprotein 27 kDa protein	SNRNP27	0.002	9.67742	1	18.8	11.62	0	0	0	0	0	0	0	0
B5BTZ8	Small nuclear ribonucleoprotein polypeptide B''	SNRPB2	0.007	4.88889	1	25.4	9.72	0	0	0	0	0	0	0	0
B1AHD1	NHP2-like protein 1	SNU13	0.005	9.09091	1	14.6	8.46	0	0	0	0	0	0	0	0
A0A024QYY9	Spectrin domain with coiled-coils 1, isoform CRA_a	SPECC1	0	2.05993	2	118.5	6.7	0	0	0	0	0	0	0	0
D3DR65	SPFH domain family, member 1, isoform CRA_a	SPFH1	0.002	3.44828	1	39.1	7.87	0	0	0	0	0	0	0	0
A2RUF3	SLIT-ROBO Rho GTPase activating protein 2	SRGAP2	0	2.33427	2	120.8	6.7	0	0	0	0	0	0	0	0
Q9UHB9	Signal recognition particle subunit SRP68	SRP68	0	12.4402	5	70.7	8.56	0	0	0	0	0	0	0	0
Q9Y5M8	Signal recognition particle receptor subunit beta	SRPRB	0	11.8081	2	29.7	9.04	0	0	0	0	0	0	0	0
Q9BXP5	Serrate RNA effector molecule homolog	SRRT	0.003	1.48402	1	100.6	5.96	0	0	0	0	0	0	0	0
B5BUB5	Autoantigen La (Fragment)	SSB	0	5.88235	2	46.8	7.12	0	0	0	0	0	0	0	0
P51571	Translocon-associated protein subunit delta	SSR4	0.002	7.51445	1	19	6.15	0	0	0	0	0	0	0	0
O60232	Sjoegren syndrome/scleroderma autoantigen 1	SSSCA1	0.002	8.54271	1	21.5	5.24	0	0	0	0	0	0	0	0
Q9UNE7	E3 ubiquitin-protein ligase CHIP	STUB1	0	4.9505	1	34.8	5.87	0	0	0	0	0	0	0	0
P23193	Transcription elongation factor A protein 1	TCEA1	0.002	3.98671	1	33.9	8.38	0	0	0	0	0	0	0	0
A0A024R355	Three prime histone mRNA exonuclease 1, isoform CRA_b	THEX1	0.002	4.29799	1	40	6.7	0	0	0	0	0	0	0	0
O43615	Mitochondrial import inner membrane translocase subunit TIM44	TIMM44	0.002	2.87611	1	51.3	8.32	0	0	0	0	0	0	0	0
A0A1B0GTW1	Tight junction protein ZO-2	TJP2	0	4.08327	4	140.6	8.19	0	0	0	0	0	0	0	0
H0Y9X1	Translation machinery-associated protein 16 (Fragment)	TMA16	0	8.26446	1	27.7	9.57	0	0	0	0	0	0	0	0
Q96GM8	Target of EGR1 protein 1	TOE1	0	2.7451	1	56.5	7.18	0	0	0	0	0	0	0	0
B9EG90	Topoisomerase (DNA) I	TOP1	0.002	3.39869	2	90.6	9.31	0	0	0	0	0	0	0	0
Q9H2D6	TRIO and F-actin-binding protein	TRIOBP	0.002	0.761099	1	261.2	8.48	0	0	0	0	0	0	0	0
Q9UI30	Multifunctional methyltransferase subunit TRM112-like protein	TRMT112	0	22.4	2	14.2	5.26	0	0	0	0	0	0	0	0
Q12792	Twinfilin-1	TWF1	0.002	3.71429	1	40.3	6.96	0	0	0	0	0	0	0	0
A0A087WTW0	E3 ubiquitin-protein ligase UHRF1	UHRF1	0.003	1.16686	1	96.6	8.34	0	0	0	0	0	0	0	0
Q93008	Probable ubiquitin carboxyl-terminal hydrolase FAF-X	USP9X	0.002	0.428016	1	292.1	5.8	0	0	0	0	0	0	0	0
P46939	Utrophin	UTRN	0.003	0.407807	1	394.2	5.33	0	0	0	0	0	0	0	0
P21796	Voltage-dependent anion-selective channel protein 1	VDAC1	0	8.48057	2	30.8	8.54	0	0	0	0	0	0	0	0
Q9Y5A9	YTH domain-containing family protein 2	YTHDF2	0	6.90846	3	62.3	8.79	0	0	0	0	0	0	0	0
A0A087WY31	YTH domain-containing family protein 3	YTHDF3	0.002	2.21088	1	64.5	8.24	0	0	0	0	0	0	0	0
Q8WU90	Zinc finger CCCH domain-containing protein 15	ZC3H15	0.002	3.28638	1	48.6	5.31	0	0	0	0	0	0	0	0
A0A087WXF8	Nucleolar protein of 40 kDa	ZCCHC17	0	11.4068	2	29.6	9.64	0	0	0	0	0	0	0	0
P62318	Small nuclear ribonucleoprotein Sm D3	SNRPD3	0.002	7.93651	1	13.9	10.32	0.0173977	0.0482259	0.0390691	0	0	0	0	0
A0A024RDF6	Heterogeneous nuclear ribonucleoprotein D-like, isoform CRA_a	HNRPDL	0	6.19048	2	46.4	9.57	0.0173977	0	0	0	0	0.0203182	0.154715	0.105627
F6N0C4	Protein Rev (Fragment)	rev	0.002	10.989	1	10.3	8.63	0.0173977	0	0	0	0	0.0203182	0	0
Q01449	Myosin regulatory light chain 2, atrial isoform	MYL7	0.002	5.71429	1	19.4	4.88	0.0173977	0	0	0	0	0.0329612	0	0
B0AZQ4	Structural maintenance of chromosomes protein		0	3.12243	3	141.4	7.18	0.0173977	0	0	0	0	0	0	0
A8K486	Peptidyl-prolyl cis-trans isomerase		0	23.6364	3	18	6.9	0.0173977	0	0	0	0	0	0	0
P78371	T-complex protein 1 subunit beta	CCT2	0.004	2.24299	1	57.5	6.46	0.0173977	0	0	0	0	0	0	0
Q14204	Cytoplasmic dynein 1 heavy chain 1	DYNC1H1	0	0.516573	2	532.1	6.4	0.0173977	0	0	0	0	0	0	0
A0A024R7M6	GATA zinc finger domain containing 2A, isoform CRA_a	GATAD2A	0.003	1.73502	1	68.1	9.94	0.0173977	0	0	0	0	0	0	0
Q9UPQ0	LIM and calponin homology domains-containing protein 1	LIMCH1	0	6.09418	4	121.8	6.47	0.0173977	0	0	0	0	0	0	0
A0A024RAM4	Microtubule-associated protein 1B, isoform CRA_b	MAP1B	0	1.01297	2	270.5	4.81	0.0173977	0	0	0	0	0	0	0
A0A0S2Z4A5	DNA helicase (Fragment)	MCM7	0	4.03338	2	81.3	6.46	0.0173977	0	0	0	0	0	0	0
A8MYK1	39S ribosomal protein L23, mitochondrial	MRPL23	0	7.8534	1	21.8	11.62	0.0173977	0	0	0	0	0	0	0
H7BZJ3	Protein disulfide-isomerase A3 (Fragment)	PDIA3	0	21.1382	2	13.5	7.3	0.0173977	0	0	0	0	0	0	0
Q9HCY8	Protein S100-A14	S100A14	0.002	14.4231	1	11.7	5.24	0.0173977	0	0	0	0	0	0	0
P05109	Protein S100-A8	S100A8	0.002	11.828	1	10.8	7.03	0.0173977	0	0	0	0	0	0	0
X6RAL5	Histone deacetylase complex subunit SAP18	SAP18	0	7.55814	1	19.5	9.8	0.0173977	0	0	0	0	0	0	0
F8VXC8	SWI/SNF complex subunit SMARCC2	SMARCC2	0	1.68675	1	136.1	5.71	0.0173977	0	0	0	0	0	0	0
P28290	Sperm-specific antigen 2	SSFA2	0	3.49484	3	138.3	5.19	0.0173977	0	0	0	0	0	0	0
Q9Y3F4	Serine-threonine kinase receptor-associated protein	STRAP	0.002	5.14286	1	38.4	5.12	0.0173977	0	0	0	0	0	0	0
Q7L0Y3	Mitochondrial ribonuclease P protein 1	TRMT10C	0.002	2.72953	1	47.3	9.36	0.0173977	0	0	0	0	0	0	0
Q14157	Ubiquitin-associated protein 2-like	UBAP2L	0.002	1.37994	1	114.5	7.11	0.0173977	0	0	0	0	0	0	0
Q5BKZ1	DBIRD complex subunit ZNF326	ZNF326	0.002	2.74914	1	65.6	5.15	0.0173977	0	0	0	0	0	0	0
O00488	Zinc finger protein 593	ZNF593	0	18.6567	2	15.2	9.82	0.0231617	0.0288667	0	0.032275	0	0	0	0
Q5D862	Filaggrin-2	FLG2	0	0.501882	1	247.9	8.31	0.0231617	0	0	0	0	0	0	0.066972
P12268	Inosine-5'-monophosphate dehydrogenase 2	IMPDH2	0	3.89105	2	55.8	6.9	0.0231617	0	0	0	0	0	0.0445477	0
P26368	Splicing factor U2AF 65 kDa subunit	U2AF2	0	9.68421	3	53.5	9.09	0.0231617	0	0	0.0541236	0	0	0	0
A8K521	DNA helicase		0	3.81471	2	82.2	8.37	0.0231617	0	0	0	0	0	0	0
A0A024R2T6	DEAH (Asp-Glu-Ala-His) box polypeptide 30, isoform CRA_b	DHX30	0	3.18258	3	133.9	8.78	0.0231617	0	0	0	0	0	0	0
D3DSQ0	Pericentriolar material 1, isoform CRA_a	PCM1	0	1.58103	3	228.4	5.02	0.0231617	0	0	0	0	0	0	0
H0Y4Z8	Chromosome 9 open reading frame 86, isoform CRA_b	RABL6	0	6.57534	3	79.6	5.22	0.023212	0	0	0	0	0	0	0.0656769
P29401	Transketolase	TKT	0	5.939	2	67.8	7.66	0.023212	0	0	0	0	0.0578127	0	0
Q96CT7	Coiled-coil domain-containing protein 124	CCDC124	0	10.3139	2	25.8	9.54	0.023212	0	0	0	0	0	0	0
P99999	Cytochrome c	CYCS	0	13.3333	1	11.7	9.57	0.023212	0	0	0	0	0	0	0
Q08211	ATP-dependent RNA helicase A	DHX9	0	3.54331	3	140.9	6.84	0.023212	0	0	0	0	0	0	0
Q8NF37	Lysophosphatidylcholine acyltransferase 1	LPCAT1	0	2.43446	1	59.1	6.02	0.023212	0	0	0	0	0	0	0
B0YJ88	Radixin	RDX	0	4.11664	2	68.5	6.37	0.023212	0	0	0	0	0	0	0
Q08945	FACT complex subunit SSRP1	SSRP1	0	3.66714	2	81	6.87	0.023212	0	0	0	0	0	0	0
P31689	DnaJ homolog subfamily A member 1	DNAJA1	0	9.57179	3	44.8	7.08	0.023217	0.0482259	0	0.0541236	0	0.0386867	0	0
O94973	AP-2 complex subunit alpha-2	AP2A2	0	3.51438	2	103.9	6.96	0.023217	0	0	0	0	0.0260436	0	0
B4E0L0	cDNA FLJ54030, highly similar to Polymerase delta-interacting protein 3		0	6.16438	2	48.1	9.92	0.023217	0	0	0	0	0	0	0
Q9Y3Y2	Chromatin target of PRMT1 protein	CHTOP	0	10.4839	2	26.4	12.23	0.023217	0	0	0	0	0	0	0
Q13242	Serine/arginine-rich splicing factor 9	SRSF9	0	14.4796	3	25.5	8.65	0.023217	0	0	0	0	0	0	0
A0A087WVQ6	Clathrin heavy chain	CLTC	0	2.02501	3	191.9	5.69	0.0289257	0	0	0	0	0.0386867	0	0
V9HWK0	Signal recognition particle subunit SRP72	HEL103	0	4.91803	2	74.6	9.26	0.0289257	0	0	0	0	0	0	0
P15880	40S ribosomal protein S2	RPS2	0	10.5802	3	31.3	10.24	0.0289257	0	0	0	0	0	0	0
J3QR44	Cyclin-dependent kinase 11B	CDK11B	0	3.89937	2	92.6	5.54	0.028976	0	0	0	0	0	0	0
Q9H444	Charged multivesicular body protein 4b	CHMP4B	0	11.1607	2	24.9	4.82	0.028976	0	0	0	0	0	0	0
A0A024R7U6	DNA helicase	MCM4	0	4.05562	2	96.5	6.74	0.028976	0	0	0	0	0	0	0
A0A024RBB7	Nucleosome assembly protein 1-like 1, isoform CRA_a	NAP1L1	0.002	4.34783	1	45.3	4.46	0.028976	0	0	0	0	0	0	0
B2R4C0	60S ribosomal protein L18a		0	19.8864	3	20.7	10.71	0.0290263	0	0	0	0	0.0501375	0	0
B2R6J2	cDNA, FLJ92973, highly similar to Homo sapiens villin 2 (ezrin) (VIL2), mRNA		0	6.31399	3	69.4	6.27	0.0290313	0	0	0	0	0	0	0
P27708	CAD protein	CAD	0	2.24719	3	242.8	6.46	0.0290313	0	0	0	0	0	0	0
Q13185	Chromobox protein homolog 3	CBX3	0	23.4973	3	20.8	5.33	0.0347451	0	0	0	0	0	0	0
Q9UHX1	Poly(U)-binding-splicing factor PUF60	PUF60	0	12.5224	4	59.8	5.29	0.0347954	0	0	0.043457	0	0.0203182	0	0.132347
B4DJM5	cDNA FLJ61294, highly similar to Keratin, type I cytoskeletal 17		0	16.9492	3	18.9	8.13	0.0347954	0	0.0906319	0	0	0	0	0
P48047	ATP synthase subunit O, mitochondrial	ATP5O	0	17.8404	3	23.3	9.96	0.0348004	0	0	0	0	0.0285895	0	0
O75947	ATP synthase subunit d, mitochondrial	ATP5H	0	20.4969	2	18.5	5.3	0.0348456	0	0	0	0	0	0	0
O95782	AP-2 complex subunit alpha-1	AP2A1	0	5.62948	4	107.5	7.03	0.0348507	0	0	0	0	0.0343149	0	0
B4DLN1	cDNA FLJ60124, highly similar to Mitochondrial dicarboxylate carrier		0	10.4072	2	48.1	9.52	0.0348558	0	0	0	0	0.0343149	0	0
A0A024R6W0	Aspartate aminotransferase	GOT2	0	13.0233	5	47.4	9.01	0.0405594	0	0	0	0	0.0260436	0	0
A8K329	cDNA FLJ76656, highly similar to Homo sapiens scaffold attachment factor B (SAFB), mRNA		0	4.0393	3	102.7	5.44	0.0405594	0	0	0	0	0	0	0
B7Z4C8	60S ribosomal protein L31	RPL31	0	17.6923	2	15.1	10.37	0.0406097	0.0482042	0	0.075732	0	0	0.0784525	0.132498
B7Z809	cDNA FLJ56016, highly similar to C-1-tetrahydrofolate synthase, cytoplasmic		0	5	4	110.4	8.56	0.0406097	0	0	0	0	0	0	0
Q59EI9	ADP,ATP carrier protein, liver isoform T2 variant (Fragment)		0	13.9319	4	35.4	9.85	0.0406147	0	0	0	0	0	0.0665632	0.0919431
Q15717	ELAV-like protein 1	ELAVL1	0	10.7362	3	36.1	9.17	0.0406147	0	0	0	0	0	0.0549773	0
Q96AG4	Leucine-rich repeat-containing protein 59	LRRC59	0	20.5212	6	34.9	9.57	0.0406147	0	0	0	0	0	0.0559203	0
Q99623	Prohibitin-2	PHB2	0	9.699	3	33.3	9.83	0.040665	0	0	0	0	0	0.0777226	0.092893
Q14498	RNA-binding protein 39	RBM39	0	8.67925	3	59.3	10.1	0.040665	0	0	0	0	0	0	0
Q08J23	tRNA (cytosine(34)-C(5))-methyltransferase	NSUN2	0	7.1708	4	86.4	6.77	0.0463787	0	0	0	0	0.0203182	0.0883655	0.104979
Q14203	Dynactin subunit 1	DCTN1	0	6.10329	6	141.6	5.81	0.046429	0	0	0	0	0.0260436	0	0
Q96GA3	Protein LTV1 homolog	LTV1	0	4	1	54.8	4.91	0.046429	0	0	0	0	0.0343149	0	0
G3V1L9	Tight junction protein 1 (Zona occludens 1), isoform CRA_a	TJP1	0	6.3914	10	197.3	6.67	0.0520925	0.115489	0	0.118674	0	0	0	0
Q562R0	Actin-like protein (Fragment)	ACT	0	28.1553	2	11.5	6.35	0.0521478	0	0	0	0	0.0406364	0	0
A8MXP9	Matrin-3	MATR3	0	5.47486	3	99.9	6.04	0.0522433	0	0	0	0	0	0	0
P26599	Polypyrimidine tract-binding protein 1	PTBP1	0	12.9944	5	57.2	9.17	0.0579068	0	0	0	0	0.0730016	0	0
Q86UE4	Protein LYRIC	MTDH	0	8.93471	4	63.8	9.32	0.0580073	0	0	0	0	0	0	0
Q02413	Desmoglein-1	DSG1	0	5.05243	4	113.7	5.03	0.0637262	0	0	0	0	0.0584088	0	0
A0A024QZK8	Heterogeneous nuclear ribonucleoprotein H3 (2H9), isoform CRA_a	HNRPH3	0	8.67052	2	36.9	6.87	0.0694902	0	0	0	0	0.0483116	0	0
P37802	Transgelin-2	TAGLN2	0	34.1709	5	22.4	8.25	0.0695856	0	0.0771748	0	0	0	0.033175	0
P61163	Alpha-centractin	ACTR1A	0	15.4255	4	42.6	6.64	0.0695907	0	0	0	0	0.0520873	0	0
P42166	Lamina-associated polypeptide 2, isoform alpha	TMPO	0	13.6888	6	75.4	7.66	0.069641	0	0	0	0	0.0400403	0.0445477	0
D3DRX6	Kinesin-like protein	KIF5B	0	9.96885	7	109.6	6.51	0.0926971	0	0	0	0	0	0	0
G9K388	YWHAE/FAM22A fusion protein (Fragment)	YWHAE/FAM22A fusion	0	12.5	4	41.2	4.97	0	0	0.0791016	0.075732	0.0180289	0	0	0
B2R4V2	cDNA, FLJ92227, highly similar to Homo sapiens ribosomal protein L36a-like (RPL36AL), mRNA		0	16.9811	2	12.5	10.65	0	0	0	0	0.0180289	0	0	0
B2R761	cDNA, FLJ93299, highly similar to Homo sapiens sterol carrier protein 2 (SCP2), mRNA		0	5.66728	2	59	7.05	0	0	0	0	0.0180289	0	0	0
Q4VCS5	Angiomotin	AMOT	0	2.58303	2	118	7.64	0	0	0	0	0.0180289	0	0	0
A8K968	Band 4.1-like protein 3	EPB41L3	0	5.95238	3	84.7	5.44	0	0	0	0	0.0180289	0	0	0
Q5RKV6	Exosome complex component MTR3	EXOSC6	0	5.88235	1	28.2	6.28	0	0	0	0	0.0180289	0	0	0
A6NEM2	Host cell factor 1	HCFC1	0	1.39423	2	213.3	7.33	0	0	0	0	0.0180289	0	0	0
Q32MZ4	Leucine-rich repeat flightless-interacting protein 1	LRRFIP1	0	6.80693	4	89.2	4.65	0	0	0	0	0.0180289	0	0	0
Q9HC36	rRNA methyltransferase 3, mitochondrial	MRM3	0	2.85714	1	47	8.73	0	0	0	0	0.0180289	0	0	0
Q0ZGT2	Nexilin	NEXN	0.004	1.62963	1	80.6	5.33	0	0	0	0	0.0180289	0	0	0
A0A0A0MRM9	Nucleolar and coiled-body phosphoprotein 1 (Fragment)	NOLC1	0	7.34463	3	74.6	9.47	0	0	0	0	0.0180289	0	0	0
P30101	Protein disulfide-isomerase A3	PDIA3	0	7.52475	3	56.7	6.35	0	0	0	0	0.0180289	0	0	0
B5BUD2	Replication factor C 2 isoform 1 (Fragment)	RFC2	0	8.47458	2	39.2	6.44	0	0	0	0	0.0180289	0	0	0
J3KNL6	Protein transport protein Sec16A	SEC16A	0	1.2728	2	251.7	5.8	0	0	0	0	0.0180289	0	0	0
P0DME0	Protein SETSIP	SETSIP	0	7.94702	2	34.9	4.31	0	0	0	0	0.0180289	0	0	0
P62306	Small nuclear ribonucleoprotein F	SNRPF	0	15.1163	1	9.7	4.67	0	0	0	0	0.0180289	0	0	0
Q8N9Q2	Protein SREK1IP1	SREK1IP1	0	8.3871	1	18.2	9.85	0	0	0	0	0.0180289	0	0	0
Q9H9B4	Sideroflexin-1	SFXN1	0	8.69565	2	35.6	9.07	0.0173977	0	0	0.043457	0.0180289	0	0	0
A0A087WZN1	Isocitrate dehydrogenase [NAD] subunit, mitochondrial	IDH3B	0	4.39276	1	42.4	8.46	0.0173977	0	0	0	0.0180289	0	0	0
P61626	Lysozyme C	LYZ	0	14.1892	2	16.5	9.16	0.0173977	0	0	0	0.0180289	0	0	0
Q92499	ATP-dependent RNA helicase DDX1	DDX1	0	1.75676	1	82.4	7.23	0.023212	0	0	0	0.0180289	0	0	0
S4R3N1	HSPE1-MOB4 readthrough	HSPE1-MOB4	0	5.36398	1	29.7	6.16	0.023217	0	0	0	0.0180289	0	0.0557071	0.0655257
A0A024RDQ8	Replication factor C (Activator 1) 3, 38kDa, isoform CRA_a	RFC3	0	7.86517	2	40.5	8.34	0.028976	0	0	0	0.0180289	0	0	0
Q9NR30	Nucleolar RNA helicase 2	DDX21	0	3.32056	2	87.3	9.28	0.0290313	0	0	0	0.0180289	0	0	0
Q9H2W6	39S ribosomal protein L46, mitochondrial	MRPL46	0	13.2616	3	31.7	7.05	0.0347903	0	0	0	0.0180289	0	0	0
E7EVA0	Microtubule-associated protein	MAP4	0	1.95908	3	245.3	6.23	0.0406097	0	0	0	0.0180289	0	0	0
P62917	60S ribosomal protein L8	RPL8	0	10.5058	2	28	11.03	0.0406599	0.0383742	0	0	0.0180289	0	0.221885	0.250967
O95831	Apoptosis-inducing factor 1, mitochondrial	AIFM1	0	13.0506	6	66.9	8.95	0.0522535	0.0386966	0	0.043457	0.0180289	0.0285895	0	0
B2RDP6	cDNA, FLJ96709, highly similar to Homo sapiens glutamate rich WD repeat protein GRWD (GRWD), mRNA		0	7.17489	2	49.4	4.92	0	0	0	0	0.0238595	0.0260436	0	0
I1E4Y6	GRB10-interacting GYF protein 2	GIGYF2	0.002	0.908403	1	152.4	5.6	0	0	0	0	0.0238595	0	0	0
B4DWA7	Serine hydroxymethyltransferase		0	7.21248	3	56.3	9.42	0.0231617	0	0	0	0.0238595	0	0	0
A0A0B7NNI9	MHC class I antigen	HLA-C	0	10.1093	3	40.6	6.04	0	0.0478817	0	0	0.0238769	0	0	0
J3KQY1	39S ribosomal protein L22, mitochondrial	MRPL22	0	21.1207	4	26.5	9.74	0	0	0	0	0.0238769	0	0.0443344	0.0526408
Q9Y3U8	60S ribosomal protein L36	RPL36	0	19.0476	2	12.2	11.59	0	0	0	0	0.0238769	0	0.0997381	0
Q9ULV0	Unconventional myosin-Vb	MYO5B	0	3.78788	5	213.5	7.2	0	0	0	0	0.0238769	0.0260436	0	0
B4DRM3	cDNA FLJ54492, highly similar to Eukaryotic translation initiation factor 4B		0	7.46753	3	69.7	5.67	0.0173977	0	0	0.043457	0.0238769	0	0.177461	0.0656769
B2RBR9	cDNA, FLJ95650, highly similar to Homo sapiens karyopherin (importin) beta 1 (KPNB1), mRNA		0	7.19178	5	97.1	4.78	0.028976	0	0	0.0427015	0.0238769	0	0.0557071	0
A8K7D9	Importin subunit alpha		0	12.2873	4	57.8	5.4	0.0347451	0.0383742	0	0	0.0238769	0	0	0
Q13151	Heterogeneous nuclear ribonucleoprotein A0	HNRNPA0	0	10.1639	2	30.8	9.29	0.0347451	0	0	0	0.0238769	0.056459	0	0
P12273	Prolactin-inducible protein	PIP	0	43.8356	5	16.6	8.05	0.0347954	0	0	0	0.0238769	0.0329612	0	0
O14602	Eukaryotic translation initiation factor 1A, Y-chromosomal	EIF1AY	0	20.8333	3	16.4	5.24	0.0348507	0	0	0	0.0238769	0	0	0
P23284	Peptidyl-prolyl cis-trans isomerase B	PPIB	0	26.3889	5	23.7	9.41	0.0522585	0	0	0	0.0238769	0	0.287629	0.33132
A8K651	cDNA FLJ75700, highly similar to Homo sapiens complement component 1, q subcomponent binding protein (C1QBP), nuclear gene encoding mitochondrial protein, mRNA		0	11.7021	2	31.4	4.84	0	0.0577117	0	0	0.0243793	0	0	0
A0A0S2Z4Z9	Non-POU domain containing octamer-binding isoform 1 (Fragment)	NONO	0	9.97877	5	54.2	8.95	0.0289811	0	0	0.032275	0.0243793	0	0.06635	0.0396047
P49207	60S ribosomal protein L34	RPL34	0	15.3846	3	13.3	11.47	0.0289811	0	0	0.032275	0.0243793	0	0.077206	0
P51991	Heterogeneous nuclear ribonucleoprotein A3	HNRNPA3	0	11.9048	3	39.6	9.01	0.0347954	0	0	0	0.0243793	0	0.0445477	0
Q92522	Histone H1x	H1FX	0	22.5352	4	22.5	10.76	0.046429	0	0	0	0.0243793	0.0623083	0.110684	0.0912956
Q6UN15	Pre-mRNA 3'-end-processing factor FIP1	FIP1L1	0	7.74411	3	66.5	5.59	0	0.0577334	0.06502	0.0861584	0.0296901	0	0.0443344	0.0935405
E9KL35	Epididymis tissue sperm binding protein Li 3a		0	11.041	3	35.1	7.69	0	0	0.0515628	0	0.0296901	0	0	0
O00159	Unconventional myosin-Ic	MYO1C	0	8.37253	6	121.6	9.41	0.0348507	0	0	0	0.0296901	0.0546331	0	0
P07900	Heat shock protein HSP 90-alpha	HSP90AA1	0	13.1148	8	84.6	5.02	0	0.192172	0.302039	0.280084	0.0297075	0	0.39737	0.368831
F8W930	Insulin-like growth factor 2 mRNA-binding protein 2	IGF2BP2	0	6.44628	3	66.7	8.46	0	0	0	0	0.0297075	0	0	0
I3L504	Eukaryotic translation initiation factor 5A-1	EIF5A	0	10.7527	2	20.5	5.25	0.0173977	0	0	0	0.0297075	0	0	0
Q13045	Protein flightless-1 homolog	FLII	0	4.33412	4	144.7	6.05	0.0231617	0	0	0	0.0297075	0.0323651	0	0
P62244	40S ribosomal protein S15a	RPS15A	0	24.6154	4	14.8	10.13	0.028976	0.0672192	0	0	0.0297075	0	0	0
Q6PJJ2	RRP1 protein (Fragment)	RRP1	0	5.36481	2	53.4	9.48	0.028976	0	0	0	0.0297075	0	0	0
B2R8R5	cDNA, FLJ94025, highly similar to Homo sapiens tripartite motif-containing 28 (TRIM28), mRNA		0	8.26347	5	88.5	5.77	0.0406097	0	0	0	0.0297075	0.0386867	0	0
A7BI36	p180/ribosome receptor	RRBP1	0	5.19481	6	165.6	8.97	0.0463234	0	0	0	0.0297075	0.0730016	0	0
Q9BU76	Multiple myeloma tumor-associated protein 2	MMTAG2	0	19.7719	4	29.4	10.02	0.0173977	0.124351	0	0.074221	0.0297248	0.0203182	0.033175	0
Q9BUP0	EF-hand domain-containing protein D1	EFHD1	0	16.318	3	26.9	5.39	0.0173977	0	0	0	0.0297248	0	0	0
O94832	Unconventional myosin-Id	MYO1D	0	4.57256	4	116.1	9.39	0.0173977	0	0	0	0.0297248	0	0	0
Q4LE64	NUMA1 variant protein (Fragment)	NUMA1 variant protein	0	5.32768	8	238.7	5.81	0.0348507	0	0	0	0.0297248	0	0.121327	0.105929
J3KPS3	Fructose-bisphosphate aldolase	ALDOA	0	9.23913	3	39.8	8.09	0	0	0	0	0.0302099	0	0.309644	0.18434
P61513	60S ribosomal protein L37a	RPL37A	0	29.3478	2	10.3	10.43	0	0	0	0	0.0302099	0.0406364	0	0
J3KQE5	GTP-binding nuclear protein Ran (Fragment)	RAN	0	13.6752	3	26.8	9.58	0	0	0	0	0.0302099	0	0	0
K7ER00	Phenylalanine--tRNA ligase alpha subunit	FARSA	0	6.75182	3	62.4	7.84	0	0	0	0	0.0302273	0.0203182	0	0
A0A0S2Z492	DNA helicase	MCM3	0	3.12125	2	93.7	6.38	0	0	0	0	0.0302273	0	0	0
A0A0U1RQC9	Cellular tumor antigen p53	TP53	0	4.87805	2	45.9	7.2	0	0	0	0	0.0302273	0	0	0
A4D1G5	40S ribosomal protein S27	LOC392748	0	14.1892	2	16.9	9.55	0.0406701	0	0	0.0653056	0.0302273	0	0	0
J3KPP4	Cisplatin resistance-associated overexpressed protein, isoform CRA_b	LUC7L3	0	6.54397	2	58.2	9.92	0.0290313	0	0	0	0.035538	0	0	0
J3KQN4	60S ribosomal protein L36a	RPL36A	0	12.6761	2	16.4	10.43	0.0290364	0.0767702	0.0390691	0	0.035538	0.0323651	0	0
Q14247	Src substrate cortactin	CTTN	0	9.63636	4	61.5	5.4	0.0289811	0	0	0	0.0355554	0.0406364	0	0
Q96QS1	Tetraspanin-32	TSPAN32	0.003	4.6875	1	34.6	8.4	0	0	0	0	0.0360405	0	0	0
A0A140VK53	Testicular secretory protein Li 53		0	2.07122	4	299.4	12.06	0.0290364	0.0288667	0	0	0.0360579	0	0	0
Q96N67	Dedicator of cytokinesis protein 7	DOCK7	0	1.16822	2	242.4	6.8	0.0347954	0	0	0	0.0360579	0.0463618	0	0
P26038	Moesin	MSN	0	12.1317	7	67.8	6.4	0.0348507	0	0	0	0.0360579	0	0	0.171304
A0A024R2Q4	Ribosomal protein L15	RPL15	0	11.2745	2	24.1	11.62	0.0463787	0	0	0	0.0360579	0.0513297	0.033175	0
L0R588	Alternative protein C11orf48	C11orf48	0	16.3522	2	18.4	11.3	0.0521326	0	0	0.032275	0.0360579	0.0538756	0.154502	0.131203
Q13724	Mannosyl-oligosaccharide glucosidase	MOGS	0	3.94265	3	91.9	8.9	0	0	0	0	0.0360753	0	0	0
O95425	Supervillin	SVIL	0	3.74887	6	247.6	6.98	0.0289811	0.038396	0	0	0.0365777	0.0329612	0	0
B2R8Z8	cDNA, FLJ94136, highly similar to Homo sapiens synaptotagmin binding, cytoplasmic RNA interacting protein (SYNCRIP), mRNA		0	13.1621	7	69.6	8.76	0.063877	0	0	0	0.0365777	0	0	0
Q14444	Caprin-1	CAPRIN1	0	5.78279	4	78.3	5.25	0.0695958	0	0	0	0.0414034	0.0450082	0.0445477	0
P83731	60S ribosomal protein L24	RPL24	0	19.1083	3	17.8	11.25	0.0928479	0.0577334	0	0.0429417	0.0414034	0	0.255183	0.251959
B3KM36	cDNA FLJ10153 fis, clone HEMBA1003417, highly similar to BAG family molecular chaperone regulator 2		0	13.2701	3	23.7	6.7	0.03474	0.0288667	0	0	0.0418884	0	0	0
Q53G47	LUC7-like isoform b variant (Fragment)		0	16.1725	5	43.7	9.98	0.0405645	0	0	0	0.0418884	0.0374944	0	0
B5BU08	U2 small nuclear RNA auxillary factor 1 isoform a	U2AF1	0	8.75	2	27.9	8.54	0.0521428	0	0	0	0.0418884	0.0609547	0	0
F4ZW62	NF45		0	24.359	6	43	5.26	0.0985616	0	0	0	0.0418884	0.0463618	0	0
A0A024R4K3	Malate dehydrogenase	MDH2	0	25.1479	6	35.5	8.68	0.0870387	0	0.0515628	0	0.0423909	0.0329612	0.0549773	0.118167
A0A024R814	Ribosomal protein L7, isoform CRA_a	RPL7	0	16.9884	4	30.4	10.71	0.0927473	0.0288667	0	0.032275	0.0423909	0	0.0549773	0.0653746
P63104	14-3-3 protein zeta/delta	YWHAZ	0	20	4	27.7	4.79	0	0	0.0791016	0.043457	0.0424083	0.0203182	0	0
Q59EA2	Coronin (Fragment)		0	8.18363	4	56.3	8.19	0.0347451	0	0	0	0.0424083	0.0826266	0	0
F8W6H6	Unconventional myosin-Va	MYO5A	0	3.55795	5	215.2	8.51	0.0405543	0	0	0	0.0424083	0.0546331	0	0
E5KNY5	Leucine-rich PPR-motif containing	LRPPRC	0	3.01291	3	157.8	6.13	0.0406147	0	0	0	0.0424083	0	0	0
A0A024RBH2	Cytoskeleton-associated protein 4, isoform CRA_c	CKAP4	0	17.1096	7	66	5.92	0.0464844	0	0	0	0.0424083	0.0901778	0.0551905	0
A0A024RBE7	Thymopoietin, isoform CRA_c	TMPO	0	19.6035	6	50.6	9.38	0.0986622	0	0	0	0.0424083	0.0584088	0.0445477	0
Q9BZK3	Putative nascent polypeptide-associated complex subunit alpha-like protein	NACAP1	0	13.1455	2	23.3	4.59	0.0405594	0	0.064681	0	0.0424257	0.031769	0	0
Q549N0	Cofilin 2 (Muscle), isoform CRA_a	CFL2	0	18.6747	2	18.7	7.88	0	0.0479035	0.0521873	0	0.0429281	0	0	0
Q04837	Single-stranded DNA-binding protein, mitochondrial	SSBP1	0	43.2432	5	17.2	9.6	0.121884	0	0	0	0.0472165	0.0850485	0	0.120908
Q01844	RNA-binding protein EWS	EWSR1	0	8.07927	3	68.4	9.33	0.0521377	0	0	0	0.0477364	0.0520873	0.0549773	0
A0A087WTP3	Far upstream element-binding protein 2	KHSRP	0	11.1111	6	73	7.71	0.0580124	0.0288667	0	0	0.0477712	0.0380906	0	0
F8WAR4	MICOS complex subunit	CHCHD3	0	18.2573	5	27.7	6.64	0.0173977	0	0	0.0546389	0.0482388	0.0266397	0	0
A8K259	cDNA FLJ78501, highly similar to Homo sapiens serpin peptidase inhibitor, clade H (heat shock protein 47), member 1, (collagen binding protein 1) (SERPINH1), mRNA		0	15.5502	5	46.5	8.69	0.0521377	0	0	0	0.0482388	0.0380906	0.033175	0
Q00839	Heterogeneous nuclear ribonucleoprotein U	HNRNPU	0	9.69697	5	90.5	6	0.0812848	0	0.0906319	0.108522	0.0482388	0.0742313	0	0
P06396	Gelsolin	GSN	0	11.3811	6	85.6	6.28	0.0870387	0	0	0	0.0482388	0.0761436	0	0
P11940	Polyadenylate-binding protein 1	PABPC1	0	14.4654	8	70.6	9.5	0.133412	0	0	0	0.0482562	0.0799567	0.0670798	0
E9PB61	THO complex subunit 4	ALYREF	0	20.4545	3	27.5	11.05	0.0580175	0.0383742	0.0787626	0	0.0487413	0.0463618	0	0
E9PK25	Cofilin-1	CFL1	0	22.0588	3	22.7	8.34	0	0.0479035	0.0521873	0	0.0487587	0	0	0
Q16891	MICOS complex subunit MIC60	IMMT	0	12.1372	8	83.6	6.48	0.0406097	0.0675634	0	0.0965849	0.0487587	0.0444121	0	0
Q9BRT6	Protein LLP homolog	LLPH	0	29.4574	3	15.2	10.37	0.0638267	0	0	0	0.0487587	0.0323651	0	0.0661733
F4ZW66	NF110b		0	11.0245	8	95.7	8.81	0.115964	0	0	0	0.0487587	0.0704557	0	0
E7ETY2	Treacle protein	TCOF1	0	4.50269	5	152.2	8.85	0.0579469	0.0482259	0.0525262	0	0.0535843	0.0450082	0.210636	0.18434
Q13344	Fus-like protein (Fragment)		0	3.0303	2	53.3	9.42	0.0463234	0	0	0	0.0540694	0.0532795	0.143859	0.171455
Q59GK9	Ribosomal protein L21 variant (Fragment)		0	20.2454	2	18.9	10.54	0.0696963	0	0	0	0.0540868	0.0940774	0	0
P13010	X-ray repair cross-complementing protein 5	XRCC5	0	8.19672	5	82.7	5.81	0.069641	0	0.0515628	0	0.0541042	0.0406364	0.199567	0
P38159	RNA-binding motif protein, X chromosome	RBMX	0	14.8338	5	42.3	10.05	0.110095	0	0	0	0.0541042	0.0609922	0.221582	0.0912956
A0A024R5Z7	Annexin	ANXA2	0	23.3038	6	38.6	7.75	0.0580627	0	0.0521873	0.0429417	0.0545893	0.0501375	0.0984917	0.0790582
Q9HBB3	60S ribosomal protein L6		0	22.1453	5	32.9	10.58	0.0753598	0.0288667	0.0515628	0	0.0546067	0.116184	0.111111	0
P36542	ATP synthase subunit gamma, mitochondrial	ATP5C1	0	14.094	4	33	9.22	0.0290313	0	0	0	0.0594149	0	0	0.0784107
A0A0S2Z5H3	Clathrin interactor 1 isoform 2 (Fragment)	CLINT1	0	10.8865	5	70.3	6.58	0.0754101	0	0	0	0.0599	0.0260436	0	0
Q96HS1	Serine/threonine-protein phosphatase PGAM5, mitochondrial	PGAM5	0	10.7266	3	32	8.68	0.0638267	0	0	0	0.0599174	0	0	0
O43684	Mitotic checkpoint protein BUB3	BUB3	0	18.5976	5	37.1	6.84	0.0868828	0	0	0.0960696	0.0599348	0.0463618	0	0
P62424	60S ribosomal protein L7a	RPL7A	0	26.3158	7	30	10.61	0.1102	0.0479035	0	0.0747363	0.0652455	0.0951456	0.0767796	0.119462
J3KTL2	Serine/arginine-rich-splicing factor 1	SRSF1	0	35.5731	8	28.3	10.08	0.0927473	0	0	0	0.0657479	0.0773733	0.122057	0
A0A0S2Z491	Nucleophosmin isoform 2 (Fragment)	NPM1	0	26.5306	5	32.6	4.78	0.110145	0	0	0	0.0662852	0.0895817	0.0777226	0.0396047
Q05682	Caldesmon	CALD1	0	12.1059	8	93.2	5.66	0	0.162747	0	0.0973404	0.0667702	0.0741938	0	0
Q9NZI8	Insulin-like growth factor 2 mRNA-binding protein 1	IGF2BP1	0	15.5979	6	63.4	9.2	0.0637764	0	0	0	0.0667876	0.0558629	0	0
V9HWB8	Pyruvate kinase	HEL-S-30	0	23.3522	10	57.9	7.84	0.0522433	0.0386966	0	0	0.0673249	0.0647303	0.122484	0.0661733
B4DR52	Histone H2B		0	14.4578	2	18	10.32	0.052188	0	0	0	0.0720983	0.0877559	0	0.0396047
A8K9A4	cDNA FLJ75154, highly similar to Homo sapiens heterogeneous nuclear ribonucleoprotein C (C1/C2), mRNA		0	23.5294	7	33.6	5.14	0.144835	0	0	0	0.0720983	0.104051	0.1327	0.0663244
D3DTX6	Neurabin-2	PPP1R9B	0	11.7503	8	89.3	4.97	0.023212	0.0482042	0	0.0973404	0.0721157	0	0	0
Q92804	TATA-binding protein-associated factor 2N	TAF15	0	10.1351	3	61.8	8.02	0.0521377	0	0	0	0.0721157	0.0672762	0.143859	0.171455
A0A0S2Z4Z6	Serine/arginine repetitive matrix 1 isoform 2 (Fragment)	SRRM1	0	9.69499	5	103.9	11.84	0.0579571	0.0288667	0	0	0.0721331	0.0730016	0.220245	0.156821
A4D0V4	Capping protein (Actin filament) muscle Z-line, alpha 2	CAPZA2	0	17.1329	4	32.9	5.85	0.069641	0	0	0	0.0721331	0.0781309	0	0
A0A024R2K4	Leucine rich repeat (In FLII) interacting protein 2, isoform CRA_b	LRRFIP2	0	7.27763	4	84.1	6.98	0.104381	0	0	0.075732	0.0779463	0	0	0
A8K7N0	cDNA FLJ75556, highly similar to Homo sapiens ribosomal protein L14, mRNA		0	28.4404	5	23.6	10.84	0.0986271	0.0288667	0	0.0752167	0.0779637	0.0996413	0.242228	0.209613
P00558	Phosphoglycerate kinase 1	PGK1	0	25.6595	8	44.6	8.1	0.0811741	0	0	0	0.0784488	0.104771	0	0
O14654	Insulin receptor substrate 4	IRS4	0	14.0016	11	133.7	8.44	0.0695856	0	0	0	0.0833092	0.0672762	0	0
Q53SS8	Epididymis secretory protein Li 85	PCBP1	0	21.9101	6	37.5	7.09	0.063716	0	0.0390691	0.0427015	0.0838116	0.0386867	0.0656201	0
H0YKD8	60S ribosomal protein L28	RPL28	0	19.4118	5	19.1	11.46	0.104381	0	0	0	0.0838116	0.0698596	0	0
P62888	60S ribosomal protein L30	RPL30	0	49.5652	6	12.8	9.63	0.0812295	0.153261	0	0.128825	0.0842967	0.0990452	0.321837	0.341312
Q2M2I5	Keratin, type I cytoskeletal 24	KRT24	0	5.33333	3	55.1	4.96	0.0695303	0	0.143158	0.0968251	0.0847992	0.0856446	0.210726	0.302204
A0A024RDB4	Heterogeneous nuclear ribonucleoprotein D (AU-rich element RNA binding protein 1, 37kDa), isoform CRA_c	HNRPD	0	16.369	4	36.2	8.1	0.069641	0	0.064681	0	0.0901621	0.0933198	0.408743	0.277729
P62854	40S ribosomal protein S26	RPS26	0	20.8696	2	13	11	0.0695856	0.0386966	0.0781382	0	0.091167	0.112446	0.0885787	0.0793605
A0A024R321	Filamin B, beta (Actin binding protein 278), isoform CRA_a	FLNB	0	4.76735	9	280.3	5.94	0.0463838	0	0	0	0.0949703	0.0812729	0.033175	0
B3KSL5	cDNA FLJ36545 fis, clone TRACH2006670, highly similar to RNA-binding protein Luc7-like 2		0	18.1122	6	46.5	10.01	0.0927575	0	0	0	0.095438	0.0856821	0	0
P62861	40S ribosomal protein S30	FAU	0	33.8983	4	6.6	12.15	0.0580124	0.0681865	0	0	0.0964951	0.0532795	0.286989	0.345003
Q53H88	Dynactin 2 variant (Fragment)		0	23.399	7	44.8	5.12	0.0812746	0	0	0	0.101788	0.102225	0	0
Q13283	Ras GTPase-activating protein-binding protein 1	G3BP1	0	13.3047	4	52.1	5.52	0.14479	0.0288667	0	0	0.102308	0.139682	0	0
Q15366	Poly(rC)-binding protein 2	PCBP2	0	18.9041	5	38.6	6.79	0.0985667	0	0	0	0.102343	0.0710518	0.0779359	0.0792094
A0A0A0MTS2	Glucose-6-phosphate isomerase (Fragment)	GPI	0	12.9145	6	64.8	9.04	0.110256	0	0	0	0.102811	0.104771	0	0
Q6IPH7	RPL14 protein	RPL14	0	32.7273	6	23.8	10.93	0.0985769	0.0482042	0	0.032275	0.108191	0.0869983	0.164719	0.131699
M0QZM1	Heterogeneous nuclear ribonucleoprotein M (Fragment)	HNRNPM	0	37.5979	10	40	6.73	0.150805	0	0	0	0.108208	0.0838563	0	0
P28289	Tropomodulin-1	TMOD1	0	31.4763	8	40.5	5.1	0.0869935	0	0	0	0.114004	0	0	0
B2R7W4	cDNA, FLJ93632, highly similar to Homo sapiens heterogeneous nuclear ribonucleoprotein R (HNRPR), mRNA		0	13.5861	7	70.9	7.74	0.0986271	0	0	0	0.114039	0.114992	0	0
A0A024RAZ7	Heterogeneous nuclear ribonucleoprotein A1, isoform CRA_b	HNRPA1	0	21.7742	7	38.7	9.13	0.203058	0	0	0	0.115529	0.231176	0	0.0526408
P15924	Desmoplakin	DSP	0	5.64263	13	331.6	6.81	0.156423	0	0.0912564	0.0653056	0.120892	0.0984491	0	0.0798569
B2RA03	cDNA, FLJ94640, highly similar to Homo sapiens keratin 18 (KRT18), mRNA		0	16.5116	7	48	5.38	0.121774	0	0	0	0.12719	0.0920036	0.255577	0.0914468
Q15084	Protein disulfide-isomerase A6	PDIA6	0	21.1364	8	48.1	5.08	0.156534	0.038396	0	0	0.132518	0.103417	0.177461	0.329571
Q59GE4	Ribosomal protein S10 variant (Fragment)		0	19.5402	4	19.8	9.91	0.179685	0	0	0.032275	0.143729	0.168271	0	0
A8K9L8	cDNA FLJ76964, highly similar to Homo sapiens tropomodulin 2 (neuronal) (TMOD2), mRNA		0	13.9601	4	39.6	5.27	0.133412	0.0770709	0	0.0863987	0.144734	0.168867	0	0
B4DWA6	cDNA FLJ60094, highly similar to F-actin capping protein subunit beta		0	26.8657	9	37.5	6.14	0.145006	0	0	0	0.169096	0.129461	0	0
A0A0A0MRM8	Unconventional myosin-VI	MYO6	0	16.4405	16	144.9	8.56	0.19143	0.0865784	0	0	0.216815	0.238603	0	0
A0A087X0X3	Heterogeneous nuclear ribonucleoprotein M	HNRNPM	0	33.0137	18	77.5	8.78	0.353657	0	0	0.0427015	0.278361	0.25137	0.330077	0.209613
Q16643	Drebrin	DBN1	0	36.8259	19	71.4	4.45	0.359381	0.268985	0	0.162131	0.611996	0.444455	0	0
