# Supplementary material for: Identification of Inflammatory Proteomics Networks of Toll-like Receptor 4 through Immunoprecipitation-Based Chemical Cross-Linking Proteomics
Source: Proteomes. 2022 Sep 1;10(3):31. doi: 10.3390/proteomes10030031 (PMC9506174; doi:10.3390/proteomes10030031)
Supplement: Supplementary file 1 [file proteomes-10-00031-s001.zip › Supplementary-Table -S3.xlsx]

## Sheet: Sheet2
Supplementary Table S3a. Detailed information about list of exclusively identified proteins in HA-TLR4-HEK293T cells upon the treatment of LPS along with ETD cross-linker.
Accession	Description	Gene Name	Exp. q-value	Coverage	Peptides	MW [kDa]	Calc. pI
B3KMC9	cDNA FLJ10711 fis, clone NT2RP3000917, highly similar to 5'-3' exoribonuclease 2 (EC 3.1.11.-)	Not assigned	0	1.26316	1	108.5	7.47
O43290	U4/U6.U5 tri-snRNP-associated protein 1	SART1	0	4	2	90.2	6.13
O75179	Ankyrin repeat domain-containing protein 17	ANKRD17 PE	0	1.22935	2	274.1	6.52
P05198	Eukaryotic translation initiation factor 2 subunit 1	EIF2S1	0	8.57143	2	36.1	5.08
P12532	Creatine kinase U-type, mitochondrial	CKMT1A	0	5.03597	1	47	8.34
P30419	Glycylpeptide N-tetradecanoyltransferase 1	NMT1	0	2.62097	1	56.8	7.8
P39023	60S ribomal protein L3	RPL3	0.001	2.97767	1	46.1	10.18
P61158	Actin-related protein 3	ACTR3	0	7.6555	3	47.3	5.88
P61289	Proteasome activator complex subunit 3	PSME3	0	11.811	2	29.5	5.95
Q8IZA3	Histone H1oo	H1FOO	0.038	2.60116	1	35.8	11.27
Q9UJW0	Dynactin subunit 4	DCTN4	0	8.26087	3	52.3	7.34
Supplementary Table S3b. Detailed information about list of exclusively identified proteins in HA-TLR4-HEK293T cells upon the treatment of Statin along with ETD cross-linker
Accession	Description	Gene Name	Exp. q-value	Coverage	Peptides	MW [kDa]	Calc. pI
A8K401	Prohibitin, isoform CRA_a	PHB	0	15.4412	3	29.8	5.76
B2RB23	cDNA, FLJ95265, highly similar to Homo sapiens acetyl-Coenzyme A acyltransferase 2 (mitochondrial 3-oxoacyl-Coenzyme A thiolase) (ACAA2), nuclear gene encoding mitochondrial protein, mRNA	Not assigned	0	3.27456	1	42	8.25
B3KQ09	cDNA FLJ32577 fis, clone SPLEN2000255	Not assigned	0	6.10329	1	24.6	10.23
B8XCX8	EPC1/ASXL2b fusion protein	Not assigned	0.032	0.485961	1	201.7	8.53
H7C2N1	Prothymin alpha (Fragment)	PTMA	0	16.2162	3	15.8	4.23
P01833	Polymeric immunoglobulin receptor	PIGR	0	2.09424	1	83.2	5.74
P07737	Profilin-1	PFN1	0	31.4286	3	15	8.27
P12277	Creatine kinase B-type	CKB	0	24.147	6	42.6	5.59
P49006	MARCKS-related protein	MARCKSL1	0	14.359	2	19.5	4.67
Q15075	Early endome antigen 1	EEA1	0.042	0.496102	1	162.4	5.68
Q15254	Prothymin alpha	PTMA	0	22.2222	2	11.8	3.81
Q16629	Serine/arginine-rich splicing factor 7	SRSF7	0	10.9244	2	27.4	11.82
Q59H77	Chaperonin containing TCP1, subunit 3 (Gamma) variant (Fragment)	Not assigned	0	9.18544	5	63.5	6.43
Q7Z4V5	Hepatoma-derived growth factor-related protein 2	HDGFRP2	0	5.06706	2	74.3	7.49
Q9NR48	Histone-lysine N-methyltransferase ASH1L	ASH1L	0.039	0.639946	1	332.6	9.39
Supplementary Table S3c. Detailed information about list of exclusively identified proteins in HA-TLR4-HEK293T cells upon the treatment of Statin+LPS along with ETD cross-linker.
Accession	Description	Gene Name	Exp. q-value	Coverage	Peptides	MW [kDa]	Calc. pI
A8K401	Prohibitin, isoform CRA_a	PHB	0	15.4412	3	29.8	5.76
B2RB23	cDNA, FLJ95265, highly similar to Homo sapiens acetyl-Coenzyme A acyltransferase 2 (mitochondrial 3-oxoacyl-Coenzyme A thiolase) (ACAA2), nuclear gene encoding mitochondrial protein, mRNA	Not assigned	0	3.27456	1	42	8.25
C9IZQ1	Translocon-associated protein subunit alpha	SSR1	0	8.72483	2	33.9	4.69
H7C2N1	Prothymin alpha (Fragment)	PTMA	0	16.2162	3	15.8	4.23
P04279	Semenogelin-1	SEMG1	0	7.79221	3	52.1	9.29
P12277	Creatine kinase B-type	CKB	0	24.147	6	42.6	5.59
P29966	Myristoylated alanine-rich C-kinase substrate	MARCKS PE	0	15.0602	3	31.5	4.45
P49006	MARCKS-related protein	MARCKSL1	0	14.359	2	19.5	4.67
Q16629	Serine/arginine-rich splicing factor 7	SRSF7	0	10.9244	2	27.4	11.82
Q59H77	Chaperonin containing TCP1, subunit 3 (Gamma) variant (Fragment)	Not assigned	0	9.18544	5	63.5	6.43
