# Supplementary material for: Identification of Inflammatory Proteomics Networks of Toll-like Receptor 4 through Immunoprecipitation-Based Chemical Cross-Linking Proteomics
Source: Proteomes. 2022 Sep 1;10(3):31. doi: 10.3390/proteomes10030031 (PMC9506174; doi:10.3390/proteomes10030031)
Supplement: Supplementary file 1 [file proteomes-10-00031-s001.zip › Supplementary-Table -S4.xlsx]

## Sheet: Sheet1
Table S4 IPA network analysis of the proteomics data upon the treatment of LPS and Statin and Statin-LPS in HA-TLR4-HEK293T cells. This tables shows the classifications based on top diseases and functions including respective focused molecules that are involved in various functions.
ID	Analysis	Top Diseases and Functions	Focus Molecules	Molecules in Network
1	LPS	Protein Synthesis, Cancer, Cell Death and Survival	32	BAG2,CALM1 (includes others),DDX3X,DNAJA1,EEF1A1,FAU,HNRNPK,HSPA8,HSPA1A/HSPA1B,HSPD1,KRT17,mediator,NFkB (complex),PPP1CA,PPP1CB,PPP1CC,PPP1R9B,Rnr,RPLP2,RPS8,RPS9,RPS11,RPS14,RPS16,RPS17,RPS23,RPS25,RPS26,RPS28,RPS3A,TJP2,TUBA1B,TUBB6,TUBB4A,TUBB4B
2	LPS	Cancer, Organismal Injury and Abnormalities, Respiratory Disease	27	ACTA2,ACTN1,Alpha catenin,ATP1A1,CALD1,CAPZB,ERK1/2,HNRNPM,Hsp90,HSP90AB1,HSP90B1,HSPA5,HSPA6,LDL,Mlc,MPRIP,MYH9,MYH10,MYH14,MYL6,MYL12A,MYO1C,p85 (pik3r),PAWR,PCMT1,PPP1R12A,Ras homolog,Rock,RPS3,SERBP1,SF1,SFPQ,SPTAN1,TJP1,TUBA1C
3	LPS	Cell Death and Survival, Protein Synthesis, RNA Post-Transcriptional Modification	24	ACTB,Akt,CDK4/6,DDX17,DSP,ENO1,GAPDH,Gsk3,Histone h3,Histone h4,HNRNPC,HNRNPU,HRNR,MYO6,NCL,PARP,PARP1,PI3K (family),PKM,PTBP1,Ras,RNA polymerase II,RPA,RPL27A,RPS5,RPS6,SF3B2,SF3B3,TAGLN2,Top2,UQCRC2,XRCC6,YBX1,YWHAQ,YWHAZ
4	LPS	Cell-To-Cell Signaling and Interaction, Cancer, Organismal Injury and Abnormalities	19	ACTA1,Actin,BCAR1,CANX,CAPZA1,CDK1,E2f,ERK,estrogen receptor,F Actin,FLNA,FSH,HSP90AA1,IFN Beta,IgG,Interferon alpha,Jnk,Lh,LIMA1,LMO7,MAP2K1/2,MFAP1,P-TEFb,P38 MAPK,PI3K (complex),RBM17,RPL18,RPL23A,SF3A1,TCR,TLR4,TMOD3,TPM1,VIM,YBX3
5	LPS	Cancer, Cell Death and Survival, Organismal Injury and Abnormalities	19	ANG,ATAD3A,BASP1,CAPZA1,CPSF6,CSNK2A1,DBN1,GEMIN2,GEMIN4,GRB2,GSN,HNRNPA2B1,HNRNPU,HSPA5,HSPA9,IGF2BP1,LONP1,MAT2B,NPM1,NTRK3,PA2G4,RPL4,RPL9,RPL13,RPLP0,RPS18,RPS4X,SERBP1,SNRPD2,SPHK1,SSRP1,SUB1,SVIL,TRIM29,TUFM
6	LPS	Cellular Movement, Amino Acid Metabolism, Small Molecule Biochemistry	18	APOE,CCND1,CDK4/6,CLDN7,CSNK2A1,CUL4B,DNAJB6,EEF1B2,EGLN,ENO1,HDAC3,HIST1H1D,HLA-B,HSP90AA1,LARP1,LDHA,LDHB,LRRC59,MARCKS,NACA,PHGDH,PKM,PRKCZ,RAB11FIP5,RCN1,RPL10,RPL29,RPL31,RPTOR,TFF1,TPI1,TPM3,TUBA1B,TUFM,XPO1
7	LPS	Protein Synthesis, Cell Cycle, Humoral Immune Response	16	ACTC1,AGTR1,ATP5A1,ATP5B,BARD1,BCL2L1,CD3,EEF2,ESRRA,GRB2,HNRNPA3,HNRNPF,IL7,MAP3K1,MAP3K7,MAP3K14,MYOCD,NF2,PA2G4,PTPRC,Rnr,RPL11,RPL14,RPL19,RPL28,RPL30,RPS7,RPS4X,SPTBN1,SPTBN2,STAU1,TP53,TPM4
8	LPS	Cell Death and Survival, Cell Cycle, Cell Signaling	13	26s Proteasome,Alpha tubulin,BAX,BCL2,CEL,CELF2,CKAP2,DDX5,FIP1L1,GRK3,HNRNPAB,HSPA1L,IMMT,mir-26,MYBL1,NET1,PAK4,PARK7,PGAM5,PPP1CA,PRKG1,PRMT1,RAI14,REV1,RPL23,SFPQ,SLC25A5,TP53,TP53BP2,TPD52,TPT1,TUBB,TUBB4B,XPO1,YWHAG
9	LPS	Cancer, Organismal Injury and Abnormalities, Reproductive System Disease	13	ACTBL2,ACTN4,ARAF,CCNB1,Cofilin,DDX5,DGCR8,GSTA4,HMGA2,HNRNPH1,HNRNPK,HNRNPU,HRAS,IGF2BP1,let-7,LIN28A,mir-23,mir-24,mir-26,mir-30,mir-34,mir-342,MTBP,MYC,MYO18A,NUPR1,PDK1,PRDX1,PTMA,RCN2,RPL13,RPLP1,RPS15,SAMHD1,URI1
10	LPS	RNA Damage and Repair, Organismal Survival, Cell Death and Survival	1	FBL,TSR1
11	LPS	Connective Tissue Development and Function, Connective Tissue Disorders, Nervous System Development and Function	1	DVL3,LRRFIP2
12	LPS	Amino Acid Metabolism, Cancer, Carbohydrate Metabolism	1	HNF1A,TMOD2
13	LPS	Cell Cycle, Connective Tissue Development and Function, Connective Tissue Disorders	1	IRS1,PPP1R12C
14	LPS	Cardiovascular Disease, Organismal Injury and Abnormalities, Reproductive System Disease	1	RPL17,STOX1
ID	Analysis	Top Diseases and Functions	Focus Molecules	Molecules in Network
1	STATIN	Protein Synthesis, Cancer, Cell Death and Survival	32	BAG2,CALM1 (includes others),DDX3X,DNAJA1,EEF1A1,FAU,HNRNPK,HSPA8,HSPA1A/HSPA1B,HSPD1,KRT17,mediator,NFkB (complex),PPP1CA,PPP1CB,PPP1CC,PPP1R9B,Rnr,RPLP2,RPS8,RPS9,RPS11,RPS14,RPS16,RPS17,RPS23,RPS25,RPS26,RPS28,RPS3A,TJP2,TUBA1B,TUBB6,TUBB4A,TUBB4B
2	STATIN	Cancer, Organismal Injury and Abnormalities, Respiratory Disease	27	ACTA2,ACTN1,Alpha catenin,ATP1A1,CALD1,CAPZB,ERK1/2,HNRNPM,Hsp90,HSP90AB1,HSP90B1,HSPA5,HSPA6,LDL,Mlc,MPRIP,MYH9,MYH10,MYH14,MYL6,MYL12A,p85 (pik3r),PAWR,PCMT1,PPP1R12A,Ras homolog,Rock,RPS3,SERBP1,SF1,SFPQ,SPTAN1,TJP1,TUBA1C,YBX1
3	STATIN	Cancer, Cell Death and Survival, Organismal Injury and Abnormalities	25	Akt,CDK4/6,DDX17,DSP,ENO1,GAPDH,Gsk3,Histone h3,Histone h4,HRNR,MARCKS,MYO6,NCL,PARP,PARP1,PI3K (family),PKM,PTBP1,Ras,RCN1,RPA,RPL10,RPL13,RPL27A,RPS5,RPS6,SF3B2,SF3B3,Top2,TPI1,TUFM,UQCRC2,XRCC6,YWHAQ,YWHAZ
4	STATIN	DNA Replication, Recombination, and Repair, RNA Post-Transcriptional Modification, Cell-To-Cell Signaling and Interaction	22	ACTA1,ACTB,Actin,BCAR1,CANX,CAPZA1,CDK1,DDX5,ERK,F Actin,FLNA,HNRNPC,HNRNPU,IFN Beta,Interferon alpha,Jnk,Lh,LIMA1,LMO7,MAP2K1/2,P-TEFb,P38 MAPK,PI3K (complex),RBM17,RNA polymerase II,RPL18,RPL23A,SF3A1,TAGLN2,TCR,TLR4,TMOD3,TPM1,VIM,YBX3
5	STATIN	RNA Post-Transcriptional Modification, Cellular Assembly and Organization, Cancer	17	ATAD3A,BASP1,CPSF6,CSNK2A1,DDX20,DHX9,ERBB3,GEMIN2,GEMIN4,GRB2,HNRNPA2B1,HNRNPU,HSPA9,let-7,LONP1,MAT2B,mir-342,NF2,NTRK3,p85 (pik3r),PKM,RPL9,RPL13,RPL23,RPLP0,RPLP1,RPS15,RPS18,SATB1,SERBP1,SMN1/SMN2,SNRPD2,SSRP1,SUB1,TRIM29
6	STATIN	Protein Synthesis, Cell Cycle, Humoral Immune Response	15	ACTC1,AGTR1,ATP5A1,ATP5B,BARD1,EEF2,EGLN,EGLN1,ESRRA,GRB2,HNRNPA3,HNRNPF,IL7,MAP3K1,MAP3K14,MYOCD,PA2G4,RAB11FIP5,Rnr,RPL11,RPL14,RPL19,RPL28,RPL30,RPS7,RPS4X,STAU1,TP53,TPM4
7	STATIN	Cellular Movement, Cancer, Organismal Injury and Abnormalities	15	AKT3,ANXA1,BAG2,BAX,BCL2,CCNA1,CCND1,CELF2,CLDN7,CLU,estrogen receptor,Gsk3,HIST1H1D,HNRNPAB,HSP90AA1,HSPA1L,IMMT,LDHB,LRRC59,MAD2L1,mir-7,miR-34a-5p (and other miRNAs w/seed GGCAGUG),MT-CO2,NACA,NCOR1,NME1,PGAM5,PHGDH,RPL29,RPL31,RPTOR,SIRT1,TUFM,TWIST1,XRCC6
8	STATIN	Connective Tissue Development and Function, Tissue Development, Cell Death and Survival	13	ACTBL2,ACTN4,AGTR1,ANG,ARAF,BCL2L1,CCNA2,CCNB1,CDH1,CKAP2,DBN1,FIP1L1,FLNA,HNRNPH1,Hsp90,LIMA1,MPRIP,MYC,NCL,NF2,NONO,NPM1,PAK1,PTPRC,RAI14,RPL4,RUNX2,SFN,SPTBN1,SPTBN2,SVIL,THRA,TP53,YWHAE,YWHAG
9	STATIN	Cell Death and Survival, Hematological System Development and Function, Lymphoid Tissue Structure and Development	9	26s Proteasome,Alpha tubulin,E2f,E2F2,ESR2,FSH,HTT,IgG,ISG15,JUP,MFAP1,MIF,MYC,MYO18A,NCOA6,NFE2L2,NUPR1,PDK1,PI4K2A,PPP1R15A,PRDX1,PRNP,PTGS2,PTMA,RCN2,SFPQ,SKI,SLC25A5,SMARCE1,SRSF1,STAU1,TNFRSF10B,TP53BP1,TPM3,TUBB
10	STATIN	RNA Damage and Repair, Organismal Survival, Cell Death and Survival	1	FBL,TSR1
11	STATIN	Connective Tissue Development and Function, Connective Tissue Disorders, Nervous System Development and Function	1	DVL3,LRRFIP2
12	STATIN	Amino Acid Metabolism, Cancer, Carbohydrate Metabolism	1	HNF1A,TMOD2
13	STATIN	Cell Cycle, Connective Tissue Development and Function, Connective Tissue Disorders	1	IRS1,PPP1R12C
14	STATIN	Cardiovascular Disease, Organismal Injury and Abnormalities, Reproductive System Disease	1	RPL17,STOX1
ID	Analysis	Top Diseases and Functions	Focus Molecules	Molecules in Network
1	LPS+STATIN	Protein Synthesis, Cancer, Cell Death and Survival	32	BAG2,CALM1 (includes others),DDX3X,DNAJA1,EEF1A1,FAU,HNRNPK,HSPA8,HSPA1A/HSPA1B,HSPD1,KRT17,mediator,NFkB (complex),PPP1CA,PPP1CB,PPP1CC,PPP1R9B,Rnr,RPLP2,RPS8,RPS9,RPS11,RPS14,RPS16,RPS17,RPS23,RPS25,RPS26,RPS28,RPS3A,TJP2,TUBA1B,TUBB6,TUBB4A,TUBB4B
2	LPS+STATIN	Cancer, Organismal Injury and Abnormalities, Respiratory Disease	27	ACTA2,ACTN1,Alpha catenin,ATP1A1,CALD1,CAPZB,ERK1/2,HNRNPM,Hsp90,HSP90AB1,HSP90B1,HSPA5,HSPA6,LDL,Mlc,MPRIP,MYH9,MYH10,MYH14,MYL6,MYL12A,MYO1C,p85 (pik3r),PAWR,PCMT1,PPP1R12A,Ras homolog,Rock,RPS3,SERBP1,SF1,SFPQ,SPTAN1,TJP1,TUBA1C
3	LPS+STATIN	Cell Death and Survival, Protein Synthesis, RNA Post-Transcriptional Modification	24	ACTB,Akt,CDK4/6,DDX17,DSP,ENO1,GAPDH,Gsk3,Histone h3,Histone h4,HNRNPC,HNRNPU,HRNR,MYO6,NCL,PARP,PARP1,PI3K (family),PKM,PTBP1,Ras,RNA polymerase II,RPA,RPL27A,RPS5,RPS6,SF3B2,SF3B3,TAGLN2,Top2,UQCRC2,XRCC6,YBX1,YWHAQ,YWHAZ
4	LPS+STATIN	Cell-To-Cell Signaling and Interaction, Cancer, Organismal Injury and Abnormalities	19	ACTA1,Actin,BCAR1,CANX,CAPZA1,CDK1,E2f,ERK,estrogen receptor,F Actin,FLNA,FSH,HSP90AA1,IFN Beta,IgG,Interferon alpha,Jnk,Lh,LIMA1,LMO7,MAP2K1/2,MFAP1,P-TEFb,P38 MAPK,PI3K (complex),RBM17,RPL18,RPL23A,SF3A1,TCR,TLR4,TMOD3,TPM1,VIM,YBX3
5	LPS+STATIN	Cancer, Cell Death and Survival, Organismal Injury and Abnormalities	19	ANG,ATAD3A,BASP1,CAPZA1,CPSF6,CSNK2A1,DBN1,GEMIN2,GEMIN4,GRB2,GSN,HNRNPA2B1,HNRNPU,HSPA5,HSPA9,IGF2BP1,LONP1,MAT2B,NTRK3,p85 (pik3r),PA2G4,RPL4,RPL9,RPL13,RPLP0,RPS18,RPS4X,SERBP1,SMN1/SMN2,SNRPD2,SSRP1,SUB1,SVIL,TRIM29,TUFM
6	LPS+STATIN	Cellular Movement, Amino Acid Metabolism, Small Molecule Biochemistry	18	CCND1,CDK4/6,CLDN7,CSNK2A1,CUL4B,DNAJB6,EEF1B2,EGLN,ENO1,ETV5,HDAC3,HIST1H1D,HLA-B,HSP90AA1,LARP1,LDHA,LDHB,LRRC59,MARCKS,NACA,PHGDH,PKM,PRKCZ,RAB11FIP5,RAC1,RCN1,RPL10,RPL29,RPL31,RPTOR,TPI1,TPM3,TUBA1B,TUFM,XPO1
7	LPS+STATIN	Protein Synthesis, Cell Cycle, Humoral Immune Response	16	ACTC1,AGTR1,ATP5A1,ATP5B,BARD1,BCL2L1,CD3,EEF2,ESRRA,GRB2,HNRNPA3,HNRNPF,IL7,MAP3K1,MAP3K7,MAP3K14,MYOCD,NF2,PA2G4,PTPRC,Rnr,RPL11,RPL14,RPL19,RPL28,RPL30,RPS7,RPS4X,SPTBN1,SPTBN2,STAU1,TP53,TPM4
8	LPS+STATIN	Cell Death and Survival, Cancer, Endocrine System Disorders	14	26s Proteasome,Alpha tubulin,BAX,BCL2,CEL,CELF2,CKAP2,DDX5,FAF1,FIP1L1,GRK3,HIPK2,HNRNPAB,HSP90AA1,HSPA1L,IMMT,mir-26,MYBL1,NET1,PGAM5,PPP1CA,PRKG1,PRMT1,RAI14,REV1,RPL23,SFPQ,SLC25A5,TP53,TP53BP2,TPD52,TPT1,TUBB,TUBB4B,YWHAG
9	LPS+STATIN	Cancer, Organismal Injury and Abnormalities, Reproductive System Disease	13	ACTBL2,ACTN4,ARAF,AURKA,CCNB1,DDX5,DGCR8,GSTA4,HMGA2,HNRNPH1,HNRNPK,HNRNPU,HRAS,IGF2BP1,let-7,LIN28A,mir-23,mir-24,mir-26,mir-30,mir-34,mir-342,MTBP,MYC,MYO18A,NUPR1,PRDX1,PTMA,RCN2,RPL13,RPLP1,RPS15,SAMHD1,SRSF1,URI1
10	LPS+STATIN	RNA Damage and Repair, Organismal Survival, Cell Death and Survival	1	FBL,TSR1
11	LPS+STATIN	Connective Tissue Development and Function, Connective Tissue Disorders, Nervous System Development and Function	1	DVL3,LRRFIP2
12	LPS+STATIN	Amino Acid Metabolism, Cancer, Carbohydrate Metabolism	1	HNF1A,TMOD2
13	LPS+STATIN	Cell Cycle, Connective Tissue Development and Function, Connective Tissue Disorders	1	IRS1,PPP1R12C
14	LPS+STATIN	Cardiovascular Disease, Organismal Injury and Abnormalities, Reproductive System Disease	1	RPL17,STOX1
