# Supplementary material for: Identification of Inflammatory Proteomics Networks of Toll-like Receptor 4 through Immunoprecipitation-Based Chemical Cross-Linking Proteomics
Source: Proteomes. 2022 Sep 1;10(3):31. doi: 10.3390/proteomes10030031 (PMC9506174; doi:10.3390/proteomes10030031)
Supplement: Supplementary file 1 [file proteomes-10-00031-s001.zip › Supplementary-Table -S5.xlsx]

## Sheet: List >=1 Peptide
Supplementary Table S5. List of proteins expressed in each conditions.
Control	LPS	Statin	LPS-Statin	Control-XL	LPS-XL	Statin-XL	LPS-Statin-XL
B4DRM3	O00488	Q5H9N4	O00488	O95831	Q9BU76	Q9BU76	A0A0S2Z4Z9
A0A024RDF6	A0A140VK53	P09661	A0A024R814	Q9H9B4	K7ER00	A8K259	A0A0S2Z491
Q9BU76	B3KM36	A0A024RBF6	Q6IPH7	G9K388	P63104	P27348	B4DR52
F6N0C4	A0A0S2Z4Z6	P62318	Q00325	F8W7C6	Q00325	A0A024R2Q4	P04279
F8WAR4	A0A087WTP3	P62847	A0A0S2Z4Z9	H0YH81	P00338	A0A024R321	C9IZQ1
Q01449	Q6NVC0	P30050	P49207	P62917	Q9UHX1	P08708	J3KQY1
Q9H9B4	Q9HBB3	J3KQN4	L0R588	A0A087WZN1	B2RMV2	P37802	A0A024RAZ7
A0A087WZN1	A0A024R814	Q8N1C8	Q59GE4	P61626	Q5U077	A0A0S2Z471	M0QYS1
P61626	A8K7N0	Q53SS8	Q14240	Q92499	A0A024RDF6	Q15254	A0A024RBF6
I3L504	Q13283	A8K6V3	Q9HCM4	S4R3N1	F6N0C4	H9ZYJ2	A0A024R814
Q9BUP0	P55060	A0A024R1A3	Q53SS8	A0A024RDQ8	Q08J23	J3KQY1	S4R3N1
O94832	Q53GB0	Q6NVC0	A0A024R0M6	Q9NR30	A0A024RAI1	Q6UN15	P05387
P62318	A0A024RAC0	Q9HBB3	B2RBR9	Q9H2W6	P12532	M0QYS1	B4DRM3
B0AZQ4	P60174	P18077	A0A087X0X3	E7EVA0	Q9UBS4	P42166	H0Y4Z8
A8K486	A8K7D9	A0A024R608	A0A024R5Z7	B2R4V2	P05198	Q14444	P60174
P78371	P62917	A0A0U1RRH7	P83731	B2R761	P30419	A0A024RBE7	V9HWB8
Q14204	E9PB61	P13010	P00338	Q4VCS5	A0A024R203	P51991	Q9BRT6
A0A024R7M6	P04406	A0A024R4K3	P63104	A8K968	O43290	P12268	P00338
Q9UPQ0	O43795	P00338	O95831	Q5RKV6	C9J6P4	P01833	A8K9A4
A0A024RAM4	A0A140VKG2	E9KL35	B4DRM3	A6NEM2	B2RDP6	A0A024R4K3	Q5D862
A0A0S2Z4A5	O95425	Q549N0	Q9H9B4	Q32MZ4	Q9ULV0	Q01844	P36542
A8MYK1	P27348	E9PK25	Q9UHX1	Q9HC36	Q59G24	Q13435	Q16629
H7BZJ3	Q15084	Q92614	Q8WVX7	Q0ZGT2	A0A0S2Z5H3	A0A024R814	A0A024R5Z7
Q9HCY8	Q8WVX7	A0A024R5Z7	P13639	A0A0A0MRM9	B3KUJ0	Q15717	Q15366
P05109	A0A024R0M6	A0A024R0M6	B3KUJ0	P30101	H0Y2S9	A0A024RBH2	P62854
X6RAL5	Q5H9N4	E7ETY2	P16989	B5BUD2	B9EGI2	P30050	P15924
F8VXC8	O14639	Q53Z07	P62316	J3KNL6	O94973	Q7Z4V5	Q92522
P28290	V9HWB8	A8K0T9	P18077	P0DME0	A0A024R6W0	S4R3N1	P38159
Q9Y3F4	O95831	P29966	P04406	P62306	Q14203	B2RBR9	A0A024RBS2
Q7L0Y3	P62854	P49458	P31689	Q8N9Q2	A6NHL2	Q96AG4	B2RA03
Q14157	Q59GY2	P22695	P26368	B4DWA7	F8WAR4	Q53SS8	Q59EI9
Q5BKZ1	P09661	P12004	P55060	B2RDP6	O95831	A0A024R1M6	A0A0D9SF53
Q5D862	P35268	P23246	H9ZYJ2	I1E4Y6	P48047	A0A0S2Z4Z9	P27824
P12268	A0A0B7NNI9	P19474	Q2NL82	B2RBR9	Q9BZK3	P35268	Q99623
Q13045	Q09028	Q5HYL6	F8WAR4	B4DRM3	Q13045	Q59H77	Q9P0L0
P18077	A0A024RBF6	Q9BZK3	P55795	P18077	J3KQN4	A6NHL2	Q6UN15
A8K517	P62424	A0A024RDB4	A0A024RBF6	A8K7D9	Q9BRT6	Q59EI9	P23246
B4DWA7	Q549N0	P55060	P06733	A0A0B7NNI9	P62280	H0YH81	A8K401
Q9BZL4	E9PK25	P27348	P12004	Q13151	P18077	A0A024RBF6	Q08J23
O00488	P22695	Q8WVX7	P23246	P12273	P12273	P11940	P23396
P26368	D3DTX6	Q6UN15	Q53G49	O14602	O95425	A8K401	A0A024RDF6
A8K521	B7Z4C8	P62979	Q59G24	P23284	A0A024R4K3	P23396	Q4LE64
A0A024R2T6	P03243	P46781	Q14257	J3KQY1	Q01449	P62424	A8K9C4
D3DSQ0	Q6IPH7	E7EMB3	Q8WWI1	Q9Y3U8	P14625	P49207	P26373
H0Y4Z8	Q00325	P37802	P15924	Q9ULV0	O95782	A0A0S2Z491	A0A024R4K3
P29401	B3KUJ0	Q96T67	A4D1G5	A0A0S2Z4Z9	B4DLN1	Q99623	H0YH81
Q92499	P62318	Q5U077	A0A024R608	P49207	Q96GA3	Q15366	Q562Z4
D3DTX6	P31689	Q59GY2	O43795	Q9BZL4	K7ELC2	Q53G49	Q562V5
Q96CT7	Q53G49	P35268	Q9BU76	A8K651	P22695	B7Z4C8	Q562L9
P99999	E7ETY2	P62854	Q96T67	P51991	Q53G47	P26373	V9GZ17
Q08211	P62277	P55795	P62424	Q92522	P13639	B2RB23	P62424
Q8NF37	P06733	Q53G49	P30050	Q6UN15	A0A087WTP3	Q08J23	Q04837
B0YJ88	P62847	E9PB61	A0A024R1N4	E9KL35	A8K259	P62854	P06733
Q08945	P13639	Q6ZN40	A8K7N0	O00159	B2R8R5	Q2NL82	L0R588
S4R3N1	P12004	P63104	P62277	Q6NVC0	P08238	A0A024R5Z7	Q53G49
O94973	Q15459	G9K388	P60174	Q0KKI6	Q53SS8	A0A0D9SF53	Q6IPH7
P31689	P30050	B3KXM2	Q15459	P07900	P31689	P00338	Q6NVC0
B4E0L0	A8K651	P49411	Q6ZN40	P62244	A0A087WVQ6	Q9Y3U8	Q9UHX1
Q9Y3Y2	P18077	A6NHL2	G9K388	I3L504	P42166	P62249	B7Z4C8
Q13242	P83731	B4DJM5	P81605	Q13045	P61513	Q92522	B2RB23
A0A087WVQ6	P62979	Q00839	B7Z4C8	Q6PJJ2	Q14247	Q9HBB3	P46781
F8W7C6	Q6UN15	H7BY58	A0A024R2K4	B2R8R5	P13010	Q562Z4	P05787
V9HWK0	H7C2N1	P62277	Q53F64	A7BI36	A8K517	Q562V5	P62081
P15880	O15020	Q8WWI1	A0A0U1RRH7	F8W930	Q562R0	Q562L9	A0A0S2Z4Z6
B2RBR9	P62244	P13639	Q53Z07	Q9BU76	Q16891	Q4LE64	Q5EC54
A0A024RDQ8	Q59G24	P15924	Q6IPI1	Q9BUP0	Q14444	Q0KKI6	J3KTA4
P62244	A0A024R1N4	P60866	P62847	O94832	E7ETY2	A0A0U1RRH7	Q53GG0
Q6PJJ2	Q13435	P26373	P27348	Q4LE64	P27824	J3KTL2	P68366
J3QR44	Q16891	A0A024R4Q8	Q6UN15	A6NHL2	Q96N67	P60174	P26038
Q9H444	Q6IPI1	Q6IPI1	A0A024RBS2	J3KPS3	F4ZW62	V9HWB8	P62249
A0A024R7U6	Q96T67	Q9BZL4	Q13435	P61513	P27348	P07737	Q13344
A0A024RBB7	A0A024R608	J3KN67	J3QQ67	J3KQE5	E9PB61	A8K9A4	Q92804
A0A0S2Z4Z9	P62861	B2R4R9	A8K9L8	A4D1G5	O43684	P23246	H7C2N1
P27824	Q14257	Q0KKI6	P05787	K7ER00	A0A087WUZ3	Q13344	A0A024R1Q8
P49207	F8W7C6	A0A024RBS2	P22695	A0A0S2Z492	A0A024QZK8	Q92804	E7ETY2
B2RMV2	J3KQN4	H9ZYJ2	O43684	A0A0U1RQC9	A0A024R5Z7	V9GZ17	J3KPS3
O95425	P14625	P03243	Q16891	J3KQN4	P46781	A0A024RBS2	E9PAV3
Q14247	Q53F64	Q2NL82	P60866	J3KPP4	B2R4C0	P05387	A8K4W0
A0A087WUZ3	A8K9L8	P05787	Q2M2I5	Q14247	A0A024R2Q4	L0R588	A0A0U1RRH7
Q13435	P23246	Q53F64	Q9BZL4	P22695	Q6NVC0	A0A024RDF6	A8K7N0
B2R4C0	A0A024RBS2	A0A024R1N4	P03243	Q96QS1	Q01844	O43175	A0A087X0X3
P36542	Q5EC54	O43175	P14625	L0R588	B2R4P2	P46781	Q59GY2
Q9NR30	Q8N1C8	Q13435	D3DTX6	Q13435	P61163	Q6IPH7	P14625
J3KPP4	B2R4P2	P04406	Q05682	A0A140VK53	P16989	Q86YZ3	Q2NL82
B2R6J2	A0A0U1RRH7	P42766	Q6NVC0	Q96N67	D3DUK1	Q6NVC0	A0A024R4Q8
P27708	A0A0A0MRM8	K7ELC2	Q8N1C8	P26038	Q13344	Q53GG0	P67809
J3KQN4	K7ELC2	P67936	Q0KKI6	A0A024R2Q4	P62861	A8K9C4	Q53F64
A0A140VK53	B2R4R9	P05387	Q16630	Q13724	L0R588	P62750	D3DQ70
P60174	P81605	Q5EC54	B2R4R9	Q53G49	O00159	Q59GY2	Q59F66
B3KM36	E7EMB3	F8W0W8	A0A0C4DG17	O95425	F8W6H6	Q15084	Q5JR94
Q13151	P10809	Q59G24	B2R4P2	B2R8Z8	Q9NZI8	B4DRM3	P19338
Q59EA2	Q6ZN40	F8W7C6	F8W7C6	P83731	Q13151	P16989	J3QRS3
A8K7D9	J3KN67	P81605	P62979	Q14444	B3KXM2	P62081	B2R4P2
Q13185	D3DQ70	J3QQ67	B4DE59	B3KM36	Q53G49	P13010	P49006
P14625	H7BY58	D3DQ70	Q00839	Q53G47	P29401	E7ETY2	P62917
Q9H2W6	P55795	Q2M2I5	J3KN67	B5BU08	A0A024RBE7	Q2M2I5	P83731
A0A024RBF6	P42766	P16989	Q86YZ3	F4ZW62	Q02413	A0A0S2Z4Z6	B2R5W3
Q9UHX1	P60866	Q16630	P67809	P03243	P62277	P29966	J3QQ67
P51991	J3QQ67	P60174	P42766	A0A024R814	Q96T67	P38159	P55795
P12273	Q2NL82	P22626	G3V1L9	A0A024R4K3	B5BU08	P62917	G8JLB6
Q96N67	Q8WWI1	P06733	Q59GY2	P63104	P38159	P68366	A0A024RDB4
B4DJM5	P19474	Q86Y46	P10809	Q59EA2	Q92522	P04406	Q2M2I5
P48047	Q53Z07	B4DE59	Q5EC54	F8W6H6	V9HWB8	J3KTA4	P29966
P62280	O43175	Q53GG0	P62888	E5KNY5	Q92804	B2R5W3	A0A0C4DG17
O75947	P26373	P62081	H7BY58	A0A024RBH2	O14654	Q7Z406	B4DE59
Q4LE64	P22626	P19338	A6NHL2	A0A024RBE7	F8W0W8	A8K7N0	Q9BYX7
P26038	P46781	P14625	P26373	Q9BZK3	H0YKD8	H7C2N1	P22626
O95782	Q0KKI6	H0YH81	P46781	Q549N0	F4ZW66	A0A024R1Q8	P14649
O00159	A0A0C4DG17	P21333	A0A024R4Q8	Q04837	B2R4R9	Q5JR94	Q15084
O14602	G3V1L9	P62280	H0YH81	Q59G24	A0A0U1RRH7	P49006	Q86YZ3
B4DLN1	A6NHL2	B7Z596	P19474	P27348	Q15366	P14625	P23284
F8W6H6	Q9BU76	A0A0C4DG17	P67936	Q01844	P46776	P83731	P62888
A0A024R6W0	Q86YZ3	Q86YZ3	Q86Y46	B2R4P2	P62081	B2RA03	P62861
Q9BZK3	P62081	A0A024R7T3	Q5HYL6	A0A087WTP3	A7BI36	A8K4W0	Q562R1
A8K329	Q16630	G8JLB6	K7ELC2	F8WAR4	A0A0S2Z4Z6	Q59F66	P62701
P27348	Q5HYL6	P55081	P62081	Q00839	P26599	P62701	P07900
P22695	A8K0T9	P67809	Q96I25	A8K259	Q05682	P62861	P21333
Q53G47	P16989	B2R4P2	G8JLB6	P06396	Q00839	A0A0C4DG17	P55081
B7Z4C8	A2A3R6	Q96I25	P22626	B2RAH5	P10809	P23284	Q04695
A6NHL2	P62280	Q96IZ0	P62280	P11940	V9HW04	P14649	P04406
B2R8R5	O43707	A3R0T7	Q16643	E9PB61	P06396	A0A024R4Q8	A0A024R1N4
Q16891	Q5JR94	A2A3R6	P04259	Q16891	B4DE59	D3DQ70	P08238
E7EVA0	P49411	A8K9C4	P05387	P23396	J3KTL2	P19338	Q8N1C8
B7Z809	A0A024R4Q8	V9HW04	O43175	E9PK25	A4D0V4	Q53F64	Q9BUF5
Q59EI9	A0A024R7T3	A8K517	A8K9C4	Q9BRT6	A0A0C4DG17	E9PAV3	Q6IPI1
Q15717	Q86Y46	P10809	P46776	F4ZW66	P11940	J3KPS3	Q7Z406
Q96AG4	Q9BZL4	V9HW26	Q5JR94	A0A024R608	A0A024R321	B2R4P2	P10809
Q0KKI6	P05787	Q5JR94	A0A0A6YYL6	P62280	Q59EA2	P62888	B7Z6Z4
E5KNY5	P62888	P46776	A0A024R7T3	A8K9C4	B2RAH5	B4DE59	P62750
P62917	B4DE59	A0A0A6YYL6	A8K0T9	E7ETY2	P04406	J3QQ67	P46776
Q99623	P62750	B2R5W3	Q04695	P16989	M0QZM1	A0A087X0X3	P62913
Q14498	Q96I25	P14649	E7EMB3	A0A024RBF6	Q04837	J3QRS3	P42766
A4D1G5	P46776	P62249	A8K517	Q13344	Q2M2I5	P55795	P81605
H0YH81	A3R0T7	A0A1B0GTL5	P62249	P23246	B3KSL5	G8JLB6	Q8WVX7
Q13344	H0YH81	J3KTA4	V9HW26	P62277	Q6IPH7	P46776	Q16630
A7BI36	A8K517	A0A087WUZ3	Q53GG0	Q6ZN40	B4DR52	Q8N1C8	V9HW22
Q08J23	Q05682	Q562M5	D3DQ70	Q59GK9	Q6ZN40	Q5EC54	D1CS55
A0A024R2Q4	P67936	Q59F66	P49411	P13010	P62249	P10809	B1PS43
A0A024R321	D3DUK1	P23396	B3KXM2	P38159	P06733	D1CS55	Q86Y46
A0A0U1RRH7	V9HW26	A0A0D9SF53	B7Z596	A0A024R5Z7	A0A0S2Z491	Q6IPI1	P62263
Q92522	G8JLB6	Q7Z406	A2A3R6	Q9HBB3	A0A024RBH2	Q04695	B2R6X5
A8K9C4	P55081	A8K4W0	P19338	P08238	P23396	P55081	P62851
Q14203	P62249	P62750	B2R5W3	P36542	P42766	P81605	V9HW26
Q96GA3	A0A1B0GTL5	P07900	P14649	A0A0S2Z5H3	B2RA03	P62913	P0CG38
Q59G24	P05387	Q13813	Q92614	Q96HS1	A0A024RDB4	B7Z6Z4	P13647
A0A024RBH2	P04259	D3DUK1	Q96IZ0	O43684	Q59GK9	P07900	B4DI54
G3V1L9	P07900	A0A0S2Z4G4	P62750	A2A3R6	P62424	A0A024RDB4	A3R0T7
L0R588	B7Z596	V9GZ17	J3KTA4	P62424	Q53F64	P21333	P04350
Q92804	P14649	E9PAV3	A3R0T7	A0A0U1RRH7	P62979	P08238	E7EVS6
A8K259	A8K9C4	P08238	F8W0W8	J3KTL2	Q16630	Q86Y46	V9HWE1
Q01844	P19338	P62851	P55081	P62081	P15924	P05787	Q9BVA1
B5BU08	P67809	B2RMV2	A8K4W0	P27824	P62888	P42766	B4DWU6
Q562R0	A8K4W0	P62913	P07900	A0A0S2Z491	P05387	Q16630	Q0IIN1
B4DR52	Q59F66	P08708	Q59F66	Q05682	A8K7N0	Q8WVX7	P04259
D3DUK1	A0A0A6YYL6	P27824	E9PAV3	Q6IPI1	Q59GY2	P67809	B3KML9
P62081	P08238	J3QRS3	P62913	K7ELC2	Q53H88	Q9BUF5	V9HWB4
V9HWB8	B2R5W3	Q9BUF5	A0A1B0GTL5	Q9NZI8	Q15084	Q9BYX7	P35580
A8MXP9	A0A0D9SF53	B7Z6Z4	D3DUK1	V9HWB8	A8K9A4	B1PS43	A0A0S2Z428
Q53G49	B3KXM2	P62269	B4DWU6	Q96T67	P55081	P62263	Q71U36
O95831	F8W0W8	V9HWB4	A0A0S2Z428	B4DR52	P00558	P22626	F5H5D3
P23284	Q53GG0	Q0IIN1	P23396	A8K9A4	A0A0A0MTS2	P62851	Q8IWP6
P26599	Q04695	D1CS55	A0A0D9SF53	D3DTX6	Q6IPI1	A0A024R1N4	A0A0G2JIW1
E7ETY2	Q96IZ0	B1PS43	V9HW04	Q92804	A2A3R6	P13647	P07437
A0A0S2Z4Z6	Q7Z406	P62701	Q0IIN1	A0A0S2Z4Z6	Q92614	V9HW26	P08779
P23246	J3KTA4	P68366	P27824	A4D0V4	P62750	B4DWU6	Q13707
P03243	Q16643	P62263	P08238	A0A087WUZ3	P62854	Q562R1	P68133
Q86UE4	E9PAV3	Q562Z4	A0A0S2Z4G4	J3QQ67	Q5EC54	A3R0T7	P68032
P62861	B2RMV2	Q562V5	P62851	A0A024R2K4	Q53Z07	P0CG38	P62269
A0A087WTP3	P23396	B2R6X5	P13647	P67936	J3QQ67	V9HW22	P02533
E9PB61	B4DWU6	Q562L9	B2RMV2	A8K7N0	B2R7W4	A0A0S2Z428	P35579
A0A024R5Z7	A0A0S2Z4G4	B2RAH5	P62269	P00558	Q9HBB3	B2R6X5	B4DW52
P16989	A0A0S2Z428	Q04695	P08708	P46781	V9GZ17	E7EVS6	P35908
Q53SS8	V9HW04	P04259	V9GZ17	A0A0C4DG17	B4DWA6	P04259	P13645
B3KXM2	B7Z6Z4	V9HW22	Q562M5	O14654	Q2NL82	Q0IIN1	P35527
Q02413	P62851	P04350	Q7Z406	Q2NL82	A3R0T7	P04350	H6VRG1
K7ELC2	P62913	H0Y2S9	V9HWB4	Q53SS8	P55795	Q9BVA1
Q9NZI8	Q0IIN1	P0CG38	P62263	H0YKD8	P62263	P62269
Q9BRT6	V9GZ17	B4DI54	B7Z6Z4	P62888	B7Z596	B3KML9
Q96HS1	P08708	V9HWE1	A0A087WUZ3	Q2M2I5	Q13283	Q71U36
B2R8Z8	P27824	P13647	P21333	B4DE59	J3KN67	F5H5D3
A0A024QZK8	P13647	B4DWU6	P08779	P10809	P22626	P35580
V9HW04	B2R6X5	P08779	P62701	Q5EC54	P67809	B4DI54
Q2M2I5	P62269	A0A0S2Z428	Q13813	B7Z596	P05787	P02533
P62854	V9HWB4	A0A024R1Q8	P02533	B3KXM2	E9PAV3	P08779
P37802	P62263	Q9P0K7	Q9BUF5	A0A024RDB4	Q8N1C8	Q8IWP6
O14654	J3QRS3	Q9BYX7	B2R6X5	B2R4R9	P62851	V9HWB4
P61163	V9HW22	Q9BVA1	D1CS55	P62854	J3KTA4	P07437
Q6NVC0	Q9BUF5	B3KML9	J3QRS3	A0A024R321	P67936	P35579
Q14444	B4DI54	Q8IWP6	Q562V5	B3KSL5	P26373	Q13707
O43175	Q562M5	P02533	Q562Z4	P62263	P49411	P68133
A0A024RDB4	P62701	B9EGI2	V9HWE1	P62861	Q13813	P68032
P42166	P08779	F5H5D3	Q562L9	Q59GY2	A0A0A6YYL6	A0A0G2JIW1
P13010	Q92614	Q71U36	H0Y2S9	Q53H88	A0A0D9SF53	B4DW52
A4D0V4	D1CS55	A0A0G2JIW1	V9HW22	Q13283	P62847	P35908
Q59GK9	P02533	P07437	B4DI54	P05387	Q59GE4	P13645
A0A024R608	P68366	Q562R1	A0A024R1Q8	Q53F64	A8K9L8	P35527
Q9HBB3	B1PS43	P35908	P68366	Q15366	P81605	V9HWE1
B2R4R9	A0A0G2JIW1	E7EVS6	P35908	A0A0A0MTS2	P30050	H6VRG1
A0A0S2Z5H3	P35908	P35579	B2RAH5	Q13813	Q8WVX7
P62277	A0A024R1Q8	Q13707	B1PS43	P55795	A0A024R1Q8
P08238	A0A087WUZ3	P35527	P0CG38	F8W0W8	P62913
B2R4P2	Q13813	P68032	B9EGI2	P62249	D1CS55
Q96T67	H0Y2S9	P68133	Q9P0K7	Q6IPH7	P08708
P00558	P04350	P13645	P04350	M0QZM1	Q5JR94
F8W0W8	Q562Z4	P35580	A0A0G2JIW1	P06733	Q59F66
P62888	Q562V5	B4DW52	F5H5D3	P04406	B2R5W3
Q53H88	B2RAH5	H6VRG1	Q9BVA1	P28289	A8K0T9
Q00839	Q562L9		Q71U36	J3KTA4	D3DQ70
O43684	F5H5D3		Q9BYX7	B2R7W4	A0A024R1N4
Q6ZN40	Q71U36		B3KML9	V9HW04	Q9BUF5
P28289	Q9BVA1		Q8IWP6	D3DUK1	A0A0S2Z4G4
A0A024R4K3	P21333		P13645	A0A024RAZ7	Q86Y46
Q53F64	B3KML9		P35527	A0A0D9SF53	A0A024RAZ7
P06396	P0CG38		P07437	P81605	V9HW26
D3DRX6	Q9P0K7		E7EVS6	P15924	A0A0A0MRM8
A0A024R814	Q8IWP6		Q562R1	A0A0A6YYL6	G8JLB6
J3KTL2	B9EGI2		H6VRG1	J3KN67	A0A087X0X3
P46776	V9HWE1		Q13707	B2RA03	A0A024R7T3
B3KSL5	P35527		P35580	P49411	A8K4W0
J3QQ67	P13645		P35579	P46776	Q86YZ3
P23396	P07437		P68133	Q15084	V9HW22
P83731	Q9BYX7		P68032	P67809	B2R6X5
B2RAH5	P35579		B4DW52	Q59F66	Q04695
P10809	H6VRG1			P05787	A0A024RBS2
P46781	E7EVS6			Q59GE4	P14649
F4ZW62	Q562R1			P62979	A0A024R4Q8
Q15366	P35580			A8K9L8	Q562Z4
Q6IPI1	Q13707			P62847	P19338
P42766	P68133			P30050	Q5HYL6
Q53Z07	P68032			P62913	Q0IIN1
Q6IPH7	B4DW52			Q53Z07	P62701
Q13813				V9GZ17	P13647
A8K7N0				P62750	Q562V5
A0A0C4DG17				A3R0T7	P04259
B2R7W4				A0A0S2Z4G4	P62269
A0A024RBE7				D1CS55	B4DI54
Q92614				Q92614	Q16643
H0YKD8				B4DWA6	P68366
A0A024R2K4				G8JLB6	Q53GG0
P06733				Q8WVX7	Q562L9
P38159				A0A024R1Q8	B4DWU6
A0A0S2Z491				A0A024R1N4	P08779
P04406				P42766	P04350
P62424				Q5JR94	A0A0S2Z428
A0A0A0MTS2				E9PAV3	B7Z6Z4
F4ZW66				Q86Y46	Q9BVA1
P62249				P55081	Q8IWP6
P62979				P26373	Q71U36
Q5EC54				P62851	V9HWB4
B7Z596				D3DQ70	P21333
B2RA03				A8K0T9	B3KML9
Q04837				Q04695	Q562M5
A2A3R6				Q16630	A0A0G2JIW1
Q2NL82				A0A024R7T3	P02533
P67936				Q8N1C8	P0CG38
P62263				V9HW26	F5H5D3
B4DE59				A0A0A0MRM8	P07437
P11940				P14649	V9HWE1
A8K9L8				A0A024RBS2	P35908
P62750				P08708	Q7Z406
P67809				A8K4W0	P13645
P55081				P22626	J3QRS3
Q13283				P19338	P35527
A8K9A4				B2R5W3	B1PS43
B4DWA6				Q86YZ3	E7EVS6
P49411				P62701	Q9BYX7
P62847				A0A087X0X3	H6VRG1
J3KN67				Q9BUF5	Q562R1
M0QZM1				Q0IIN1	Q13707
P05387				A0A024R4Q8	P68133
P62913				B2R6X5	P68032
P15924				Q562Z4	P35580
Q15084				P68366	B4DW52
E9PAV3				B4DWU6	P35579
P81605				Q5HYL6
P55795				B7Z6Z4
P62851				P13647
A0A0A6YYL6				A0A0S2Z428
P08708				P04259
D1CS55				V9HW22
A8K0T9				Q562V5
D3DQ70				P08779
Q59GY2				Q562L9
Q16630				B4DI54
Q59GE4				P62269
Q86Y46				P04350
V9GZ17				Q16643
P05787				Q562M5
A0A0D9SF53				Q9BVA1
Q8N1C8				P02533
A0A0A0MRM8				Q71U36
V9HW26				Q53GG0
P26373				Q8IWP6
P30050				F5H5D3
Q5JR94				B3KML9
A0A024RAZ7				A0A0G2JIW1
Q8WVX7				P21333
A0A0S2Z4G4				P07437
A3R0T7				P35908
A0A024R1Q8				V9HWB4
A0A024R7T3				P0CG38
J3KTA4				Q7Z406
A0A024RBS2				B1PS43
G8JLB6				V9HWE1
Q86YZ3				J3QRS3
Q59F66				P13645
P22626				P35527
P14649				Q9BYX7
Q04695				E7EVS6
A8K4W0				H6VRG1
P62701				Q562R1
A0A024R4Q8				P35580
Q5HYL6				Q13707
A0A024R1N4				P68133
P19338				P68032
Q562Z4				P35579
A0A087X0X3				B4DW52
B2R6X5
Q9BUF5
Q16643
Q562V5
B2R5W3
Q0IIN1
P04259
B4DWU6
A0A0S2Z428
V9HW22
Q562L9
P13647
Q53GG0
B7Z6Z4
P08779
P68366
B4DI54
P62269
Q562M5
P04350
Q71U36
P02533
P21333
A0A0G2JIW1
F5H5D3
Q8IWP6
B3KML9
Q9BVA1
P0CG38
V9HWB4
P35908
P07437
Q7Z406
P35527
J3QRS3
V9HWE1
B1PS43
Q9BYX7
P13645
E7EVS6
H6VRG1
Q562R1
Q13707
P68133
P68032
P35580
B4DW52
P35579
