# Supplementary material for: Identification of Inflammatory Proteomics Networks of Toll-like Receptor 4 through Immunoprecipitation-Based Chemical Cross-Linking Proteomics
Source: Proteomes. 2022 Sep 1;10(3):31. doi: 10.3390/proteomes10030031 (PMC9506174; doi:10.3390/proteomes10030031)
Supplement: Supplementary file 1 [file proteomes-10-00031-s001.zip › Supplementary-Table -S6.xlsx]

## Sheet: Supplementary Table S6
Table S6. The gene ontology functional classification of the number of proteins identified across different treamtment condition.
Functional Classes	Subcatagories	Control	LPS	Statin	LPS-Statin
Molecular Function	Binding	85	42	44	47
	Catalytic Activity	26	12	13	9
	Molecular Function Regulator	6	0	2	1
	Structural Molecule Activity	45	24	24	31
	Transcription Regulator Activity	3	0	1	2
	Translation Regulator Activity	1	1	0	0
	Transporter Activity	5	0	2	0
Biological Process	Biological Adhesion	1	1	1	0
	Biological Regulation	14	8	9	8
	Cellular Component Organization	12	7	7	6
	Cellular Process	57	30	31	31
	Developmental Process	7	2	1	1
	Immune System Process	1	1	1	1
	Localization	22	7	9	6
	Metabolic Process	48	21	21	22
	Multicellular Organismal Process	13	5	4	3
	Response To Stimulus	9	4	7	3
Cellular Components	Supramolecular Complex	1	0	0	0
	Protein-containing Complex	18	6	9	6
	Organelle	47	22	21	20
	Extracellular Region	2	2	2	2
	Cell Part	67	33	34	38
	Cell Junction	2	1	1	0
* CCOOB	Cellular Component Organization Or Biogenesis
*TRRAP	Transmembrane Receptor Regulatory/Adaptor Protein
