# Supplementary material for: Identification of Inflammatory Proteomics Networks of Toll-like Receptor 4 through Immunoprecipitation-Based Chemical Cross-Linking Proteomics
Source: Proteomes. 2022 Sep 1;10(3):31. doi: 10.3390/proteomes10030031 (PMC9506174; doi:10.3390/proteomes10030031)
Supplement: Supplementary file 1 [file proteomes-10-00031-s001.zip › Supplementary-Table -S7.xlsx]

## Sheet: Proteoforms
Table S7a. Detailed information about list of identified Proteoforms in HEK293 cells upon treatment with Statin and/or LPS, alone or in combination with or without cross-linker (XL)
Accession	Description	Gene Name	Exp. q-value	Coverage	Peptides	PSMs	Protein Groups	MW [kDa]	calc. pI	Control PSMs			Control Nor. PSMs			Control	SD Value	LPS PSMs			LPS Nor. PSMs			LPS	SD Value	Statin-PSMs			Statin Nor. PSMs			Statin	SD Value	LPS-Statin-PSMs			LPS-StatinNor. PSMs			Statin-LPS	SD Value	Control XL PSMs			Control XL Nor. PSMs			Control-XL	SD Value
										R1	R2	R3	R1	R2	R3			R1	R2	R3	R1	R2	R3			R1	R2	R3	R1	R2	R3			R1	R2	R3	R1	R2	R3			R1	R2	R3	R1	R2	R3
A0A024R1N4	X-ray repair complementing defective repair in Chinese hamster cells 6 (Ku autoantigen, 70kDa), isoform CRA_a	XRCC6	0	30.2135	16	227	1	69.8	6.64	22	13	22	0.384078	0.226757	0.380425	0.33042	0.0897933	3	2	2	0.0857633	0.0570451	0.0589797	0.0672627	0.0160512	2	5	2	0.0787092	0.187406	0.0807428	0.115619	0.0621776	2	2	3	0.0670916	0.0625586	0.096	0.0752167	0.018141	10	10	10	0.175439	0.190512	0.174917	0.180289	0.00885735
B5BU08	U2 small nuclear RNA auxillary factor 1 isoform a	U2AF1	0	8.75	2	35	1	27.9	8.54	3	2	4	0.0523743	0.0348857	0.0691683	0.0521428	0.0171424																									2	2	3	0.0350877	0.0381025	0.0524751	0.0418884	0.00929139
A0A0S2Z4G4	Tropomyosin 3 isoform 1 (Fragment)	TPM3	0	39.1129	11	190	1	29	4.78	13	11	13	0.226955	0.191872	0.224797	0.214541	0.0196621	11	13	11	0.314465	0.370793	0.324388	0.336549	0.0300684	9	7	8	0.354191	0.262369	0.322971	0.313177	0.0466882	13	12	8	0.436095	0.375352	0.256	0.355816	0.0916233	8	9	9	0.140351	0.171461	0.157425	0.156412	0.0155799
Q6ZN40	Tropomyosin 1 (Alpha), isoform CRA_f	TPM1	0	15.6442	5	60	1	37.4	4.72	5	4	6	0.0872905	0.0697715	0.103752	0.0869381	0.0169932	3	5	2	0.0857633	0.142613	0.0589797	0.0957852	0.0427077	2	1	3	0.0787092	0.0374813	0.121114	0.0791016	0.0418179	3	2	2	0.100637	0.0625586	0.064	0.075732	0.0215807	3	3	3	0.0526316	0.0571537	0.0524751	0.0540868	0.0026572
A0A024R0M6	Translocase of inner mitochondrial membrane 50 homolog (Yeast), isoform CRA_b	TIMM50	0	5.26316	2	17	1	50.4	9.42									2	1	1	0.0571755	0.0285225	0.0294898	0.038396	0.0162708	1	1	2	0.0393546	0.0374813	0.0807428	0.0525262	0.0244542	1	2	1	0.0335458	0.0625586	0.032	0.0427015	0.0172142
G3V1L9	Tight junction protein 1 (Zona occludens 1), isoform CRA_a	TJP1	0	6.3914	10	43	1	197.3	6.67	3	1	5	0.0523743	0.0174429	0.0864603	0.0520925	0.0345096	5	3	4	0.142939	0.0855676	0.117959	0.115489	0.0287653									4	3	4	0.134183	0.093838	0.128	0.118674	0.0217294
A0A024RBE7	Thymopoietin, isoform CRA_c	TMPO	0	19.6035	6	40	1	50.6	9.38	4	9	4	0.0698324	0.156986	0.0691683	0.0986622	0.0505109																									2	3	2	0.0350877	0.0571537	0.0349834	0.0424083	0.0127701
A0A024R355	Three prime histone mRNA exonuclease 1, isoform CRA_b	THEX1	0.002	4.29799	1	5	1	40	6.7
Q59F99	Staufen isoform b variant (Fragment)		0	4.90694	2	4	1	64.7	9.42
A0A024R8U5	Splicing factor, arginine/serine-rich 2, isoform CRA_a	SFRS2	0	11.3122	2	2	1	25.5	11.85
D3DR65	SPFH domain family, member 1, isoform CRA_a	SPFH1	0.002	3.44828	1	1	1	39.1	7.87
A0A024QYY9	Spectrin domain with coiled-coils 1, isoform CRA_a	SPECC1	0	2.05993	2	5	1	118.5	6.7
D3DQ70	SERPINE1 mRNA binding protein 1, isoform CRA_d	SERBP1	0	14.4086	5	179	1	50.9	9.33	9	11	10	0.157123	0.191872	0.172921	0.173972	0.0173982	3	5	2	0.0857633	0.142613	0.0589797	0.0957852	0.0427077	3	5	3	0.118064	0.187406	0.121114	0.142195	0.039184	6	7	6	0.201275	0.218955	0.192	0.204077	0.0136943	11	13	9	0.192982	0.247666	0.157425	0.199358	0.0454571
A0A0S2Z4Z6	Serine/arginine repetitive matrix 1 isoform 2 (Fragment)	SRRM1	0	9.69499	5	73	1	103.9	11.84	3	3	4	0.0523743	0.0523286	0.0691683	0.0579571	0.0097092	1	1	1	0.0285878	0.0285225	0.0294898	0.0288667	0.000540621																	5	4	3	0.0877193	0.076205	0.0524751	0.0721331	0.0179715
P31153	S-adenosylmethionine synthase isoform type-2	MAT2A	0.007	3.79747	1	4	1	43.6	6.48
A0A0A0MR66	RNA binding motif protein 10, isoform CRA_d	RBM10	0	3.71859	3	3	1	110.3	6.28
A0A024R608	Ribosomal protein, large, P1, isoform CRA_a	RPLP1	0	28.9474	2	45	1	11.5	4.32	3	5	5	0.0523743	0.0872144	0.0864603	0.0753497	0.0199008	2	1	4	0.0571755	0.0285225	0.117959	0.0678858	0.0456702	1	2	1	0.0393546	0.0749625	0.0403714	0.0515628	0.0202711	4	1	1	0.134183	0.0312793	0.032	0.0658208	0.0592046	4	2	3	0.0701754	0.0381025	0.0524751	0.0535843	0.0160652
A0A024R4Q8	Ribosomal protein S5, isoform CRA_a	RPS5	0	41.6667	8	232	1	22.9	9.72	18	18	18	0.314246	0.313972	0.311257	0.313158	0.00165209	3	8	4	0.0857633	0.22818	0.117959	0.143968	0.0746858	2	2	3	0.0787092	0.0749625	0.121114	0.0915953	0.0256327	6	3	3	0.201275	0.093838	0.096	0.130371	0.061414	15	19	20	0.263158	0.361974	0.349834	0.324988	0.0538898
A8K517	Ribosomal protein S23, isoform CRA_a	RPS23	0	23.7762	3	66	1	15.8	10.49	1	1	2	0.0174581	0.0174429	0.0345841	0.0231617	0.00989211	5	4	7	0.142939	0.11409	0.206429	0.154486	0.0472399	6	4	8	0.236128	0.149925	0.322971	0.236341	0.0865233	6	7	5	0.201275	0.218955	0.16	0.19341	0.0302543
A0A024R814	Ribosomal protein L7, isoform CRA_a	RPL7	0	16.9884	4	51	1	30.4	10.71	4	6	6	0.0698324	0.104657	0.103752	0.0927473	0.0198501	1	1	1	0.0285878	0.0285225	0.0294898	0.0288667	0.000540621									1	1	1	0.0335458	0.0312793	0.032	0.032275	0.00115799	1	3	3	0.0175439	0.0571537	0.0524751	0.0423909	0.0216449
A0A024R8P8	Ribosomal protein L38, isoform CRA_a	RPL38	0.002	18.5714	1	1	1	8.2	10.1
A0A024R1Q8	Ribosomal protein L23, isoform CRA_b	RPL23	0	52.8571	6	407	1	14.9	10.51	12	12	14	0.209497	0.209314	0.242089	0.2203	0.0188698	28	39	33	0.800457	1.11238	0.973164	0.962	0.15626	35	30	32	1.37741	1.12444	1.29189	1.26458	0.128678	25	26	29	0.838645	0.813262	0.928	0.859969	0.0602679	6	11	12	0.105263	0.209564	0.2099	0.174909	0.0603154
B5BUD2	Replication factor C 2 isoform 1 (Fragment)	RFC2	0	8.47458	2	6	1	39.2	6.44																																	1	1	1	0.0175439	0.0190512	0.0174917	0.0180289	0.000885735
A0A024RDQ8	Replication factor C (Activator 1) 3, 38kDa, isoform CRA_a	RFC3	0	7.86517	2	10	1	40.5	8.34	1	2	2	0.0174581	0.0348857	0.0345841	0.028976	0.00997593																									1	1	1	0.0175439	0.0190512	0.0174917	0.0180289	0.000885735
A0A024RDE5	Ras-GTPase activating protein SH3 domain-binding protein 2, isoform CRA_a	G3BP2	0	6.84647	2	7	1	54.1	5.55
A0A024R136	Rac GTPase activating protein 1, isoform CRA_a	RACGAP1	0.002	2.53165	1	3	1	71	8.88
A0A024R203	Proteasome (Prosome, macropain) activator subunit 3 (PA28 gamma Ki), isoform CRA_a	PSME3	0	11.3208	2	5	1	30.9	6.71
A8K401	Prohibitin, isoform CRA_a	PHB	0	15.4412	3	23	1	29.8	5.76
A0A0S2Z556	Polyglutamine binding protein 1 isoform 2 (Fragment)	PQBP1	0.004	4.27046	1	1	1	32.2	6.34
D3DSQ0	Pericentriolar material 1, isoform CRA_a	PCM1	0	1.58103	3	5	1	228.4	5.02	1	1	2	0.0174581	0.0174429	0.0345841	0.0231617	0.00989211
A0A024R6W2	Nudix (Nucleoside diphosphate linked moiety X)-type motif 21, isoform CRA_a	NUDT21	0	19.3833	4	12	1	26.2	8.82
A0A024RBB7	Nucleosome assembly protein 1-like 1, isoform CRA_a	NAP1L1	0.002	4.34783	1	10	1	45.3	4.46	1	2	2	0.0174581	0.0348857	0.0345841	0.028976	0.00997593
A0A024QZW7	Nucleoporin 153kDa, isoform CRA_a	NUP153	0.002	0.881356	1	1	1	153.9	8.73
A0A0S2Z491	Nucleophosmin isoform 2 (Fragment)	NPM1	0	26.5306	5	60	1	32.6	4.78	5	7	7	0.0872905	0.1221	0.121044	0.110145	0.0197996																									4	4	3	0.0701754	0.076205	0.0524751	0.0662852	0.012334
A0A024R8R4	Nuclear protein localization 4 homolog (S. cerevisiae), isoform CRA_a	NPLOC4	0.002	2.96053	1	1	1	68.1	6.38
A0A0S2Z4Z9	Non-POU domain containing octamer-binding isoform 1 (Fragment)	NONO	0	9.97877	5	28	1	54.2	8.95	2	1	2	0.0349162	0.0174429	0.0345841	0.0289811	0.00999375																	1	1	1	0.0335458	0.0312793	0.032	0.032275	0.00115799	1	2	1	0.0175439	0.0381025	0.0174917	0.0243793	0.0118846
Q01449	Myosin regulatory light chain 2, atrial isoform	MYL7	0.002	5.71429	1	11	1	19.4	4.88	1	1	1	0.0174581	0.0174429	0.0172921	0.0173977	9.17828e-05
B1PS43	Myosin heavy chain 11 smooth muscle isoform	MYH11	0	10.5964	25	1109	1	234.1	5.8	90	97	102	1.57123	1.69196	1.76379	1.67566	0.0973099	22	27	24	0.628931	0.770108	0.707756	0.702265	0.0707488	21	14	15	0.826446	0.524738	0.605571	0.652252	0.156177	32	34	29	1.07347	1.0635	0.928	1.02165	0.0812598	73	73	72	1.2807	1.39074	1.2594	1.31028	0.0704892
A0A024RAM4	Microtubule-associated protein 1B, isoform CRA_b	MAP1B	0	1.01297	2	6	1	270.5	4.81	1	1	1	0.0174581	0.0174429	0.0172921	0.0173977	9.17828e-05
Q53G47	LUC7-like isoform b variant (Fragment)		0	16.1725	5	24	1	43.7	9.98	3	1	3	0.0523743	0.0174429	0.0518762	0.0405645	0.0200254																									2	2	3	0.0350877	0.0381025	0.0524751	0.0418884	0.00929139
A0A024R1S8	LIM and SH3 protein 1, isoform CRA_b	LASP1	0.002	10.3448	2	2	1	29.7	7.05
A0A024RAC0	Leucine zipper protein 1, isoform CRA_a	LUZP1	0	6.41264	5	12	1	120.2	8.63									1	1	1	0.0285878	0.0285225	0.0294898	0.0288667	0.000540621
A0A024R2K4	Leucine rich repeat (In FLII) interacting protein 2, isoform CRA_b	LRRFIP2	0	7.27763	4	51	1	84.1	6.98	5	7	6	0.0872905	0.1221	0.103752	0.104381	0.0174133																	3	2	2	0.100637	0.0625586	0.064	0.075732	0.0215807	4	4	5	0.0701754	0.076205	0.0874585	0.0779463	0.0087721
A0A0S2Z3Y1	Lectin galactoside-binding soluble 3 binding protein isoform 1 (Fragment)	LGALS3BP	0.002	2.22222	1	2	1	65.3	5.27
P42166	Lamina-associated polypeptide 2, isoform alpha	TMPO	0	13.6888	6	29	1	75.4	7.66	4	5	3	0.0698324	0.0872144	0.0518762	0.069641	0.0176699
A0A024QZK8	Heterogeneous nuclear ribonucleoprotein H3 (2H9), isoform CRA_a	HNRPH3	0	8.67052	2	24	1	36.9	6.87	4	2	6	0.0698324	0.0348857	0.103752	0.0694902	0.0344346
A0A024R7T3	Heterogeneous nuclear ribonucleoprotein F, isoform CRA_a	HNRPF	0	18.3133	5	161	1	45.6	5.58	13	12	14	0.226955	0.209314	0.242089	0.22612	0.0164032	6	5	4	0.171527	0.142613	0.117959	0.144033	0.0268119	6	7	3	0.236128	0.262369	0.121114	0.206537	0.0751327	5	6	6	0.167729	0.187676	0.192	0.182468	0.0129465	11	10	14	0.192982	0.190512	0.244884	0.20946	0.0307031
A0A024RDF6	Heterogeneous nuclear ribonucleoprotein D-like, isoform CRA_a	HNRPDL	0	6.19048	2	37	1	46.4	9.57	1	1	1	0.0174581	0.0174429	0.0172921	0.0173977	9.17828e-05
A0A024RDB4	Heterogeneous nuclear ribonucleoprotein D (AU-rich element RNA binding protein 1, 37kDa), isoform CRA_c	HNRPD	0	16.369	4	108	1	36.2	8.1	4	5	3	0.0698324	0.0872144	0.0518762	0.069641	0.0176699									2	2	1	0.0787092	0.0749625	0.0403714	0.064681	0.0211359									6	5	4	0.105263	0.0952562	0.0699668	0.0901621	0.0181913
Q53F64	Heterogeneous nuclear ribonucleoprotein AB isoform a variant (Fragment)		0	13.8554	4	113	1	36	7.42	5	6	4	0.0872905	0.104657	0.0691683	0.0870387	0.0177458	2	3	3	0.0571755	0.0855676	0.0884695	0.0770709	0.0172909	5	1	2	0.196773	0.0374813	0.0807428	0.104999	0.0823695	3	1	3	0.100637	0.0312793	0.096	0.0759722	0.0387746	6	6	5	0.105263	0.114307	0.0874585	0.102343	0.0136606
A0A024RAZ7	Heterogeneous nuclear ribonucleoprotein A1, isoform CRA_b	HNRPA1	0	21.7742	7	99	1	38.7	9.13	12	13	10	0.209497	0.226757	0.172921	0.203058	0.0274899																									4	9	6	0.0701754	0.171461	0.10495	0.115529	0.0514649
A0A024RBF6	HCG26523, isoform CRA_a	hCG_26523	0	12.4138	3	41	1	17.3	10.2	2	2	2	0.0349162	0.0348857	0.0345841	0.0347954	0.000183566	2	2	1	0.0571755	0.0570451	0.0294898	0.0479035	0.0159468	1	1	1	0.0393546	0.0374813	0.0403714	0.0390691	0.00146608	1	3	2	0.0335458	0.093838	0.064	0.0637946	0.0301466	2	3	4	0.0350877	0.0571537	0.0699668	0.0540694	0.0176429
A0A0S2Z428	HCG2039812, isoform CRA_b (Fragment)	KRT6A	0	46.2766	24	572	1	60	8	27	26	20	0.471369	0.453515	0.345841	0.423575	0.0679086	13	11	11	0.371641	0.313748	0.324388	0.336592	0.0308157	31	40	25	1.21999	1.49925	1.00929	1.24284	0.24578	13	8	8	0.436095	0.250235	0.256	0.31411	0.105682	23	23	22	0.403509	0.438179	0.384817	0.408835	0.0270765
A0A024R9P1	HCG2026745, isoform CRA_a	hCG_2026745	0	4.91803	1	2	1	34.1	11.81
X5DR09	General transcription factor IIi isoform A (Fragment)	GTF2I	0	2.80561	2	4	1	112.3	6.39
A0A024R7M6	GATA zinc finger domain containing 2A, isoform CRA_a	GATAD2A	0.003	1.73502	1	6	1	68.1	9.94	1	1	1	0.0174581	0.0174429	0.0172921	0.0173977	9.17828e-05
X5D907	Fragile X mental retardation 1 isoform C (Fragment)	FMR1	0.002	2.52525	1	1	1	66.9	7.23
A0A024R321	Filamin B, beta (Actin binding protein 278), isoform CRA_a	FLNB	0	4.76735	9	48	1	280.3	5.94	4	1	3	0.0698324	0.0174429	0.0518762	0.0463838	0.0266231																									7	3	6	0.122807	0.0571537	0.10495	0.0949703	0.0339453
A0A024R3W7	Eukaryotic translation elongation factor 1 beta 2, isoform CRA_a	EEF1B2	0.002	5.77778	1	5	1	24.7	4.67
A0A024R2T6	DEAH (Asp-Glu-Ala-His) box polypeptide 30, isoform CRA_b	DHX30	0	3.18258	3	4	1	133.9	8.78	1	1	2	0.0174581	0.0174429	0.0345841	0.0231617	0.00989211
Q59F66	DEAD box polypeptide 17 isoform p82 variant (Fragment)		0	17.7748	11	212	1	81	7.93	16	16	14	0.27933	0.279086	0.242089	0.266835	0.021431	6	6	10	0.171527	0.171135	0.294898	0.21252	0.0713419	5	10	7	0.196773	0.374813	0.2826	0.284728	0.0890389	8	8	11	0.268366	0.250235	0.352	0.2902	0.0542825	8	9	6	0.140351	0.171461	0.10495	0.138921	0.0332786
A0A024RBH2	Cytoskeleton-associated protein 4, isoform CRA_c	CKAP4	0	17.1096	7	40	1	66	5.92	4	3	1	0.0698324	0.0523286	0.0172921	0.0464844	0.0267533																									2	3	2	0.0350877	0.0571537	0.0349834	0.0424083	0.0127701
A0A024R880	Cyclin-dependent kinase 9 (CDC2-related kinase), isoform CRA_a	CDK9	0	6.72043	2	2	1	42.8	8.79
A0A0S2Z471	Creatine kinase brain isoform 2 (Fragment)	CKB	0	19.5062	5	16	1	44.9	6.11
Q549N0	Cofilin 2 (Muscle), isoform CRA_a	CFL2	0	18.6747	2	21	1	18.7	7.88									2	2	1	0.0571755	0.0570451	0.0294898	0.0479035	0.0159468	2	1	1	0.0787092	0.0374813	0.0403714	0.0521873	0.023014									2	4	1	0.0350877	0.076205	0.0174917	0.0429281	0.0301317
A0A0S2Z5H3	Clathrin interactor 1 isoform 2 (Fragment)	CLINT1	0	10.8865	5	27	1	70.3	6.58	5	4	4	0.0872905	0.0697715	0.0691683	0.0754101	0.0102932																									2	3	5	0.0350877	0.0571537	0.0874585	0.0599	0.0262932
J3KPP4	Cisplatin resistance-associated overexpressed protein, isoform CRA_b	LUC7L3	0	6.54397	2	22	1	58.2	9.92	2	2	1	0.0349162	0.0348857	0.0172921	0.0290313	0.0101665																									2	1	3	0.0350877	0.0190512	0.0524751	0.035538	0.0167165
H0Y4Z8	Chromosome 9 open reading frame 86, isoform CRA_b	RABL6	0	6.57534	3	19	1	79.6	5.22	1	2	1	0.0174581	0.0348857	0.0172921	0.023212	0.0101101
A8K4W2	cDNA FLJ78635, highly similar to Homo sapiens ATP synthase, H+ transporting, mitochondrial F0 complex, subunit b, isoform 1 (ATP5F1), transcript variant 1, mRNA		0.002	4.6875	1	11	1	28.9	9.36
A0A024QZC1	CD2 antigen (Cytoplasmic tail) binding protein 2, isoform CRA_a	CD2BP2	0.005	4.10557	1	3	1	37.6	4.61
D3DUK1	Breast cancer anti-estrogen resistance 1, isoform CRA_a	BCAR1	0	16.7793	10	106	1	95.1	5.74	3	3	3	0.0523743	0.0523286	0.0518762	0.052193	0.000275348	6	6	5	0.171527	0.171135	0.147449	0.16337	0.0137895	6	10	8	0.236128	0.374813	0.322971	0.311304	0.0700749	12	10	7	0.402549	0.312793	0.224	0.313114	0.0892752	6	7	6	0.105263	0.133359	0.10495	0.114524	0.0163121
A0A024RAI1	ARP3 actin-related protein 3 homolog (Yeast), isoform CRA_a	ACTR3	0	5.02392	2	8	1	47.3	5.88
Q59EI9	ADP,ATP carrier protein, liver isoform T2 variant (Fragment)		0	13.9319	4	33	1	35.4	9.85	3	2	2	0.0523743	0.0348857	0.0345841	0.0406147	0.0101852
Q59EC0	Adenosine deaminase, RNA-specific isoform ADAR-a variant (Fragment)		0.003	1.20579	1	1	1	137.7	8.48
P62701	40S ribosomal protein S4, X isoform	RPS4X	0	35.3612	9	367	1	29.6	10.15	16	18	17	0.27933	0.313972	0.293965	0.295755	0.0173903	20	18	17	0.571755	0.513406	0.501327	0.528829	0.0376624	17	18	16	0.669028	0.674663	0.645943	0.663211	0.015218	18	15	23	0.603824	0.46919	0.736	0.603005	0.133407	14	15	17	0.245614	0.285769	0.297359	0.276247	0.0271546
[truncated: 43 more columns]

## Sheet: Unique without XL
Table S7b. Detailed information about list of identified unique proteoforms in HEK293 cells upon treatment with Statin and/or LPS, alone or in combination without cross-linker (XL)
Accession	Description	Gene Name	Exp. q-value	Coverage	Peptides	PSMs	Protein Groups	MW [kDa]	calc. pI	Control PSMs			Control Nor. PSMs			Control	SD Value	LPS PSMs			LPS Nor. PSMs			LPS	SD Value	Statin-PSMs			Statin Nor. PSMs			Statin	SD Value	LPS-Statin-PSMs			LPS-StatinNor. PSMs			Statin-LPS	SD Value	Control XL PSMs			Control XL Nor. PSMs			Control-XL	SD Value
										R1	R2	R3	R1	R2	R3			R1	R2	R3	R1	R2	R3			R1	R2	R3	R1	R2	R3			R1	R2	R3	R1	R2	R3			R1	R2	R3	R1	R2	R3
A0A024R1N4	X-ray repair complementing defective repair in Chinese hamster cells 6 (Ku autoantigen, 70kDa), isoform CRA_a	XRCC6	0	30.2135	16	227	1	69.8	6.64	22	13	22	0.384078	0.226757	0.380425	0.33042	0.0897933	3	2	2	0.0857633	0.0570451	0.0589797	0.0672627	0.0160512	2	5	2	0.0787092	0.187406	0.0807428	0.115619	0.0621776	2	2	3	0.0670916	0.0625586	0.096	0.0752167	0.018141	10	10	10	0.175439	0.190512	0.174917	0.180289	0.00885735
A0A0S2Z4G4	Tropomyosin 3 isoform 1 (Fragment)	TPM3	0	39.1129	11	190	1	29	4.78	13	11	13	0.226955	0.191872	0.224797	0.214541	0.0196621	11	13	11	0.314465	0.370793	0.324388	0.336549	0.0300684	9	7	8	0.354191	0.262369	0.322971	0.313177	0.0466882	13	12	8	0.436095	0.375352	0.256	0.355816	0.0916233	8	9	9	0.140351	0.171461	0.157425	0.156412	0.0155799
Q6ZN40	Tropomyosin 1 (Alpha), isoform CRA_f	TPM1	0	15.6442	5	60	1	37.4	4.72	5	4	6	0.0872905	0.0697715	0.103752	0.0869381	0.0169932	3	5	2	0.0857633	0.142613	0.0589797	0.0957852	0.0427077	2	1	3	0.0787092	0.0374813	0.121114	0.0791016	0.0418179	3	2	2	0.100637	0.0625586	0.064	0.075732	0.0215807	3	3	3	0.0526316	0.0571537	0.0524751	0.0540868	0.0026572
D3DQ70	SERPINE1 mRNA binding protein 1, isoform CRA_d	SERBP1	0	14.4086	5	179	1	50.9	9.33	9	11	10	0.157123	0.191872	0.172921	0.173972	0.0173982	3	5	2	0.0857633	0.142613	0.0589797	0.0957852	0.0427077	3	5	3	0.118064	0.187406	0.121114	0.142195	0.039184	6	7	6	0.201275	0.218955	0.192	0.204077	0.0136943	11	13	9	0.192982	0.247666	0.157425	0.199358	0.0454571
A0A024R608	Ribosomal protein, large, P1, isoform CRA_a	RPLP1	0	28.9474	2	45	1	11.5	4.32	3	5	5	0.0523743	0.0872144	0.0864603	0.0753497	0.0199008	2	1	4	0.0571755	0.0285225	0.117959	0.0678858	0.0456702	1	2	1	0.0393546	0.0749625	0.0403714	0.0515628	0.0202711	4	1	1	0.134183	0.0312793	0.032	0.0658208	0.0592046	4	2	3	0.0701754	0.0381025	0.0524751	0.0535843	0.0160652
A0A024R4Q8	Ribosomal protein S5, isoform CRA_a	RPS5	0	41.6667	8	232	1	22.9	9.72	18	18	18	0.314246	0.313972	0.311257	0.313158	0.00165209	3	8	4	0.0857633	0.22818	0.117959	0.143968	0.0746858	2	2	3	0.0787092	0.0749625	0.121114	0.0915953	0.0256327	6	3	3	0.201275	0.093838	0.096	0.130371	0.061414	15	19	20	0.263158	0.361974	0.349834	0.324988	0.0538898
A8K517	Ribosomal protein S23, isoform CRA_a	RPS23	0	23.7762	3	66	1	15.8	10.49	1	1	2	0.0174581	0.0174429	0.0345841	0.0231617	0.00989211	5	4	7	0.142939	0.11409	0.206429	0.154486	0.0472399	6	4	8	0.236128	0.149925	0.322971	0.236341	0.0865233	6	7	5	0.201275	0.218955	0.16	0.19341	0.0302543
A0A024R1Q8	Ribosomal protein L23, isoform CRA_b	RPL23	0	52.8571	6	407	1	14.9	10.51	12	12	14	0.209497	0.209314	0.242089	0.2203	0.0188698	28	39	33	0.800457	1.11238	0.973164	0.962	0.15626	35	30	32	1.37741	1.12444	1.29189	1.26458	0.128678	25	26	29	0.838645	0.813262	0.928	0.859969	0.0602679	6	11	12	0.105263	0.209564	0.2099	0.174909	0.0603154
B1PS43	Myosin heavy chain 11 smooth muscle isoform	MYH11	0	10.5964	25	1109	1	234.1	5.8	90	97	102	1.57123	1.69196	1.76379	1.67566	0.0973099	22	27	24	0.628931	0.770108	0.707756	0.702265	0.0707488	21	14	15	0.826446	0.524738	0.605571	0.652252	0.156177	32	34	29	1.07347	1.0635	0.928	1.02165	0.0812598	73	73	72	1.2807	1.39074	1.2594	1.31028	0.0704892
A0A024R7T3	Heterogeneous nuclear ribonucleoprotein F, isoform CRA_a	HNRPF	0	18.3133	5	161	1	45.6	5.58	13	12	14	0.226955	0.209314	0.242089	0.22612	0.0164032	6	5	4	0.171527	0.142613	0.117959	0.144033	0.0268119	6	7	3	0.236128	0.262369	0.121114	0.206537	0.0751327	5	6	6	0.167729	0.187676	0.192	0.182468	0.0129465	11	10	14	0.192982	0.190512	0.244884	0.20946	0.0307031
Q53F64	Heterogeneous nuclear ribonucleoprotein AB isoform a variant (Fragment)		0	13.8554	4	113	1	36	7.42	5	6	4	0.0872905	0.104657	0.0691683	0.0870387	0.0177458	2	3	3	0.0571755	0.0855676	0.0884695	0.0770709	0.0172909	5	1	2	0.196773	0.0374813	0.0807428	0.104999	0.0823695	3	1	3	0.100637	0.0312793	0.096	0.0759722	0.0387746	6	6	5	0.105263	0.114307	0.0874585	0.102343	0.0136606
A0A024RBF6	HCG26523, isoform CRA_a	hCG_26523	0	12.4138	3	41	1	17.3	10.2	2	2	2	0.0349162	0.0348857	0.0345841	0.0347954	0.000183566	2	2	1	0.0571755	0.0570451	0.0294898	0.0479035	0.0159468	1	1	1	0.0393546	0.0374813	0.0403714	0.0390691	0.00146608	1	3	2	0.0335458	0.093838	0.064	0.0637946	0.0301466	2	3	4	0.0350877	0.0571537	0.0699668	0.0540694	0.0176429
A0A0S2Z428	HCG2039812, isoform CRA_b (Fragment)	KRT6A	0	46.2766	24	572	1	60	8	27	26	20	0.471369	0.453515	0.345841	0.423575	0.0679086	13	11	11	0.371641	0.313748	0.324388	0.336592	0.0308157	31	40	25	1.21999	1.49925	1.00929	1.24284	0.24578	13	8	8	0.436095	0.250235	0.256	0.31411	0.105682	23	23	22	0.403509	0.438179	0.384817	0.408835	0.0270765
Q59F66	DEAD box polypeptide 17 isoform p82 variant (Fragment)		0	17.7748	11	212	1	81	7.93	16	16	14	0.27933	0.279086	0.242089	0.266835	0.021431	6	6	10	0.171527	0.171135	0.294898	0.21252	0.0713419	5	10	7	0.196773	0.374813	0.2826	0.284728	0.0890389	8	8	11	0.268366	0.250235	0.352	0.2902	0.0542825	8	9	6	0.140351	0.171461	0.10495	0.138921	0.0332786
D3DUK1	Breast cancer anti-estrogen resistance 1, isoform CRA_a	BCAR1	0	16.7793	10	106	1	95.1	5.74	3	3	3	0.0523743	0.0523286	0.0518762	0.052193	0.000275348	6	6	5	0.171527	0.171135	0.147449	0.16337	0.0137895	6	10	8	0.236128	0.374813	0.322971	0.311304	0.0700749	12	10	7	0.402549	0.312793	0.224	0.313114	0.0892752	6	7	6	0.105263	0.133359	0.10495	0.114524	0.0163121
P62701	40S ribosomal protein S4, X isoform	RPS4X	0	35.3612	9	367	1	29.6	10.15	16	18	17	0.27933	0.313972	0.293965	0.295755	0.0173903	20	18	17	0.571755	0.513406	0.501327	0.528829	0.0376624	17	18	16	0.669028	0.674663	0.645943	0.663211	0.015218	18	15	23	0.603824	0.46919	0.736	0.603005	0.133407	14	15	17	0.245614	0.285769	0.297359	0.276247	0.0271546
B5BU08	U2 small nuclear RNA auxillary factor 1 isoform a	U2AF1	0	8.75	2	35	1	27.9	8.54	3	2	4	0.0523743	0.0348857	0.0691683	0.0521428	0.0171424																									2	2	3	0.0350877	0.0381025	0.0524751	0.0418884	0.00929139
A0A024R0M6	Translocase of inner mitochondrial membrane 50 homolog (Yeast), isoform CRA_b	TIMM50	0	5.26316	2	17	1	50.4	9.42									2	1	1	0.0571755	0.0285225	0.0294898	0.038396	0.0162708	1	1	2	0.0393546	0.0374813	0.0807428	0.0525262	0.0244542	1	2	1	0.0335458	0.0625586	0.032	0.0427015	0.0172142
G3V1L9	Tight junction protein 1 (Zona occludens 1), isoform CRA_a	TJP1	0	6.3914	10	43	1	197.3	6.67	3	1	5	0.0523743	0.0174429	0.0864603	0.0520925	0.0345096	5	3	4	0.142939	0.0855676	0.117959	0.115489	0.0287653									4	3	4	0.134183	0.093838	0.128	0.118674	0.0217294
A0A024RBE7	Thymopoietin, isoform CRA_c	TMPO	0	19.6035	6	40	1	50.6	9.38	4	9	4	0.0698324	0.156986	0.0691683	0.0986622	0.0505109																									2	3	2	0.0350877	0.0571537	0.0349834	0.0424083	0.0127701
A0A024R355	Three prime histone mRNA exonuclease 1, isoform CRA_b	THEX1	0.002	4.29799	1	5	1	40	6.7
Q59F99	Staufen isoform b variant (Fragment)		0	4.90694	2	4	1	64.7	9.42
A0A024R8U5	Splicing factor, arginine/serine-rich 2, isoform CRA_a	SFRS2	0	11.3122	2	2	1	25.5	11.85
D3DR65	SPFH domain family, member 1, isoform CRA_a	SPFH1	0.002	3.44828	1	1	1	39.1	7.87
A0A024QYY9	Spectrin domain with coiled-coils 1, isoform CRA_a	SPECC1	0	2.05993	2	5	1	118.5	6.7
A0A0S2Z4Z6	Serine/arginine repetitive matrix 1 isoform 2 (Fragment)	SRRM1	0	9.69499	5	73	1	103.9	11.84	3	3	4	0.0523743	0.0523286	0.0691683	0.0579571	0.0097092	1	1	1	0.0285878	0.0285225	0.0294898	0.0288667	0.000540621																	5	4	3	0.0877193	0.076205	0.0524751	0.0721331	0.0179715
P31153	S-adenosylmethionine synthase isoform type-2	MAT2A	0.007	3.79747	1	4	1	43.6	6.48
A0A0A0MR66	RNA binding motif protein 10, isoform CRA_d	RBM10	0	3.71859	3	3	1	110.3	6.28
A0A024R814	Ribosomal protein L7, isoform CRA_a	RPL7	0	16.9884	4	51	1	30.4	10.71	4	6	6	0.0698324	0.104657	0.103752	0.0927473	0.0198501	1	1	1	0.0285878	0.0285225	0.0294898	0.0288667	0.000540621									1	1	1	0.0335458	0.0312793	0.032	0.032275	0.00115799	1	3	3	0.0175439	0.0571537	0.0524751	0.0423909	0.0216449
A0A024R8P8	Ribosomal protein L38, isoform CRA_a	RPL38	0.002	18.5714	1	1	1	8.2	10.1
B5BUD2	Replication factor C 2 isoform 1 (Fragment)	RFC2	0	8.47458	2	6	1	39.2	6.44																																	1	1	1	0.0175439	0.0190512	0.0174917	0.0180289	0.000885735
A0A024RDQ8	Replication factor C (Activator 1) 3, 38kDa, isoform CRA_a	RFC3	0	7.86517	2	10	1	40.5	8.34	1	2	2	0.0174581	0.0348857	0.0345841	0.028976	0.00997593																									1	1	1	0.0175439	0.0190512	0.0174917	0.0180289	0.000885735
A0A024RDE5	Ras-GTPase activating protein SH3 domain-binding protein 2, isoform CRA_a	G3BP2	0	6.84647	2	7	1	54.1	5.55
A0A024R136	Rac GTPase activating protein 1, isoform CRA_a	RACGAP1	0.002	2.53165	1	3	1	71	8.88
A0A024R203	Proteasome (Prosome, macropain) activator subunit 3 (PA28 gamma Ki), isoform CRA_a	PSME3	0	11.3208	2	5	1	30.9	6.71
A8K401	Prohibitin, isoform CRA_a	PHB	0	15.4412	3	23	1	29.8	5.76
A0A0S2Z556	Polyglutamine binding protein 1 isoform 2 (Fragment)	PQBP1	0.004	4.27046	1	1	1	32.2	6.34
D3DSQ0	Pericentriolar material 1, isoform CRA_a	PCM1	0	1.58103	3	5	1	228.4	5.02	1	1	2	0.0174581	0.0174429	0.0345841	0.0231617	0.00989211
A0A024R6W2	Nudix (Nucleoside diphosphate linked moiety X)-type motif 21, isoform CRA_a	NUDT21	0	19.3833	4	12	1	26.2	8.82
A0A024RBB7	Nucleosome assembly protein 1-like 1, isoform CRA_a	NAP1L1	0.002	4.34783	1	10	1	45.3	4.46	1	2	2	0.0174581	0.0348857	0.0345841	0.028976	0.00997593
A0A024QZW7	Nucleoporin 153kDa, isoform CRA_a	NUP153	0.002	0.881356	1	1	1	153.9	8.73
A0A0S2Z491	Nucleophosmin isoform 2 (Fragment)	NPM1	0	26.5306	5	60	1	32.6	4.78	5	7	7	0.0872905	0.1221	0.121044	0.110145	0.0197996																									4	4	3	0.0701754	0.076205	0.0524751	0.0662852	0.012334
A0A024R8R4	Nuclear protein localization 4 homolog (S. cerevisiae), isoform CRA_a	NPLOC4	0.002	2.96053	1	1	1	68.1	6.38
A0A0S2Z4Z9	Non-POU domain containing octamer-binding isoform 1 (Fragment)	NONO	0	9.97877	5	28	1	54.2	8.95	2	1	2	0.0349162	0.0174429	0.0345841	0.0289811	0.00999375																	1	1	1	0.0335458	0.0312793	0.032	0.032275	0.00115799	1	2	1	0.0175439	0.0381025	0.0174917	0.0243793	0.0118846
Q01449	Myosin regulatory light chain 2, atrial isoform	MYL7	0.002	5.71429	1	11	1	19.4	4.88	1	1	1	0.0174581	0.0174429	0.0172921	0.0173977	9.17828e-05
A0A024RAM4	Microtubule-associated protein 1B, isoform CRA_b	MAP1B	0	1.01297	2	6	1	270.5	4.81	1	1	1	0.0174581	0.0174429	0.0172921	0.0173977	9.17828e-05
Q53G47	LUC7-like isoform b variant (Fragment)		0	16.1725	5	24	1	43.7	9.98	3	1	3	0.0523743	0.0174429	0.0518762	0.0405645	0.0200254																									2	2	3	0.0350877	0.0381025	0.0524751	0.0418884	0.00929139
A0A024R1S8	LIM and SH3 protein 1, isoform CRA_b	LASP1	0.002	10.3448	2	2	1	29.7	7.05
A0A024RAC0	Leucine zipper protein 1, isoform CRA_a	LUZP1	0	6.41264	5	12	1	120.2	8.63									1	1	1	0.0285878	0.0285225	0.0294898	0.0288667	0.000540621
A0A024R2K4	Leucine rich repeat (In FLII) interacting protein 2, isoform CRA_b	LRRFIP2	0	7.27763	4	51	1	84.1	6.98	5	7	6	0.0872905	0.1221	0.103752	0.104381	0.0174133																	3	2	2	0.100637	0.0625586	0.064	0.075732	0.0215807	4	4	5	0.0701754	0.076205	0.0874585	0.0779463	0.0087721
A0A0S2Z3Y1	Lectin galactoside-binding soluble 3 binding protein isoform 1 (Fragment)	LGALS3BP	0.002	2.22222	1	2	1	65.3	5.27
P42166	Lamina-associated polypeptide 2, isoform alpha	TMPO	0	13.6888	6	29	1	75.4	7.66	4	5	3	0.0698324	0.0872144	0.0518762	0.069641	0.0176699
A0A024QZK8	Heterogeneous nuclear ribonucleoprotein H3 (2H9), isoform CRA_a	HNRPH3	0	8.67052	2	24	1	36.9	6.87	4	2	6	0.0698324	0.0348857	0.103752	0.0694902	0.0344346
A0A024RDF6	Heterogeneous nuclear ribonucleoprotein D-like, isoform CRA_a	HNRPDL	0	6.19048	2	37	1	46.4	9.57	1	1	1	0.0174581	0.0174429	0.0172921	0.0173977	9.17828e-05
A0A024RDB4	Heterogeneous nuclear ribonucleoprotein D (AU-rich element RNA binding protein 1, 37kDa), isoform CRA_c	HNRPD	0	16.369	4	108	1	36.2	8.1	4	5	3	0.0698324	0.0872144	0.0518762	0.069641	0.0176699									2	2	1	0.0787092	0.0749625	0.0403714	0.064681	0.0211359									6	5	4	0.105263	0.0952562	0.0699668	0.0901621	0.0181913
A0A024RAZ7	Heterogeneous nuclear ribonucleoprotein A1, isoform CRA_b	HNRPA1	0	21.7742	7	99	1	38.7	9.13	12	13	10	0.209497	0.226757	0.172921	0.203058	0.0274899																									4	9	6	0.0701754	0.171461	0.10495	0.115529	0.0514649
A0A024R9P1	HCG2026745, isoform CRA_a	hCG_2026745	0	4.91803	1	2	1	34.1	11.81
X5DR09	General transcription factor IIi isoform A (Fragment)	GTF2I	0	2.80561	2	4	1	112.3	6.39
A0A024R7M6	GATA zinc finger domain containing 2A, isoform CRA_a	GATAD2A	0.003	1.73502	1	6	1	68.1	9.94	1	1	1	0.0174581	0.0174429	0.0172921	0.0173977	9.17828e-05
X5D907	Fragile X mental retardation 1 isoform C (Fragment)	FMR1	0.002	2.52525	1	1	1	66.9	7.23
A0A024R321	Filamin B, beta (Actin binding protein 278), isoform CRA_a	FLNB	0	4.76735	9	48	1	280.3	5.94	4	1	3	0.0698324	0.0174429	0.0518762	0.0463838	0.0266231																									7	3	6	0.122807	0.0571537	0.10495	0.0949703	0.0339453
A0A024R3W7	Eukaryotic translation elongation factor 1 beta 2, isoform CRA_a	EEF1B2	0.002	5.77778	1	5	1	24.7	4.67
A0A024R2T6	DEAH (Asp-Glu-Ala-His) box polypeptide 30, isoform CRA_b	DHX30	0	3.18258	3	4	1	133.9	8.78	1	1	2	0.0174581	0.0174429	0.0345841	0.0231617	0.00989211
A0A024RBH2	Cytoskeleton-associated protein 4, isoform CRA_c	CKAP4	0	17.1096	7	40	1	66	5.92	4	3	1	0.0698324	0.0523286	0.0172921	0.0464844	0.0267533																									2	3	2	0.0350877	0.0571537	0.0349834	0.0424083	0.0127701
A0A024R880	Cyclin-dependent kinase 9 (CDC2-related kinase), isoform CRA_a	CDK9	0	6.72043	2	2	1	42.8	8.79
A0A0S2Z471	Creatine kinase brain isoform 2 (Fragment)	CKB	0	19.5062	5	16	1	44.9	6.11
Q549N0	Cofilin 2 (Muscle), isoform CRA_a	CFL2	0	18.6747	2	21	1	18.7	7.88									2	2	1	0.0571755	0.0570451	0.0294898	0.0479035	0.0159468	2	1	1	0.0787092	0.0374813	0.0403714	0.0521873	0.023014									2	4	1	0.0350877	0.076205	0.0174917	0.0429281	0.0301317
A0A0S2Z5H3	Clathrin interactor 1 isoform 2 (Fragment)	CLINT1	0	10.8865	5	27	1	70.3	6.58	5	4	4	0.0872905	0.0697715	0.0691683	0.0754101	0.0102932																									2	3	5	0.0350877	0.0571537	0.0874585	0.0599	0.0262932
J3KPP4	Cisplatin resistance-associated overexpressed protein, isoform CRA_b	LUC7L3	0	6.54397	2	22	1	58.2	9.92	2	2	1	0.0349162	0.0348857	0.0172921	0.0290313	0.0101665																									2	1	3	0.0350877	0.0190512	0.0524751	0.035538	0.0167165
H0Y4Z8	Chromosome 9 open reading frame 86, isoform CRA_b	RABL6	0	6.57534	3	19	1	79.6	5.22	1	2	1	0.0174581	0.0348857	0.0172921	0.023212	0.0101101
A8K4W2	cDNA FLJ78635, highly similar to Homo sapiens ATP synthase, H+ transporting, mitochondrial F0 complex, subunit b, isoform 1 (ATP5F1), transcript variant 1, mRNA		0.002	4.6875	1	11	1	28.9	9.36
A0A024QZC1	CD2 antigen (Cytoplasmic tail) binding protein 2, isoform CRA_a	CD2BP2	0.005	4.10557	1	3	1	37.6	4.61
A0A024RAI1	ARP3 actin-related protein 3 homolog (Yeast), isoform CRA_a	ACTR3	0	5.02392	2	8	1	47.3	5.88
Q59EI9	ADP,ATP carrier protein, liver isoform T2 variant (Fragment)		0	13.9319	4	33	1	35.4	9.85	3	2	2	0.0523743	0.0348857	0.0345841	0.0406147	0.0101852
Q59EC0	Adenosine deaminase, RNA-specific isoform ADAR-a variant (Fragment)		0.003	1.20579	1	1	1	137.7	8.48
[truncated: 43 more columns]

## Sheet: Unique with XL
Table S7c. Detailed information about list of identified unique proteoforms in HEK293 cells upon treatment with Statin and/or LPS, alone or in combination with cross-linker (XL)
Accession	Description	Gene Name	Exp. q-value	Coverage	Peptides	PSMs	Protein Groups	MW [kDa]	calc. pI	Control PSMs			Control Nor. PSMs			Control	SD Value	LPS PSMs			LPS Nor. PSMs			LPS	SD Value	Statin-PSMs			Statin Nor. PSMs			Statin	SD Value	LPS-Statin-PSMs			LPS-StatinNor. PSMs			Statin-LPS	SD Value	Control XL PSMs			Control XL Nor. PSMs			Control-XL	SD Value
										R1	R2	R3	R1	R2	R3			R1	R2	R3	R1	R2	R3			R1	R2	R3	R1	R2	R3			R1	R2	R3	R1	R2	R3			R1	R2	R3	R1	R2	R3
A0A024R1N4	X-ray repair complementing defective repair in Chinese hamster cells 6 (Ku autoantigen, 70kDa), isoform CRA_a	XRCC6	0	30.2135	16	227	1	69.8	6.64	22	13	22	0.384078	0.226757	0.380425	0.33042	0.0897933	3	2	2	0.0857633	0.0570451	0.0589797	0.0672627	0.0160512	2	5	2	0.0787092	0.187406	0.0807428	0.115619	0.0621776	2	2	3	0.0670916	0.0625586	0.096	0.0752167	0.018141	10	10	10	0.175439	0.190512	0.174917	0.180289	0.00885735
D3DQ70	SERPINE1 mRNA binding protein 1, isoform CRA_d	SERBP1	0	14.4086	5	179	1	50.9	9.33	9	11	10	0.157123	0.191872	0.172921	0.173972	0.0173982	3	5	2	0.0857633	0.142613	0.0589797	0.0957852	0.0427077	3	5	3	0.118064	0.187406	0.121114	0.142195	0.039184	6	7	6	0.201275	0.218955	0.192	0.204077	0.0136943	11	13	9	0.192982	0.247666	0.157425	0.199358	0.0454571
A0A0S2Z4Z6	Serine/arginine repetitive matrix 1 isoform 2 (Fragment)	SRRM1	0	9.69499	5	73	1	103.9	11.84	3	3	4	0.0523743	0.0523286	0.0691683	0.0579571	0.0097092	1	1	1	0.0285878	0.0285225	0.0294898	0.0288667	0.000540621																	5	4	3	0.0877193	0.076205	0.0524751	0.0721331	0.0179715
A0A024R4Q8	Ribosomal protein S5, isoform CRA_a	RPS5	0	41.6667	8	232	1	22.9	9.72	18	18	18	0.314246	0.313972	0.311257	0.313158	0.00165209	3	8	4	0.0857633	0.22818	0.117959	0.143968	0.0746858	2	2	3	0.0787092	0.0749625	0.121114	0.0915953	0.0256327	6	3	3	0.201275	0.093838	0.096	0.130371	0.061414	15	19	20	0.263158	0.361974	0.349834	0.324988	0.0538898
A0A024R1Q8	Ribosomal protein L23, isoform CRA_b	RPL23	0	52.8571	6	407	1	14.9	10.51	12	12	14	0.209497	0.209314	0.242089	0.2203	0.0188698	28	39	33	0.800457	1.11238	0.973164	0.962	0.15626	35	30	32	1.37741	1.12444	1.29189	1.26458	0.128678	25	26	29	0.838645	0.813262	0.928	0.859969	0.0602679	6	11	12	0.105263	0.209564	0.2099	0.174909	0.0603154
A0A0S2Z491	Nucleophosmin isoform 2 (Fragment)	NPM1	0	26.5306	5	60	1	32.6	4.78	5	7	7	0.0872905	0.1221	0.121044	0.110145	0.0197996																									4	4	3	0.0701754	0.076205	0.0524751	0.0662852	0.012334
B1PS43	Myosin heavy chain 11 smooth muscle isoform	MYH11	0	10.5964	25	1109	1	234.1	5.8	90	97	102	1.57123	1.69196	1.76379	1.67566	0.0973099	22	27	24	0.628931	0.770108	0.707756	0.702265	0.0707488	21	14	15	0.826446	0.524738	0.605571	0.652252	0.156177	32	34	29	1.07347	1.0635	0.928	1.02165	0.0812598	73	73	72	1.2807	1.39074	1.2594	1.31028	0.0704892
A0A024RDB4	Heterogeneous nuclear ribonucleoprotein D (AU-rich element RNA binding protein 1, 37kDa), isoform CRA_c	HNRPD	0	16.369	4	108	1	36.2	8.1	4	5	3	0.0698324	0.0872144	0.0518762	0.069641	0.0176699									2	2	1	0.0787092	0.0749625	0.0403714	0.064681	0.0211359									6	5	4	0.105263	0.0952562	0.0699668	0.0901621	0.0181913
Q53F64	Heterogeneous nuclear ribonucleoprotein AB isoform a variant (Fragment)		0	13.8554	4	113	1	36	7.42	5	6	4	0.0872905	0.104657	0.0691683	0.0870387	0.0177458	2	3	3	0.0571755	0.0855676	0.0884695	0.0770709	0.0172909	5	1	2	0.196773	0.0374813	0.0807428	0.104999	0.0823695	3	1	3	0.100637	0.0312793	0.096	0.0759722	0.0387746	6	6	5	0.105263	0.114307	0.0874585	0.102343	0.0136606
A0A0S2Z428	HCG2039812, isoform CRA_b (Fragment)	KRT6A	0	46.2766	24	572	1	60	8	27	26	20	0.471369	0.453515	0.345841	0.423575	0.0679086	13	11	11	0.371641	0.313748	0.324388	0.336592	0.0308157	31	40	25	1.21999	1.49925	1.00929	1.24284	0.24578	13	8	8	0.436095	0.250235	0.256	0.31411	0.105682	23	23	22	0.403509	0.438179	0.384817	0.408835	0.0270765
Q59F66	DEAD box polypeptide 17 isoform p82 variant (Fragment)		0	17.7748	11	212	1	81	7.93	16	16	14	0.27933	0.279086	0.242089	0.266835	0.021431	6	6	10	0.171527	0.171135	0.294898	0.21252	0.0713419	5	10	7	0.196773	0.374813	0.2826	0.284728	0.0890389	8	8	11	0.268366	0.250235	0.352	0.2902	0.0542825	8	9	6	0.140351	0.171461	0.10495	0.138921	0.0332786
P62701	40S ribosomal protein S4, X isoform	RPS4X	0	35.3612	9	367	1	29.6	10.15	16	18	17	0.27933	0.313972	0.293965	0.295755	0.0173903	20	18	17	0.571755	0.513406	0.501327	0.528829	0.0376624	17	18	16	0.669028	0.674663	0.645943	0.663211	0.015218	18	15	23	0.603824	0.46919	0.736	0.603005	0.133407	14	15	17	0.245614	0.285769	0.297359	0.276247	0.0271546
B5BU08	U2 small nuclear RNA auxillary factor 1 isoform a	U2AF1	0	8.75	2	35	1	27.9	8.54	3	2	4	0.0523743	0.0348857	0.0691683	0.0521428	0.0171424																									2	2	3	0.0350877	0.0381025	0.0524751	0.0418884	0.00929139
A0A0S2Z4G4	Tropomyosin 3 isoform 1 (Fragment)	TPM3	0	39.1129	11	190	1	29	4.78	13	11	13	0.226955	0.191872	0.224797	0.214541	0.0196621	11	13	11	0.314465	0.370793	0.324388	0.336549	0.0300684	9	7	8	0.354191	0.262369	0.322971	0.313177	0.0466882	13	12	8	0.436095	0.375352	0.256	0.355816	0.0916233	8	9	9	0.140351	0.171461	0.157425	0.156412	0.0155799
Q6ZN40	Tropomyosin 1 (Alpha), isoform CRA_f	TPM1	0	15.6442	5	60	1	37.4	4.72	5	4	6	0.0872905	0.0697715	0.103752	0.0869381	0.0169932	3	5	2	0.0857633	0.142613	0.0589797	0.0957852	0.0427077	2	1	3	0.0787092	0.0374813	0.121114	0.0791016	0.0418179	3	2	2	0.100637	0.0625586	0.064	0.075732	0.0215807	3	3	3	0.0526316	0.0571537	0.0524751	0.0540868	0.0026572
A0A024R0M6	Translocase of inner mitochondrial membrane 50 homolog (Yeast), isoform CRA_b	TIMM50	0	5.26316	2	17	1	50.4	9.42									2	1	1	0.0571755	0.0285225	0.0294898	0.038396	0.0162708	1	1	2	0.0393546	0.0374813	0.0807428	0.0525262	0.0244542	1	2	1	0.0335458	0.0625586	0.032	0.0427015	0.0172142
G3V1L9	Tight junction protein 1 (Zona occludens 1), isoform CRA_a	TJP1	0	6.3914	10	43	1	197.3	6.67	3	1	5	0.0523743	0.0174429	0.0864603	0.0520925	0.0345096	5	3	4	0.142939	0.0855676	0.117959	0.115489	0.0287653									4	3	4	0.134183	0.093838	0.128	0.118674	0.0217294
A0A024RBE7	Thymopoietin, isoform CRA_c	TMPO	0	19.6035	6	40	1	50.6	9.38	4	9	4	0.0698324	0.156986	0.0691683	0.0986622	0.0505109																									2	3	2	0.0350877	0.0571537	0.0349834	0.0424083	0.0127701
A0A024R355	Three prime histone mRNA exonuclease 1, isoform CRA_b	THEX1	0.002	4.29799	1	5	1	40	6.7
Q59F99	Staufen isoform b variant (Fragment)		0	4.90694	2	4	1	64.7	9.42
A0A024R8U5	Splicing factor, arginine/serine-rich 2, isoform CRA_a	SFRS2	0	11.3122	2	2	1	25.5	11.85
D3DR65	SPFH domain family, member 1, isoform CRA_a	SPFH1	0.002	3.44828	1	1	1	39.1	7.87
A0A024QYY9	Spectrin domain with coiled-coils 1, isoform CRA_a	SPECC1	0	2.05993	2	5	1	118.5	6.7
P31153	S-adenosylmethionine synthase isoform type-2	MAT2A	0.007	3.79747	1	4	1	43.6	6.48
A0A0A0MR66	RNA binding motif protein 10, isoform CRA_d	RBM10	0	3.71859	3	3	1	110.3	6.28
A0A024R608	Ribosomal protein, large, P1, isoform CRA_a	RPLP1	0	28.9474	2	45	1	11.5	4.32	3	5	5	0.0523743	0.0872144	0.0864603	0.0753497	0.0199008	2	1	4	0.0571755	0.0285225	0.117959	0.0678858	0.0456702	1	2	1	0.0393546	0.0749625	0.0403714	0.0515628	0.0202711	4	1	1	0.134183	0.0312793	0.032	0.0658208	0.0592046	4	2	3	0.0701754	0.0381025	0.0524751	0.0535843	0.0160652
A8K517	Ribosomal protein S23, isoform CRA_a	RPS23	0	23.7762	3	66	1	15.8	10.49	1	1	2	0.0174581	0.0174429	0.0345841	0.0231617	0.00989211	5	4	7	0.142939	0.11409	0.206429	0.154486	0.0472399	6	4	8	0.236128	0.149925	0.322971	0.236341	0.0865233	6	7	5	0.201275	0.218955	0.16	0.19341	0.0302543
A0A024R814	Ribosomal protein L7, isoform CRA_a	RPL7	0	16.9884	4	51	1	30.4	10.71	4	6	6	0.0698324	0.104657	0.103752	0.0927473	0.0198501	1	1	1	0.0285878	0.0285225	0.0294898	0.0288667	0.000540621									1	1	1	0.0335458	0.0312793	0.032	0.032275	0.00115799	1	3	3	0.0175439	0.0571537	0.0524751	0.0423909	0.0216449
A0A024R8P8	Ribosomal protein L38, isoform CRA_a	RPL38	0.002	18.5714	1	1	1	8.2	10.1
B5BUD2	Replication factor C 2 isoform 1 (Fragment)	RFC2	0	8.47458	2	6	1	39.2	6.44																																	1	1	1	0.0175439	0.0190512	0.0174917	0.0180289	0.000885735
A0A024RDQ8	Replication factor C (Activator 1) 3, 38kDa, isoform CRA_a	RFC3	0	7.86517	2	10	1	40.5	8.34	1	2	2	0.0174581	0.0348857	0.0345841	0.028976	0.00997593																									1	1	1	0.0175439	0.0190512	0.0174917	0.0180289	0.000885735
A0A024RDE5	Ras-GTPase activating protein SH3 domain-binding protein 2, isoform CRA_a	G3BP2	0	6.84647	2	7	1	54.1	5.55
A0A024R136	Rac GTPase activating protein 1, isoform CRA_a	RACGAP1	0.002	2.53165	1	3	1	71	8.88
A0A024R203	Proteasome (Prosome, macropain) activator subunit 3 (PA28 gamma Ki), isoform CRA_a	PSME3	0	11.3208	2	5	1	30.9	6.71
A8K401	Prohibitin, isoform CRA_a	PHB	0	15.4412	3	23	1	29.8	5.76
A0A0S2Z556	Polyglutamine binding protein 1 isoform 2 (Fragment)	PQBP1	0.004	4.27046	1	1	1	32.2	6.34
D3DSQ0	Pericentriolar material 1, isoform CRA_a	PCM1	0	1.58103	3	5	1	228.4	5.02	1	1	2	0.0174581	0.0174429	0.0345841	0.0231617	0.00989211
A0A024R6W2	Nudix (Nucleoside diphosphate linked moiety X)-type motif 21, isoform CRA_a	NUDT21	0	19.3833	4	12	1	26.2	8.82
A0A024RBB7	Nucleosome assembly protein 1-like 1, isoform CRA_a	NAP1L1	0.002	4.34783	1	10	1	45.3	4.46	1	2	2	0.0174581	0.0348857	0.0345841	0.028976	0.00997593
A0A024QZW7	Nucleoporin 153kDa, isoform CRA_a	NUP153	0.002	0.881356	1	1	1	153.9	8.73
A0A024R8R4	Nuclear protein localization 4 homolog (S. cerevisiae), isoform CRA_a	NPLOC4	0.002	2.96053	1	1	1	68.1	6.38
A0A0S2Z4Z9	Non-POU domain containing octamer-binding isoform 1 (Fragment)	NONO	0	9.97877	5	28	1	54.2	8.95	2	1	2	0.0349162	0.0174429	0.0345841	0.0289811	0.00999375																	1	1	1	0.0335458	0.0312793	0.032	0.032275	0.00115799	1	2	1	0.0175439	0.0381025	0.0174917	0.0243793	0.0118846
Q01449	Myosin regulatory light chain 2, atrial isoform	MYL7	0.002	5.71429	1	11	1	19.4	4.88	1	1	1	0.0174581	0.0174429	0.0172921	0.0173977	9.17828e-05
A0A024RAM4	Microtubule-associated protein 1B, isoform CRA_b	MAP1B	0	1.01297	2	6	1	270.5	4.81	1	1	1	0.0174581	0.0174429	0.0172921	0.0173977	9.17828e-05
Q53G47	LUC7-like isoform b variant (Fragment)		0	16.1725	5	24	1	43.7	9.98	3	1	3	0.0523743	0.0174429	0.0518762	0.0405645	0.0200254																									2	2	3	0.0350877	0.0381025	0.0524751	0.0418884	0.00929139
A0A024R1S8	LIM and SH3 protein 1, isoform CRA_b	LASP1	0.002	10.3448	2	2	1	29.7	7.05
A0A024RAC0	Leucine zipper protein 1, isoform CRA_a	LUZP1	0	6.41264	5	12	1	120.2	8.63									1	1	1	0.0285878	0.0285225	0.0294898	0.0288667	0.000540621
A0A024R2K4	Leucine rich repeat (In FLII) interacting protein 2, isoform CRA_b	LRRFIP2	0	7.27763	4	51	1	84.1	6.98	5	7	6	0.0872905	0.1221	0.103752	0.104381	0.0174133																	3	2	2	0.100637	0.0625586	0.064	0.075732	0.0215807	4	4	5	0.0701754	0.076205	0.0874585	0.0779463	0.0087721
A0A0S2Z3Y1	Lectin galactoside-binding soluble 3 binding protein isoform 1 (Fragment)	LGALS3BP	0.002	2.22222	1	2	1	65.3	5.27
P42166	Lamina-associated polypeptide 2, isoform alpha	TMPO	0	13.6888	6	29	1	75.4	7.66	4	5	3	0.0698324	0.0872144	0.0518762	0.069641	0.0176699
A0A024QZK8	Heterogeneous nuclear ribonucleoprotein H3 (2H9), isoform CRA_a	HNRPH3	0	8.67052	2	24	1	36.9	6.87	4	2	6	0.0698324	0.0348857	0.103752	0.0694902	0.0344346
A0A024R7T3	Heterogeneous nuclear ribonucleoprotein F, isoform CRA_a	HNRPF	0	18.3133	5	161	1	45.6	5.58	13	12	14	0.226955	0.209314	0.242089	0.22612	0.0164032	6	5	4	0.171527	0.142613	0.117959	0.144033	0.0268119	6	7	3	0.236128	0.262369	0.121114	0.206537	0.0751327	5	6	6	0.167729	0.187676	0.192	0.182468	0.0129465	11	10	14	0.192982	0.190512	0.244884	0.20946	0.0307031
A0A024RDF6	Heterogeneous nuclear ribonucleoprotein D-like, isoform CRA_a	HNRPDL	0	6.19048	2	37	1	46.4	9.57	1	1	1	0.0174581	0.0174429	0.0172921	0.0173977	9.17828e-05
A0A024RAZ7	Heterogeneous nuclear ribonucleoprotein A1, isoform CRA_b	HNRPA1	0	21.7742	7	99	1	38.7	9.13	12	13	10	0.209497	0.226757	0.172921	0.203058	0.0274899																									4	9	6	0.0701754	0.171461	0.10495	0.115529	0.0514649
A0A024RBF6	HCG26523, isoform CRA_a	hCG_26523	0	12.4138	3	41	1	17.3	10.2	2	2	2	0.0349162	0.0348857	0.0345841	0.0347954	0.000183566	2	2	1	0.0571755	0.0570451	0.0294898	0.0479035	0.0159468	1	1	1	0.0393546	0.0374813	0.0403714	0.0390691	0.00146608	1	3	2	0.0335458	0.093838	0.064	0.0637946	0.0301466	2	3	4	0.0350877	0.0571537	0.0699668	0.0540694	0.0176429
A0A024R9P1	HCG2026745, isoform CRA_a	hCG_2026745	0	4.91803	1	2	1	34.1	11.81
X5DR09	General transcription factor IIi isoform A (Fragment)	GTF2I	0	2.80561	2	4	1	112.3	6.39
A0A024R7M6	GATA zinc finger domain containing 2A, isoform CRA_a	GATAD2A	0.003	1.73502	1	6	1	68.1	9.94	1	1	1	0.0174581	0.0174429	0.0172921	0.0173977	9.17828e-05
X5D907	Fragile X mental retardation 1 isoform C (Fragment)	FMR1	0.002	2.52525	1	1	1	66.9	7.23
A0A024R321	Filamin B, beta (Actin binding protein 278), isoform CRA_a	FLNB	0	4.76735	9	48	1	280.3	5.94	4	1	3	0.0698324	0.0174429	0.0518762	0.0463838	0.0266231																									7	3	6	0.122807	0.0571537	0.10495	0.0949703	0.0339453
A0A024R3W7	Eukaryotic translation elongation factor 1 beta 2, isoform CRA_a	EEF1B2	0.002	5.77778	1	5	1	24.7	4.67
A0A024R2T6	DEAH (Asp-Glu-Ala-His) box polypeptide 30, isoform CRA_b	DHX30	0	3.18258	3	4	1	133.9	8.78	1	1	2	0.0174581	0.0174429	0.0345841	0.0231617	0.00989211
A0A024RBH2	Cytoskeleton-associated protein 4, isoform CRA_c	CKAP4	0	17.1096	7	40	1	66	5.92	4	3	1	0.0698324	0.0523286	0.0172921	0.0464844	0.0267533																									2	3	2	0.0350877	0.0571537	0.0349834	0.0424083	0.0127701
A0A024R880	Cyclin-dependent kinase 9 (CDC2-related kinase), isoform CRA_a	CDK9	0	6.72043	2	2	1	42.8	8.79
A0A0S2Z471	Creatine kinase brain isoform 2 (Fragment)	CKB	0	19.5062	5	16	1	44.9	6.11
Q549N0	Cofilin 2 (Muscle), isoform CRA_a	CFL2	0	18.6747	2	21	1	18.7	7.88									2	2	1	0.0571755	0.0570451	0.0294898	0.0479035	0.0159468	2	1	1	0.0787092	0.0374813	0.0403714	0.0521873	0.023014									2	4	1	0.0350877	0.076205	0.0174917	0.0429281	0.0301317
A0A0S2Z5H3	Clathrin interactor 1 isoform 2 (Fragment)	CLINT1	0	10.8865	5	27	1	70.3	6.58	5	4	4	0.0872905	0.0697715	0.0691683	0.0754101	0.0102932																									2	3	5	0.0350877	0.0571537	0.0874585	0.0599	0.0262932
J3KPP4	Cisplatin resistance-associated overexpressed protein, isoform CRA_b	LUC7L3	0	6.54397	2	22	1	58.2	9.92	2	2	1	0.0349162	0.0348857	0.0172921	0.0290313	0.0101665																									2	1	3	0.0350877	0.0190512	0.0524751	0.035538	0.0167165
H0Y4Z8	Chromosome 9 open reading frame 86, isoform CRA_b	RABL6	0	6.57534	3	19	1	79.6	5.22	1	2	1	0.0174581	0.0348857	0.0172921	0.023212	0.0101101
A8K4W2	cDNA FLJ78635, highly similar to Homo sapiens ATP synthase, H+ transporting, mitochondrial F0 complex, subunit b, isoform 1 (ATP5F1), transcript variant 1, mRNA		0.002	4.6875	1	11	1	28.9	9.36
A0A024QZC1	CD2 antigen (Cytoplasmic tail) binding protein 2, isoform CRA_a	CD2BP2	0.005	4.10557	1	3	1	37.6	4.61
D3DUK1	Breast cancer anti-estrogen resistance 1, isoform CRA_a	BCAR1	0	16.7793	10	106	1	95.1	5.74	3	3	3	0.0523743	0.0523286	0.0518762	0.052193	0.000275348	6	6	5	0.171527	0.171135	0.147449	0.16337	0.0137895	6	10	8	0.236128	0.374813	0.322971	0.311304	0.0700749	12	10	7	0.402549	0.312793	0.224	0.313114	0.0892752	6	7	6	0.105263	0.133359	0.10495	0.114524	0.0163121
A0A024RAI1	ARP3 actin-related protein 3 homolog (Yeast), isoform CRA_a	ACTR3	0	5.02392	2	8	1	47.3	5.88
Q59EI9	ADP,ATP carrier protein, liver isoform T2 variant (Fragment)		0	13.9319	4	33	1	35.4	9.85	3	2	2	0.0523743	0.0348857	0.0345841	0.0406147	0.0101852
Q59EC0	Adenosine deaminase, RNA-specific isoform ADAR-a variant (Fragment)		0.003	1.20579	1	1	1	137.7	8.48
[truncated: 43 more columns]
